# Supplementary material for: Selecting variant masks to improve power and replicability of gene-level burden tests
Source: Research Square preprint supplement (doi:10.21203/rs.3.rs-6322956/v1), 2025-04-15
Supplement: Supplementary file 2 [file ec065f8ae369439e2b6c23db.xlsx]

## Sheet: Table of contents
Table	Description
Table 1	Mask definition and the number of significant associations detected by each mask in the recommended masking strategy
ST1	List of all publications in the literature review
ST2a	664 masks in the 234 shortlisted publications
ST2b	Bioinformatic annotation and allele frequency/count filters used in the 601 masks with well-documented definitions
ST2c	298 unique, harmonized masks and their definitions
ST2d	Numerical and categorical components in mask definitions
ST3	Definitions of maxMAF thresholds and bioinformatic annotation types
ST4	Descriptions of 55 continuous phenotypes analyzed
ST5a	Genomic inflation factors for 298 masks
ST5b	Genomic inflation factors for 55 phenotypes (after removing 6 highly inflated masks and 21 masks consisting of no variants)
ST6	Definitions of 271 masks previously employed and 153 new masks
ST7a	Number of total, low-frequency and rare significant associations for 54 phenotypes detected by each of the 271 masks previously employed
ST7b	Number of total, low-frequency and rare significant associations remaining after conditional analysis on common variants for 54 phenotypes detected by each of the 271 masks previously employed
ST8	Number of total, low-frequency and rare significant associations for 54 phenotypes detected by masking strategies in 163 publications after Bonferroni correction for the number of masks
ST9a	Cumulative variance explained ratio by each PC when applying PCA to binary variant inclusion for each mask
ST9b	10 clusters and 37 subclusters of masks
ST9c	List of masks in the 10-mask strategies from variant membership clustering
ST9d	List of masks in the 37-mask strategies from variant MAF clustering
ST10	Number of total, low-frequency and rare significant associations for 54 phenotypes detected by select masking strategies after Bonferroni correction for the number of masks
ST11	Results for the cross-validation analysis of the greedy covering method
ST12a	Masks in the optimal masking strategies for total, low-frequency and rare significant associations suggested by the greedy covering method when applied to 271 masks
ST12b	Masks in the optimal masking strategies for total, low-frequency and rare significant associations suggested by the greedy covering method when applied to 424 masks
ST13a	166 significant low-frequency and 64 significant rare associations detected by the recommended 8-mask strategies that were not detected by any of the 19 masks in the three high-profile studies of the UK Biobank in the same ~190K dataset
ST13b	GWAS signal for 202 significant associations detected by the recommended 8-mask strategies that were not detected by any of the 19 masks in the three high-profile studies of the UK Biobank in the same ~190K dataset
ST14a	Significantly enriched gene sets by the low-frequency 8-mask strategy after FDR correction in the ~440K analysis
ST14b	Significantly enriched gene sets by the rare 8-mask strategy after FDR correction in the ~440K analysis
ST15a	127 newly significant rare associations detected by the rare 8-mask strategy in the ~440K analysis that were not detected by any of the 19 masks in the three high-profile studies of the UK Biobank in similar 455K-500K samples
ST15b	Top 5 significant single variants contributing to the burden of each of the 127 newly significant rare associations
ST16	Number of samples assigned to each ancestry in the ~190K and ~440K analyses
ST17a	Descriptions of sample QC metrics
ST17b	Number of samples removed after sample QC in the ~190K and ~440K analyses
ST18a	Bioinformatic algorithms used to calculate missense variants' composite original, PC, and IC scores, and their rank score correlation with variant MAF
ST18b	Fraction of missense variants predicted to be damaging by each of the 21 bioinformatic algorithms with categorical prediction values
ST18c	Pearson correlation between MAF and each principal component of missense variants derived from 44 bioinformatic algorithms in the ~190K analysis
ST18d	Cumulative variance explained ratio by each principal component of missense variants derived from 44 bioinformatic algorithms in the ~190K analysis
ST18e	Pearson correlation between MAF and each independent component of missense variants derived from 39 bioinformatic algorithms in the ~190K analysis
ST19	Number of mask in trait-specific optimal masking strategies for each of the total, low-frequency, rare association analyses

## Sheet: Table 1
Association type	Mask	Mask definition	Number of significant associations	Number of significant associations added to the masking strategy	Number of significant associations cumulated in the masking strategy
Total associations	23633568_m1	stop_gained | frameshift | (missense & (SIFT_pred_D | Polyphen2_HVAR_pred_D_or_P | Polyphen2_HDIV_pred_D_or_P))	2164	2164	2164
Total associations	32141622_m7	stop_gained | essential_splice | frameshift | splice_region_variant	1320	1021	3185
Total associations	new_damaging_ic25	(LoF_HC | (missense & combo_ic25))	2133	859	4044
Total associations	30828346_m1	(missense | synonymous | stop_gained | stop_lost) & maf10	1370	591	4635
Total associations	new_damaging_og25	(LoF_HC | (missense & combo_og25))	1273	186	4821
Total associations	32141622_m4	indels	201	131	4952
Low-frequency associations	new_damaging_og25.0_01	(LoF_HC | (missense & combo_og25)) & maf1	349	349	349
Low-frequency associations	32853339_m1	(IMPACT_HIGH | ClinVar_pred_P_or_LP) & maf1	245	99	448
Low-frequency associations	29177435_m1	(incomplete_terminal_codon | start_retained | stop_retained | synonymous | IMPACT_MODERATE | IMPACT_HIGH) & maf1	258	84	532
Low-frequency associations	29378355_m1.0_01	(stop_gained | missense | essential_splice) & maf1 & maf_gt_0_5	148	58	590
Low-frequency associations	36327219_m3	(IMPACT_HIGH | (indels & IMPACT_MODERATE) | (missense & Polyphen2_HDIV_pred_D & Polyphen2_HVAR_pred_D & LRT_pred_D & MutationTaster_pred_D_or_A & SIFT_pred_D)) & maf1	324	49	639
Low-frequency associations	new_damaging_og50.0_01	(LoF_HC | (missense & combo_og50)) & maf1	309	31	670
Low-frequency associations	24507775_m6.0_01	(stop_gained | stop_lost | essential_splice | Polyphen2_HDIV_pred_D | Polyphen2_HVAR_pred_D) & maf1	304	29	699
Low-frequency associations	32141622_m7.0_01	(stop_gained | essential_splice | frameshift | splice_region_variant) & maf1	140	19	718
Rare associations	31383942_m4	(stop_gained | stop_lost | frameshift | essential_splice | (missense & REVEL_score_0_55)) & maf0_1	232	232	232
Rare associations	37348876_m8	(CADD_phred_20 | LoF_HC) & maf0_1	225	64	296
Rare associations	31383942_m10	(stop_gained | stop_lost | frameshift | essential_splice | ClinVar_pred_P_or_LP) & maf0_1	207	53	349
Rare associations	31118516_m5.0_001	(LoF_HC | (Polyphen2_HDIV_pred_D & Polyphen2_HVAR_pred_D & SIFT_pred_D & LRT_pred_D & MutationTaster_pred_D_or_A)) & maf0_1	210	24	373
Rare associations	36411364_m4.0_001	(LoF_HC | (missense & REVEL_score_0_75)) & maf0_1	220	15	388
Rare associations	34183866_m1	(stop_gained | essential_splice | frameshift | indels | (missense & Polyphen2_HDIV_pred_D)) & maf0_01	162	13	401
Rare associations	30269813_m4	(stop_gained | essential_splice | frameshift | indels | (missense & (Polyphen2_HDIV_pred_D | Polyphen2_HVAR_pred_D))) & maf0_1	223	11	412
Rare associations	34216101_m3.0_001	(Polyphen2_HDIV_pred_P | Polyphen2_HVAR_pred_P) & maf0_1	47	10	422

## Sheet: Table S1
PMID	Title	First Author	Journal/Book	Year	Number of citations (as of February 2024)	Citation rate (as of February 2024)	Decision*	Note
22641211	Exome sequencing and the genetic basis of complex traits	Kiezun A	Nat Genet	2012	220	18.3	0	Method or review paper
22558107	High-throughput sequencing of mGluR signaling pathway genes reveals enrichment of rare variants in autism	Kelleher RJ 3rd	PLoS One	2012	71	5.9	0	Copy number variants
22205304	Identification of rare, disease-associated variants in the promoter region of the RNF114 psoriasis susceptibility gene	Onoufriadis A	J Invest Dermatol	2012	1	0.1	-1
22714655	The role of large pedigrees in an era of high-throughput sequencing	Wijsman EM	Hum Genet	2012	62	5.2	0	Method or review paper
22912587	Rare copy number variations in adults with tetralogy of Fallot implicate novel risk gene pathways	Silversides CK	PLoS Genet	2012	87	7.2	0	Copy number variants
23159250	Copy-number disorders are a common cause of congenital kidney malformations	Sanna-Cherchi S	Am J Hum Genet	2012	117	9.8	0	Copy number variants
22939634	Contribution of global rare copy-number variants to the risk of sporadic congenital heart disease	Soemedi R	Am J Hum Genet	2012	140	11.7	0	Copy number variants
22863193	Optimal unified approach for rare-variant association testing with application to small-sample case-control whole-exome sequencing studies	Lee S	Am J Hum Genet	2012	569	47.4	0	Method or review paper
22363423	Reconsidering association testing methods using single-variant test statistics as alternatives to pooling tests for sequence data with rare variants	Kinnamon DD	PLoS One	2012	23	1.9	-1
23119120	Oncocytic lipoadenoma of the parotid gland: a report of a new case and review of the literature	Mitsimponas KT	Int J Clin Exp Pathol	2012	6	0.5	-1
37696869	Contribution of common and rare variants to Asian neovascular age-related macular degeneration subtypes	Fan Q	Nat Commun	2023	1	1	1
21840620	Complement receptor 1 (CR1) and Alzheimer's disease	Crehan H	Immunobiology	2012	65	5.4	0	Method or review paper
36707626	Germline rare deleterious variant load alters cancer risk, age of onset and tumor characteristics	Esai Selvan M	NPJ Precis Oncol	2023	1	1	1
23166519	A unified method for detecting secondary trait associations with rare variants: application to sequence data	Liu DJ	PLoS Genet	2012	4	0.3	-1
22549408	CNVs leading to fusion transcripts in individuals with autism spectrum disorder	Holt R	Eur J Hum Genet	2012	19	1.6	-1
23372912	Clear-cell variant urothelial carcinoma of the bladder: a case report and review of the literature	Kramer MW	Rare Tumors	2012	7	0.6	-1
22330174	Rare and common paraoxonase gene variants in amyotrophic lateral sclerosis patients	van Blitterswijk M	Neurobiol Aging	2012	7	0.6	-1
22711526	Detection of rare and possibly carcinogenic human papillomavirus genotypes as single infections in invasive cervical cancer	Geraets D	J Pathol	2012	19	1.6	-1
22169095	Rare copy number variants in tourette syndrome disrupt genes in histaminergic pathways and overlap with autism	Fernandez TV	Biol Psychiatry	2012	91	7.6	0	Copy number variants
22703173	The genetics of substance dependence	Wang JC	Annu Rev Genomics Hum Genet	2012	55	4.6	2	Method or review paper
22571619	Human papillomavirus type 58: the unique role in cervical cancers in East Asia	Chan PK	Cell Biosci	2012	27	2.2	-1
22912707	Comparison of statistical tests for association between rare variants and binary traits	Bacanu SA	PLoS One	2012	8	0.7	-1
37461109	Genetic characterization of dilated cardiomyopathy patients undergoing heart transplantation in the Chinese population by whole-exome sequencing	Lian H	J Transl Med	2023	1	1	1
22842386	Extremely rare giant retroperitoneal fibrolipoma: a case report	Chander B	J Cancer Res Ther	2012	8	0.7	-1
22384383	Genome-wide survey of large rare copy number variants in Alzheimer's disease among Caribbean hispanics	Ghani M	G3 (Bethesda)	2012	30	2.5	0	Copy number variants
22796794	Endoplasmic reticulum stress and inflammation	Adolph TE	Dig Dis	2012	29	2.4	-1
22745237	When genetic load does not correlate with phenotypic spectrum: lessons from the GnRH receptor (GNRHR)	Gianetti E	J Clin Endocrinol Metab	2012	22	1.8	-1
23594498	Does accounting for gene-environment interactions help uncover association between rare variants and complex diseases?	Kazma R	Hum Hered	2012	5	0.4	-1
22514657	Body integrity identity disorder	Blom RM	PLoS One	2012	19	1.6	-1
22174369	Mitochondrial DNA sequence variation and risk of pancreatic cancer	Lam ET	Cancer Res	2012	31	2.6	0	Not coding variant associations
23168490	Beyond the fourth wave of genome-wide obesity association studies	Sandholt CH	Nutr Diabetes	2012	32	2.7	0	Method or review paper
22589734	Genome-wide copy number analysis uncovers a new HSCR gene: NRG3	Tang CS	PLoS Genet	2012	29	2.4	-1
22412230	Rare variant of an anomalous left coronary artery: arising from the distal continuation of a single right coronary artery	Ghosh P	Tex Heart Inst J	2012	3	0.2	-1
22192860	Identification of rare and frequent variants of the CASR gene by high-resolution melting	Nissen PH	Clin Chim Acta	2012	9	0.8	-1
22045688	FZD6 is a novel gene for human neural tube defects	De Marco P	Hum Mutat	2012	43	3.6	2	Not gene-level associations
37456666	COVID-19 severity: does the genetic landscape of rare variants matter?	Khadzhieva MB	Front Genet	2023	1	1	1
23056206	Contribution of rare copy number variants to isolated human malformations	Serra-Juhé C	PLoS One	2012	14	1.2	-1
22693617	Association of estimated glomerular filtration rate and urinary uromodulin concentrations with rare variants identified by UMOD gene region sequencing	Köttgen A	PLoS One	2012	16	1.3	-1
22033228	Allelic and phenotypic spectrum of plasma triglycerides	Johansen CT	Biochim Biophys Acta	2012	16	1.3	-1
21465670	Zebrafish as a genomics model for human neurological and polygenic disorders	Becker TS	Dev Neurobiol	2012	16	1.3	-1
22256951	Blindly using Wald's test can miss rare disease-causal variants in case-control association studies	Xing G	Ann Hum Genet	2012	16	1.3	-1
22353194	Identification of genetic risk variants for deep vein thrombosis by multiplexed next-generation sequencing of 186 hemostatic/pro-inflammatory genes	Lotta LA	BMC Med Genomics	2012	14	1.2	-1
21895634	Recent genomic advances in schizophrenia	Doherty JL	Clin Genet	2012	35	2.9	0	Method or review paper
23594494	Rare variant association testing for next-generation sequencing data via hierarchical clustering	Tachmazidou I	Hum Hered	2012	2	0.2	-1
22699862	Optimal tests for rare variant effects in sequencing association studies	Lee S	Biostatistics	2012	373	31.1	0	Method or review paper
22582263	Recent explosive human population growth has resulted in an excess of rare genetic variants	Keinan A	Science	2012	273	22.8	0	Not coding variant associations
23046476	Whole-exome sequencing of a pedigree segregating asthma	DeWan AT	BMC Med Genet	2012	23	1.9	-1
22112808	Genetic defect in CYP24A1, the vitamin D 24-hydroxylase gene, in a patient with severe infantile hypercalcemia	Dauber A	J Clin Endocrinol Metab	2012	40	3.3	2	Not gene-level associations
24379824	Two-phase and family-based designs for next-generation sequencing studies	Thomas DC	Front Genet	2013	8	0.7	-1
24127788	Reduced burden of very large and rare CNVs in bipolar affective disorder	Grozeva D	Bipolar Disord	2013	17	1.5	-1
23303454	Rare pathogenic variants in IL36RN underlie a spectrum of psoriasis-associated pustular phenotypes	Setta-Kaffetzi N	J Invest Dermatol	2013	54	4.9	2	Not coding variant associations
23032573	Robust and powerful tests for rare variants using Fisher's method to combine evidence of association from two or more complementary tests	Derkach A	Genet Epidemiol	2013	48	4.4	0	Method or review paper
23375656	Refinement and discovery of new hotspots of copy-number variation associated with autism spectrum disorder	Girirajan S	Am J Hum Genet	2013	158	14.4	0	Copy number variants
23684009	Sequence kernel association tests for the combined effect of rare and common variants	Ionita-Laza I	Am J Hum Genet	2013	247	22.5	0	Method or review paper
25541630	Knowledge-constrained K-medoids Clustering of Regulatory Rare Alleles for Burden Tests	Sivley RM	Evol Comput Mach Learn Data Min Bioinform	2013	0	0	-1
24265830	Association testing strategy for data from dense marker panels	Lee D	PLoS One	2013	1	0.1	-1
36656851	Gene burden analysis identifies genes associated with increased risk and severity of adult-onset hearing loss in a diverse hospital-based cohort	Hui D	PLoS Genet	2023	1	1	1
24035194	Transmission disequilibrium of small CNVs in simplex autism	Krumm N	Am J Hum Genet	2013	57	5.2	0	Copy number variants
23201682	Analysis of 6,515 exomes reveals the recent origin of most human protein-coding variants	Fu W	Nature	2013	553	50.3	0	Method or review paper
23505263	Identification of rare copy number variants in high burden schizophrenia families	Van Den Bossche MJ	Am J Med Genet B Neuropsychiatr Genet	2013	14	1.3	-1
23637977	Gastrointestinal stromal tumors, somatic mutations and candidate genetic risk variants	O'Brien KM	PLoS One	2013	14	1.3	-1
23488912	Columnar cell variant of papillary thyroid carcinoma: a study of 10 cases with emphasis on CDX2 expression	Sujoy V	Thyroid	2013	13	1.2	-1
23830515	Intellectual disability is associated with increased runs of homozygosity in simplex autism	Gamsiz ED	Am J Hum Genet	2013	40	3.6	2	Not coding variant associations
23836555	VAAST 2.0: improved variant classification and disease-gene identification using a conservation-controlled amino acid substitution matrix	Hu H	Genet Epidemiol	2013	76	6.9	0	Method or review paper
23738568	The admixture maximum likelihood test to test for association between rare variants and disease phenotypes	Tyrer JP	BMC Bioinformatics	2013	12	1.1	-1
23417127	No association between general cognitive ability and rare copy number variation	McRae AF	Behav Genet	2013	11	1	-1
23424138	Using BioBin to explore rare variant population stratification	Moore CB	Pac Symp Biocomput	2013	11	1	-1
23675308	From mouse to human: evolutionary genomics analysis of human orthologs of essential genes	Georgi B	PLoS Genet	2013	113	10.3	0	Method or review paper
23685748	A functional variant in the CFI gene confers a high risk of age-related macular degeneration	van de Ven JP	Nat Genet	2013	102	9.3	2	Not gene-level associations
24098305	Combining genetic association study designs: a GWAS case study	Estus JL	Front Genet	2013	2	0.2	-1
23563609	Genome-wide SNP and CNV analysis identifies common and low-frequency variants associated with severe early-onset obesity	Wheeler E	Nat Genet	2013	150	13.6	0	Copy number variants
23302773	Clinical, imaging, and pathological heterogeneity of the Alzheimer's disease syndrome	Lam B	Alzheimers Res Ther	2013	134	12.2	0	Method or review paper
23768515	General framework for meta-analysis of rare variants in sequencing association studies	Lee S	Am J Hum Genet	2013	132	12	0	Method or review paper
23650101	Multiple genetic variant association testing by collapsing and kernel methods with pedigree or population structured data	Schaid DJ	Genet Epidemiol	2013	57	5.2	0	Method or review paper
23921847	Assessing the impact of population stratification on association studies of rare variation	Jiang Y	Hum Hered	2013	24	2.2	-1
24002087	A rare WNT1 missense variant overrepresented in ASD leads to increased Wnt signal pathway activation	Martin PM	Transl Psychiatry	2013	24	2.2	-1
24385916	Low frequency variants, collapsed based on biological knowledge, uncover complexity of population stratification in 1000 genomes project data	Moore CB	PLoS Genet	2013	23	2.1	-1
23160181	Novel common and rare genetic determinants of paraoxonase activity: FTO, SERPINA12, and ITGAL	Kim DS	J Lipid Res	2013	10	0.9	-1
23220596	Oncogenic osteomalacia -- hypophosphataemic spectrum from "benignancy" to "malignancy"	Chiam P	Bone	2013	10	0.9	-1
24330589	Renal mucinous tubular and spindle cell carcinoma: a report of 8 cases and review of the literature	Wu XR	Diagn Pathol	2013	11	1	-1
23607416	Common biological networks underlie genetic risk for alcoholism in African- and European-American populations	Kos MZ	Genes Brain Behav	2013	16	1.5	-1
24179658	Fatal malignant metastastic epithelioid angiomyolipoma presenting in a young woman: case report and review of the literature	Wyluda E	Rare Tumors	2013	5	0.5	-1
24073418	Increased Rate of Sporadic and Recurrent Rare Genic Copy Number Variants in Parkinson's Disease Among Ashkenazi Jews	Liu X	Mol Genet Genomic Med	2013	21	1.9	-1
23358228	A hybrid likelihood model for sequence-based disease association studies	Chen YC	PLoS Genet	2013	15	1.4	-1
23836590	Identification of grouped rare and common variants via penalized logistic regression	Ayers KL	Genet Epidemiol	2013	9	0.8	-1
37381728	Association of Rare Variants in ARSA with Parkinson's Disease	Senkevich K	Mov Disord	2023	1	1	1
23503723	Symmetric snapback primers for scanning and genotyping of the cystic fibrosis transmembrane conductance regulator gene	Zhou L	Clin Chem	2013	2	0.2	-1
23728934	Polygenic transmission and complex neuro developmental network for attention deficit hyperactivity disorder: genome-wide association study of both common and rare variants	Yang L	Am J Med Genet B Neuropsychiatr Genet	2013	88	8	2	Not coding variant associations
23714454	Prostate cancer screening in BRCA and Lynch syndrome mutation carriers	Castro E	Am Soc Clin Oncol Educ Book	2013	7	0.6	-1
23648131	Next-generation sequencing study finds an excess of rare, coding single-nucleotide variants of ADAMTS13 in patients with deep vein thrombosis	Lotta LA	J Thromb Haemost	2013	18	1.6	-1
23704978	Targeted deep resequencing identifies coding variants in the PEAR1 gene that play a role in platelet aggregation	Kim Y	PLoS One	2013	18	1.6	-1
23887159	Paratesticular rhabdomyoma: a morphologically distinct sclerosing variant	Jo VY	Am J Surg Pathol	2013	1	0.1	-1
23922232	In search of low-frequency and rare variants affecting complex traits	Panoutsopoulou K	Hum Mol Genet	2013	43	3.9	0	Method or review paper
23599503	A powerful and efficient set test for genetic markers that handles confounders	Listgarten J	Bioinformatics	2013	42	3.8	0	Method or review paper
23880793	Disentangling mechanisms involved in the adaptation of photosynthetic microorganisms to the extreme sulphureous water from Los Baños de Vilo (S Spain)	del Mar Fernández-Arjona M	Microb Ecol	2013	4	0.4	-1
23280576	Sequence kernel association test for quantitative traits in family samples	Chen H	Genet Epidemiol	2013	146	13.3	0	Method or review paper
23426950	How I treat patients with indolent and smoldering mastocytosis (rare conditions but difficult to manage)	Pardanani A	Blood	2013	28	2.5	0	Method or review paper
23720162	SBERIA: set-based gene-environment interaction test for rare and common variants in complex diseases	Jiao S	Genet Epidemiol	2013	27	2.5	0	Method or review paper
23633496	Rare APOA5 promoter variants associated with paradoxical HDL cholesterol decrease in response to fenofibric acid therapy	Brautbar A	J Lipid Res	2013	4	0.4	-1
23637302	Emergence of a new norovirus GII.4 variant and changes in the historical biennial pattern of norovirus outbreak activity in Alberta, Canada, from 2008 to 2013	Hasing ME	J Clin Microbiol	2013	30	2.7	2	Not coding variant associations
23819467	BioBin: a bioinformatics tool for automating the binning of rare variants using publicly available biological knowledge	Moore CB	BMC Med Genomics	2013	29	2.6	0	Method or review paper
37558884	Converging evidence from exome sequencing and common variants implicates target genes for osteoporosis	Zhou S	Nat Genet	2023	1	1	1
24034507	An EM algorithm based on an internal list for estimating haplotype distributions of rare variants from pooled genotype data	Kuk AY	BMC Genet	2013	2	0.2	-1
23661355	Warthin-like papillary carcinoma of the thyroid: a case series and review of the literature	Erşen A	Turk Patoloji Derg	2013	9	0.8	-1
23989711	Genetic cardiomyopathies causing heart failure	Cahill TJ	Circ Res	2013	73	6.6	0	Method or review paper
24065985	A stochastic inference of de novo CNV detection and association test in multiplex schizophrenia families	Wang SH	Front Genet	2013	0	0	-1
23483651	A unified mixed-effects model for rare-variant association in sequencing studies	Sun J	Genet Epidemiol	2013	72	6.5	0	Method or review paper
23582655	Variants in triggering receptor expressed on myeloid cells 2 are associated with both behavioral variant frontotemporal lobar degeneration and Alzheimer's disease	Giraldo M	Neurobiol Aging	2013	71	6.5	0	Not coding variant associations
37451613	Association Analyses of Predicted Loss-of-Function Variants Prioritized 15 Genes as Blood Pressure Regulators	Lecluze E	Can J Cardiol	2023	1	1	1
24130119	Functional linear models for association analysis of quantitative traits	Fan R	Genet Epidemiol	2013	38	3.5	0	Method or review paper
23529756	Adjusted sequence kernel association test for rare variants controlling for cryptic and family relatedness	Oualkacha K	Genet Epidemiol	2013	37	3.4	0	Method or review paper
38090255	Analysis of Rare Variants in 470,000 Exome-Sequenced UK Biobank Participants Implicates Novel Genes Affecting Risk of Hypertension	Curtis D	Pulse (Basel)	2023	1	1	1
24121729	Epistasis in iron metabolism: complex interactions between Cp, Mon1a, and Slc40a1 loci and tissue iron in mice	Delaby C	Mamm Genome	2013	0	0	-1
23591632	Maternal coding variants in complement receptor 1 and spontaneous idiopathic preterm birth	McElroy JJ	Hum Genet	2013	26	2.4	-1
23857046	Alzheimer disease: 'generation next' in Alzheimer disease genetic studies	Apostolova LG	Nat Rev Neurol	2013	1	0.1	-1
23505257	Congruency in the prediction of pathogenic missense mutations: state-of-the-art web-based tools	Castellana S	Brief Bioinform	2013	54	4.9	0	Method or review paper
24075185	Reliable identification of genomic variants from RNA-seq data	Piskol R	Am J Hum Genet	2013	184	16.7	0	Method or review paper
23608917	Whole-exome sequencing and imaging genetics identify functional variants for rate of change in hippocampal volume in mild cognitive impairment	Nho K	Mol Psychiatry	2013	53	4.8	2	Not gene-level associations
23142943	Clinical and histopathological study of Charcot-Marie-Tooth neuropathy with a novel S90W mutation in BSCL2	Choi BO	Neurogenetics	2013	17	1.5	-1
23819870	Identifying Mendelian disease genes with the variant effect scoring tool	Carter H	BMC Genomics	2013	238	21.6	0	Method or review paper
23856246	The exomes of the NCI-60 panel: a genomic resource for cancer biology and systems pharmacology	Abaan OD	Cancer Res	2013	153	13.9	0	Method or review paper
23255827	Mutation of the PDGFRB gene as a cause of idiopathic basal ganglia calcification	Nicolas G	Neurology	2013	121	11	3	Can't access
36920900	Whole exome sequencing study identifies candidate loss of function variants and locus heterogeneity in familial cholesteatoma	Cardenas R	PLoS One	2023	1	1	1
24338936	A powerful association test of multiple genetic variants using a random-effects model	Cheng KF	Stat Med	2014	1	0.1	-1
25519311	Multiphase analysis by linkage, quantitative transmission disequilibrium, and measured genotype: systolic blood pressure in complex Mexican American pedigrees	Chen Z	BMC Proc	2014	1	0.1	-1
23008149	Cytologic features of fibrolamellar carcinoma with mucin production: a rare variant of combined hepatocellular-cholangiocarcinoma	Rosa M	Diagn Cytopathol	2014	1	0.1	-1
25519325	Analysis of Genetic Analysis Workshop 18 data with gene-based penalized regression	Ayers KL	BMC Proc	2014	1	0.1	-1
25434007	A rare functional noncoding variant at the GWAS-implicated MIR137/MIR2682 locus might confer risk to schizophrenia and bipolar disorder	Duan J	Am J Hum Genet	2014	57	5.7	0	Not coding variant associations
37494930	An allelic-series rare-variant association test for candidate-gene discovery	McCaw ZR	Am J Hum Genet	2023	1	1	1
24581740	A higher mutational burden in females supports a "female protective model" in neurodevelopmental disorders	Jacquemont S	Am J Hum Genet	2014	251	25.1	2	Not coding variant associations
37667186	Gene-based burden scores identify rare variant associations for 28 blood biomarkers	Aldisi R	BMC Genom Data	2023	1	1	1
25541952	Adaptive combination of P-values for family-based association testing with sequence data	Lin WY	PLoS One	2014	1	0.1	-1
24846913	[Fine mapping of complex disease susceptibility loci]	Song Q	Yi Chuan	2014	0	0	-1
24719390	Bayesian latent variable collapsing model for detecting rare variant interaction effect in twin study	He L	Genet Epidemiol	2014	0	0	-1
25331574	A weighted U-statistic for genetic association analyses of sequencing data	Wei C	Genet Epidemiol	2014	8	0.8	-1
25112195	Pathway analysis approaches for rare and common variants: insights from Genetic Analysis Workshop 18	Aslibekyan S	Genet Epidemiol	2014	8	0.8	-1
25401757	Community based case-control study of rotavirus gastroenteritis among young children during 2008-2010 reveals vast genetic diversity and increased prevalence of G9 strains in Kolkata	Mullick S	PLoS One	2014	8	0.8	-1
25112183	Methods for collapsing multiple rare variants in whole-genome sequence data	Sung YJ	Genet Epidemiol	2014	8	0.8	-1
24959832	Associations of NINJ2 sequence variants with incident ischemic stroke in the Cohorts for Heart and Aging in Genomic Epidemiology (CHARGE) consortium	Bis JC	PLoS One	2014	7	0.7	-1
24163246	CNV analysis in a large schizophrenia sample implicates deletions at 16p12.1 and SLC1A1 and duplications at 1p36.33 and CGNL1	Rees E	Hum Mol Genet	2014	46	4.6	2	Copy number variants
25538794	An integrated transcriptome and expressed variant analysis of sepsis survival and death	Tsalik EL	Genome Med	2014	45	4.5	0	Not coding variant associations
24746959	Recurrent CNVs and SNVs at the NPHP1 locus contribute pathogenic alleles to Bardet-Biedl syndrome	Lindstrand A	Am J Hum Genet	2014	44	4.4	0	Copy number variants
25112193	Longitudinal data analysis for genetic studies in the whole-genome sequencing era	Wu Z	Genet Epidemiol	2014	8	0.8	-1
24356988	A novel method for detecting uniparental disomy from trio genotypes identifies a significant excess in children with developmental disorders	King DA	Genome Res	2014	31	3.1	0	Method or review paper
24088914	Sclerosing rhabdomyosarcoma of a chest wall in an adult: a case report and review of the literature	Mikubo M	Ann Thorac Cardiovasc Surg	2014	3	0.3	-1
25519316	Comparing the power of family-based association tests for sequence data with applications in the GAW18 simulated data	Huang J	BMC Proc	2014	3	0.3	-1
25112187	Summary of results and discussions from the gene-based tests group at Genetic Analysis Workshop 18	Cordell HJ	Genet Epidemiol	2014	3	0.3	-1
24887202	Interpreting human genetic variation with in vivo zebrafish assays	Davis EE	Biochim Biophys Acta	2014	30	3	0	Method or review paper
24906858	Rare complement factor H variant associated with age-related macular degeneration in the Amish	Hoffman JD	Invest Ophthalmol Vis Sci	2014	29	2.9	0	Not gene-level associations
24445990	Copy number variants and therapeutic response to antidepressant medication in major depressive disorder	Tansey KE	Pharmacogenomics J	2014	8	0.8	-1
24563425	Reproductive fitness and genetic transmission of tetralogy of Fallot in the molecular age	Chin-Yee NJ	Circ Cardiovasc Genet	2014	8	0.8	-1
24916163	Methodology for the analysis of rare genetic variation in genome-wide association and re-sequencing studies of complex human traits	Moutsianas L	Brief Funct Genomics	2014	8	0.8	-1
24768551	Simulation of Finnish population history, guided by empirical genetic data, to assess power of rare-variant tests in Finland	Wang SR	Am J Hum Genet	2014	17	1.7	-1
25132070	Combining family- and population-based imputation data for association analysis of rare and common variants in large pedigrees	Saad M	Genet Epidemiol	2014	17	1.7	-1
25519353	Rare variant analysis of blood pressure phenotypes in the Genetic Analysis Workshop 18 whole genome sequencing data using sequence kernel association test	Mallaney C	BMC Proc	2014	4	0.4	-1
24768614	DRD1 rare variants associated with tardive-like dystonia: a pilot pathway sequencing study in dystonia	Groen JL	Parkinsonism Relat Disord	2014	4	0.4	-1
24706492	Nonsyndromic cleft lip with or without cleft palate: Increased burden of rare variants within Gremlin-1, a component of the bone morphogenetic protein 4 pathway	Al Chawa T	Birth Defects Res A Clin Mol Teratol	2014	12	1.2	-1
24212298	Lipoprotein lipase gene sequencing and plasma lipid profile	Pirim D	J Lipid Res	2014	12	1.2	-1
24839611	GRIN2A mutation and early-onset epileptic encephalopathy: personalized therapy with memantine	Pierson TM	Ann Clin Transl Neurol	2014	98	9.8	0	Not coding variant associations
24374240	Nature and nurture- genes and environment- predict onset and progression of macular degeneration	Sobrin L	Prog Retin Eye Res	2014	90	9	2	Method or review paper
24978900	Newborn screening for haemoglobinopathies by high performance liquid chromatography (HPLC): diagnostic utility of different approaches in resource-poor settings	Upadhye DS	Clin Chem Lab Med	2014	1	0.1	-1
37975850	Whole Genome Sequencing Identifies Novel Common and Low-Frequency Variants Associated With Age-Related Macular Degeneration	Acar IE	Invest Ophthalmol Vis Sci	2023	1	1	1
24529801	Rare copy number variation in treatment-resistant major depressive disorder	O'Dushlaine C	Biol Psychiatry	2014	32	3.2	0	Copy number variants
25260786	Use of a targeted, combinatorial next-generation sequencing approach for the study of bicuspid aortic valve	Bonachea EM	BMC Med Genomics	2014	32	3.2	2	Not gene-level associations
36755464	Rare and low-frequency coding genetic variants contribute to pediatric-onset multiple sclerosis	Horton MK	Mult Scler	2023	1	1	1
25789374	Use of next-generation DNA sequencing to analyze genetic variants in rheumatic disease	Wiley GB	Arthritis Res Ther	2014	4	0.4	-1
24482836	A variational Bayes discrete mixture test for rare variant association	Logsdon BA	Genet Epidemiol	2014	7	0.7	-1
25439097	A novel test for recessive contributions to complex diseases implicates Bardet-Biedl syndrome gene BBS10 in idiopathic type 2 diabetes and obesity	Lim ET	Am J Hum Genet	2014	19	1.9	-1
24799183	Meta-analysis of sequencing studies with heterogeneous genetic associations	Tang ZZ	Genet Epidemiol	2014	19	1.9	-1
25488777	Genetics of psoriatic arthritis	O'Rielly DD	Best Pract Res Clin Rheumatol	2014	18	1.8	-1
25244256	Functional analysis of variance for association studies	Vsevolozhskaya OA	PLoS One	2014	17	1.7	-1
25045619	The Genetics, Neurogenetics and Pharmacogenetics of Addiction	Demers CH	Curr Behav Neurosci Rep	2014	17	1.7	-1
24475178	Prevalence and evolution of low frequency HIV drug resistance mutations detected by ultra deep sequencing in patients experiencing first line antiretroviral therapy failure	Vandenhende MA	PLoS One	2014	22	2.2	-1
25309579	A comprehensive evaluation of collapsing methods using simulated and real data: excellent annotation of functionality and large sample sizes required	Dering C	Front Genet	2014	6	0.6	-1
24810602	Exome-wide association study of endometrial cancer in a multiethnic population	Chen MM	PLoS One	2014	6	0.6	-1
24573858	The total burden of rare, non-synonymous exome genetic variants is not associated with childhood or late-life cognitive ability	Marioni RE	Proc Biol Sci	2014	7	0.7	-1
25519417	Evaluation of gene-based association tests for analyzing rare variants using Genetic Analysis Workshop 18 data	Derkach A	BMC Proc	2014	7	0.7	-1
24796624	Growing recognition of the role for rare missense substitutions in breast cancer susceptibility	Tavtigian SV	Biomark Med	2014	15	1.5	-1
25203683	Generalized functional linear models for gene-based case-control association studies	Fan R	Genet Epidemiol	2014	15	1.5	-1
25117149	Likelihood ratio tests in rare variant detection for continuous phenotypes	Zeng P	Ann Hum Genet	2014	15	1.5	-1
24497650	Low-Frequency Copy-Number Variants and General Cognitive Ability: No Evidence of Association	Kirkpatrick RM	Intelligence	2014	9	0.9	-1
24951660	Sequence variation in TMEM18 in association with body mass index: Cohorts for Heart and Aging Research in Genomic Epidemiology (CHARGE) Consortium Targeted Sequencing Study	Liu CT	Circ Cardiovasc Genet	2014	6	0.6	-1
24120998	Candidate gene approach to identifying rare genetic variants associated with lone atrial fibrillation	Weeke P	Heart Rhythm	2014	6	0.6	-1
23928927	Renal epithelioid angiomyolipoma: a rare variant with unusual behavior	Hassan M	Int Urol Nephrol	2014	6	0.6	-1
25075118	FARVAT: a family-based rare variant association test	Choi S	Bioinformatics	2014	20	2	-1
25387710	In search of rare variants: preliminary results from whole genome sequencing of 1,325 individuals with psychophysiological endophenotypes	Vrieze SI	Psychophysiology	2014	20	2	-1
24728577	Clinical and molecular characterization of the BRCA2 p.Asn3124Ile variant reveals substantial evidence for pathogenic significance	Surowy HM	Breast Cancer Res Treat	2014	5	0.5	-1
25519320	Rare genetic variant analysis on blood pressure in related samples	Chen H	BMC Proc	2014	5	0.5	-1
24675868	Rare variants detection with kernel machine learning based on likelihood ratio test	Zeng P	PLoS One	2014	5	0.5	-1
25065727	A rare variant association test based on combinations of single-variant tests	Sha Q	Genet Epidemiol	2014	5	0.5	-1
25112186	Testing genetic association with rare and common variants in family data	Chen H	Genet Epidemiol	2014	4	0.4	-1
25175702	Identifying rare and common disease associated variants in genomic data using Parkinson's disease as a model	Lin YC	J Biomed Sci	2014	5	0.5	-1
25169066	Adjusting family relatedness in data-driven burden test of rare variants	Zhang Q	Genet Epidemiol	2014	5	0.5	-1
25519381	A comparative analysis of family-based and population-based association tests using whole genome sequence data	Zhou JJ	BMC Proc	2014	5	0.5	-1
24744770	Evaluating the impact of genotype errors on rare variant tests of association	Cook K	Front Genet	2014	5	0.5	-1
24704626	Rare LPL gene variants attenuate triglyceride reduction and HDL cholesterol increase in response to fenofibric acid therapy in individuals with mixed dyslipidemia	Gao F	Atherosclerosis	2014	10	1	-1
24482034	A generalized genetic random field method for the genetic association analysis of sequencing data	Li M	Genet Epidemiol	2014	11	1.1	-1
25228354	A genome-wide CNV analysis of schizophrenia reveals a potential role for a multiple-hit model	Rudd DS	Am J Med Genet B Neuropsychiatr Genet	2014	17	1.7	-1
24520335	Integration of sequence data from a Consanguineous family with genetic data from an outbred population identifies PLB1 as a candidate rheumatoid arthritis risk gene	Okada Y	PLoS One	2014	16	1.6	-1
25335167	Identifying rare variants for genetic risk through a combined pedigree and phenotype approach: application to suicide and asthma	Darlington TM	Transl Psychiatry	2014	5	0.5	-1
24995868	Targeted resequencing and systematic in vivo functional testing identifies rare variants in MEIS1 as significant contributors to restless legs syndrome	Schulte EC	Am J Hum Genet	2014	24	2.4	-1
24243664	Power of family-based association designs to detect rare variants in large pedigrees using imputed genotypes	Saad M	Genet Epidemiol	2014	23	2.3	-1
24454922	Rare variant association testing by adaptive combination of P-values	Lin WY	PLoS One	2014	23	2.3	-1
24416398	Role of the DLGAP2 gene encoding the SAP90/PSD-95-associated protein 2 in schizophrenia	Li JM	PLoS One	2014	23	2.3	-1
25205790	Increased frequency of de novo copy number variants in congenital heart disease by integrative analysis of single nucleotide polymorphism array and exome sequence data	Glessner JT	Circ Res	2014	131	13.1	0	Copy number variants
36845002	Exome-based genome-wide screening of rare variants associated with the risk of polycystic ovary syndrome	Tamaoka S	Reprod Med Biol	2023	1	1	1
24336170	Meta-analysis of gene-level tests for rare variant association	Liu DJ	Nat Genet	2014	121	12.1	0	Method or review paper
25519378	A generalized least-squares framework for rare-variant analysis in family data	Li D	BMC Proc	2014	1	0.1	-1
24362787	Recurrent episodes of hemorrhagic alveolitis in relapsing catastrophic antiphospholipid syndrome: the same side of the dark moon	Pieralli F	Clin Rheumatol	2014	2	0.2	-1
24248908	Robust rare variant association testing for quantitative traits in samples with related individuals	Jiang D	Genet Epidemiol	2014	35	3.5	0	Method or review paper
36789878	Evaluating High-Confidence Genes in Conotruncal Cardiac Defects by Gene Burden Analyses	Chui MMC	J Am Heart Assoc	2023	1	1	1
23164820	Genome-wide analysis of rare copy number variations reveals PARK2 as a candidate gene for attention-deficit/hyperactivity disorder	Jarick I	Mol Psychiatry	2014	34	3.4	0	Copy number variants
24735237	Cost-effectiveness of family history-based colorectal cancer screening in Australia	Ouakrim DA	BMC Cancer	2014	9	0.9	-1
25041903	TARV: tree-based analysis of rare variants identifying risk modifying variants in CTNNA2 and CNTNAP2 for alcohol addiction	Song C	Genet Epidemiol	2014	10	1	-1
24471563	The influence of rare genetic variation in SLC30A8 on diabetes incidence and β-cell function	Billings LK	J Clin Endocrinol Metab	2014	10	1	-1
25115286	Determinants of outcome of solitary fibrous tumors of the pleura: an observational cohort study	Franzen D	BMC Pulm Med	2014	11	1.1	-1
25056720	High burden of private mutations due to explosive human population growth and purifying selection	Gao F	BMC Genomics	2014	13	1.3	-1
24786518	Allelic expression of deleterious protein-coding variants across human tissues	Kukurba KR	PLoS Genet	2014	38	3.8	0	Not coding variant associations
25472840	Functionally compromised CHD7 alleles in patients with isolated GnRH deficiency	Balasubramanian R	Proc Natl Acad Sci U S A	2014	37	3.7	2	Not coding variant associations
24464521	Sequence kernel association test for survival traits	Chen H	Genet Epidemiol	2014	36	3.6	0	Method or review paper
25112188	Population-based association and gene by environment interactions in Genetic Analysis Workshop 18	Satten GA	Genet Epidemiol	2014	2	0.2	-1
25519366	Small sample properties of rare variant analysis methods	Swartz MD	BMC Proc	2014	2	0.2	-1
24925152	Genetics of common malformations	Graham JM Jr	Eur J Med Genet	2014	2	0.2	-1
24831820	A powerful and adaptive association test for rare variants	Pan W	Genetics	2014	101	10.1	0	Method or review paper
24894501	RAREMETAL: fast and powerful meta-analysis for rare variants	Feng S	Bioinformatics	2014	67	6.7	0	Method or review paper
25062598	Copy number variation in obsessive-compulsive disorder and tourette syndrome: a cross-disorder study	McGrath LM	J Am Acad Child Adolesc Psychiatry	2014	66	6.6	0	Copy number variants
23689535	High rate of disease-related copy number variations in childhood onset schizophrenia	Ahn K	Mol Psychiatry	2014	65	6.5	0	Copy number variants
23999528	Exome sequencing in multiplex autism families suggests a major role for heterozygous truncating mutations	Toma C	Mol Psychiatry	2014	63	6.3	2	Not gene-level associations
24847005	Whole-exome sequencing identifies rare, functional CFH variants in families with macular degeneration	Yu Y	Hum Mol Genet	2014	62	6.2	2	Not gene-level associations
37107537	Children with Early-Onset Psychosis Have Increased Burden of Rare GRIN2A Variants	Hojlo MA	Genes (Basel)	2023	1	1	1
24262182	Genetics of Parkinson's disease--state of the art, 2013	Bonifati V	Parkinsonism Relat Disord	2014	83	8.3	0	Method or review paper
25504234	Rare variant testing of imputed data: an analysis pipeline typified	Drichel D	Hum Hered	2014	0	0	-1
24647240	[Frontal variant of frontotemporal dementia]	Boutoleau-Bretonniere C	Geriatr Psychol Neuropsychiatr Vieil	2014	0	0	-1
25132214	Characterizing genetic variation of adrenergic signalling pathways in Takotsubo (stress) cardiomyopathy exomes	Goodloe AH	Eur J Heart Fail	2014	11	1.1	-1
25267259	Targeted exon sequencing fails to identify rare coding variants with large effect in rheumatoid arthritis	Bang SY	Arthritis Res Ther	2014	14	1.4	-1
24398795	Analysis of rare variant population structure in Europeans explains differential stratification of gene-based tests	Zawistowski M	Eur J Hum Genet	2014	13	1.3	-1
25192044	Transcriptome sequencing of a large human family identifies the impact of rare noncoding variants	Li X	Am J Hum Genet	2014	39	3.9	0	Not coding variant associations
24731657	The polygenic nature of hypertriglyceridaemia: implications for definition, diagnosis, and management	Hegele RA	Lancet Diabetes Endocrinol	2014	152	15.2	0	Method or review paper
24995866	Rare-variant association analysis: study designs and statistical tests	Lee S	Am J Hum Genet	2014	494	49.4	0	Method or review paper
25277365	Performance of statistical methods on CHARGE targeted sequencing data	Xing C	BMC Genet	2014	0	0	-1
24852644	Mutation in TMEM98 in a large white kindred with autosomal dominant nanophthalmos linked to 17p12-q12	Awadalla MS	JAMA Ophthalmol	2014	29	2.9	2	Not gene-level associations
24836451	Neu-Laxova syndrome, an inborn error of serine metabolism, is caused by mutations in PHGDH	Shaheen R	Am J Hum Genet	2014	36	3.6	2	Not coding variant associations
24728188	No large-effect low-frequency coding variation found for myocardial infarction	Holmen OL	Hum Mol Genet	2014	8	0.8	-1
24866402	Investigation of TREM2, PLD3, and UNC5C variants in patients with Alzheimer's disease from mainland China	Jiao B	Neurobiol Aging	2014	35	3.5	3	Can't access
24594138	Pharmacogenomics of 17-alpha hydroxyprogesterone caproate for recurrent preterm birth prevention	Manuck TA	Am J Obstet Gynecol	2014	14	1.4	-1
24102379	Whole exome sequencing is an efficient and sensitive method for detection of germline mutations in patients with phaeochromcytomas and paragangliomas	McInerney-Leo AM	Clin Endocrinol (Oxf)	2014	14	1.4	-1
24151200	Whole exome sequencing identifies variation in CYB5A and RNF10 associated with adiposity and type 2 diabetes	Huang K	Obesity (Silver Spring)	2014	18	1.8	-1
24817515	Rare variants and autoimmune disease	Massey J	Brief Funct Genomics	2014	3	0.3	-1
25755899	Serum total tryptase level confirms itself as a more reliable marker of mast cells burden in mast cell leukaemia (aleukaemic variant)	Savini P	Case Rep Hematol	2015	3	0.3	-1
26315111	A genome-wide assessment of rare copy number variants in colorectal cancer	Li Z	Oncotarget	2015	8	0.9	-1
26431523	A New Method for Detecting Associations with Rare Copy-Number Variants	Tzeng JY	PLoS Genet	2015	8	0.9	-1
26040335	Genetic Variation in Cardiomyopathy and Cardiovascular Disorders	McNally EM	Circ J	2015	8	0.9	-1
26740853	Rare variant testing across methods and thresholds using the multi-kernel sequence kernel association test (MK-SKAT)	Urrutia E	Stat Interface	2015	7	0.8	-1
25626708	Resequencing of LPL in African Blacks and associations with lipoprotein-lipid levels	Pirim D	Eur J Hum Genet	2015	8	0.9	-1
26282998	A Novel Statistic for Global Association Testing Based on Penalized Regression	Austin E	Genet Epidemiol	2015	1	0.1	-1
25005592	Sequencing and expression analyses of the synaptic lipid raft adapter gene PAG1 in schizophrenia	Balan S	J Neural Transm (Vienna)	2015	1	0.1	-1
25656289	Duplications in ADHD patients harbour neurobehavioural genes that are co-expressed with genes associated with hyperactivity in the mouse	Taylor A	Am J Med Genet B Neuropsychiatr Genet	2015	1	0.1	-1
37072623	Common and rare variants associated with cardiometabolic traits across 98,622 whole-genome sequences in the All of Us research program	Wang X	J Hum Genet	2023	1	1	1
25338720	minimac2: faster genotype imputation	Fuchsberger C	Bioinformatics	2015	297	33	0	Method or review paper
26200269	Unique Genetic and Survival Characteristics of Invasive Mucinous Adenocarcinoma of the Lung	Shim HS	J Thorac Oncol	2015	88	9.8	0	Method or review paper
26191301	Epithelioid inflammatory myofibroblastic sarcoma with recurrence after extensive resection: significant clinicopathologic characteristics of a rare aggressive soft tissue neoplasm	Zhou J	Int J Clin Exp Pathol	2015	12	1.3	-1
26438243	A particular silent codon exchange in a recombinant gene greatly influences host cell metabolic activity	Rahmen N	Microb Cell Fact	2015	12	1.3	-1
36804966	Identification of the BTN3A3 Gene as a Molecule Implicated in Generalized Pustular Psoriasis in a Chinese Population	Zhang Q	J Invest Dermatol	2023	1	1	1
36890159	Imputation-powered whole-exome analysis identifies genes associated with kidney function and disease in the UK Biobank	Wuttke M	Nat Commun	2023	1	1	1
25887117	Copy number variants encompassing Mendelian disease genes in a large multigenerational family segregating bipolar disorder	Kember RL	BMC Genet	2015	12	1.3	-1
36464806	Whole-exome rare-variant analysis of Alzheimer's disease and related biomarker traits	K√º√ß√ºkali F	Alzheimers Dement	2023	1	1	1
25424174	Detection and correction of artefacts in estimation of rare copy number variants and analysis of rare deletions in type 1 diabetes	Cooper NJ	Hum Mol Genet	2015	13	1.4	-1
26411346	Rare Variants in PLD3 Do Not Affect Risk for Early-Onset Alzheimer Disease in a European Consortium Cohort	Cacace R	Hum Mutat	2015	12	1.3	-1
25744449	Exome sequencing to detect rare variants associated with general cognitive ability: a pilot study	Luciano M	Twin Res Hum Genet	2015	4	0.4	-1
25943776	Clinical and parental age characteristics of rare copy number variant burden in patients with schizophrenia	Martin AK	Am J Med Genet B Neuropsychiatr Genet	2015	4	0.4	-1
25227141	The dystrophin gene and cognitive function in the general population	Vojinovic D	Eur J Hum Genet	2015	4	0.4	-1
26231429	PBAP: a pipeline for file processing and quality control of pedigree data with dense genetic markers	Nato AQ Jr	Bioinformatics	2015	5	0.6	-1
25577150	Interferon-λ4 is a cell-autonomous type III interferon associated with pre-treatment hepatitis C virus burden	Lu YF	Virology	2015	24	2.7	0	Method or review paper
26555887	Investigating the role of filamin C in Belgian patients with frontotemporal dementia linked to GRN deficiency in FTLD-TDP brains	Janssens J	Acta Neuropathol Commun	2015	5	0.6	-1
25632026	Exome sequencing in suspected monogenic dyslipidemias	Stitziel NO	Circ Cardiovasc Genet	2015	20	2.2	-1
26447148	Genetics of male infertility: from research to clinic	Krausz C	Reproduction	2015	55	6.1	0	Method or review paper
26068625	Sarcomatoid urothelial carcinoma of the bladder: a contemporary clinicopathologic analysis of 37 cases	Fatima N	Can J Urol	2015	10	1.1	-1
37601970	Large-scale exome sequence analysis identifies sex- and age-specific determinants of obesity	Kaisinger LR	Cell Genom	2023	2	2	1
26426897	Likelihood ratio and score burden tests for detecting disease-associated rare variants	Lee W	Stat Appl Genet Mol Biol	2015	1	0.1	-1
25294124	An exome study of Parkinson's disease in Sardinia, a Mediterranean genetic isolate	Quadri M	Neurogenetics	2015	11	1.2	-1
25943950	Resequencing and association analysis of coding regions at twenty candidate genes suggest a role for rare risk variation at AKAP9 and protective variation at NRXN1 in schizophrenia susceptibility	Suárez-Rama JJ	J Psychiatr Res	2015	10	1.1	-1
26039597	Mutation burden of rare variants in schizophrenia candidate genes	Girard SL	PLoS One	2015	10	1.1	-1
26010658	A genome-wide copy number variant study of suicidal behavior	Gross JA	PLoS One	2015	10	1.1	-1
27081536	Novel rare variations of the oxytocin receptor (OXTR) gene in autism spectrum disorder individuals	Liu X	Hum Genome Var	2015	6	0.7	-1
25656819	Association of genetic variants of GRIN2B with autism	Pan Y	Sci Rep	2015	22	2.4	-1
26164125	Compound heterozygous NOTCH1 mutations underlie impaired cardiogenesis in a patient with hypoplastic left heart syndrome	Theis JL	Hum Genet	2015	39	4.3	3	Can't access
26016412	Aggregation of rare/low-frequency variants of the mitochondria respiratory chain-related proteins in rheumatoid arthritis patients	Mitsunaga S	J Hum Genet	2015	14	1.6	-1
25895113	Exome analysis of patients with concurrent pediatric inflammatory bowel disease and autoimmune disease	Andreoletti G	Inflamm Bowel Dis	2015	13	1.4	-1
25904937	PCSK9 variation and association with blood pressure in African Americans: preliminary findings from the HyperGEN and REGARDS studies	Tran NT	Front Genet	2015	13	1.4	-1
26465396	TUBA4A may not be a significant genetic factor in Chinese ALS patients	Li J	Amyotroph Lateral Scler Frontotemporal Degener	2015	6	0.7	-1
25817274	Investigation of Recessive Effects in Schizophrenia Using Next-Generation Exome Sequence Data	Curtis D	Ann Hum Genet	2015	6	0.7	-1
26022996	Transcriptome outlier analysis implicates schizophrenia susceptibility genes and enriches putatively functional rare genetic variants	Duan J	Hum Mol Genet	2015	7	0.8	-1
25668434	The relative contribution of common and rare genetic variants to ADHD	Martin J	Transl Psychiatry	2015	37	4.1	2	Not gene-level associations
25809955	Pleiotropy analysis of quantitative traits at gene level by multivariate functional linear models	Wang Y	Genet Epidemiol	2015	36	4	0	Method or review paper
25450229	The contribution of rare and common variants in 30 genes to risk nicotine dependence	Yang J	Mol Psychiatry	2015	39	4.3	2	Not gene-level associations
26823889	Epithelioid inflammatory myofibroblastic sarcoma treated with ALK inhibitor: a case report and review of literature	Liu Q	Int J Clin Exp Pathol	2015	16	1.8	-1
26158538	Genome-wide burden of deleterious coding variants increased in schizophrenia	Loohuis LMO	Nat Commun	2015	16	1.8	-1
26113603	Fine mapping of the uterine leiomyoma locus on 1q43 close to a lncRNA in the RGS7-FH interval	Aissani B	Endocr Relat Cancer	2015	2	0.2	-1
25791560	Undifferentiated (spindle cell) pancreatic carcinoma: a case report with osteochondroid differentiation	Wang X	JOP	2015	2	0.2	-1
25904936	Associating rare genetic variants with human diseases	Zhang Q	Front Genet	2015	2	0.2	-1
25783485	Performance of case-control rare copy number variation annotation in classification of autism	Engchuan W	BMC Med Genomics	2015	7	0.8	-1
25875492	Kullback-Leibler distance methods for detecting disease association with rare variants from sequencing data	Turkmen AS	Ann Hum Genet	2015	7	0.8	-1
25641098	Aminoglycoside-enabled elucidation of bacterial persister metabolism	Orman MA	Curr Protoc Microbiol	2015	7	0.8	-1
26394601	Family-based genome scan for age at onset of late-onset Alzheimer's disease in whole exome sequencing data	Saad M	Genes Brain Behav	2015	7	0.8	-1
26219265	Concurrent DNA Copy-Number Alterations and Mutations in Genes Related to Maintenance of Genome Stability in Uninvolved Mammary Glandular Tissue from Breast Cancer Patients	Ronowicz A	Hum Mutat	2015	7	0.8	-1
26501104	Genome-wide Polygenic Burden of Rare Deleterious Variants in Sudden Unexpected Death in Epilepsy	Leu C	EBioMedicine	2015	20	2.2	-1
25929351	Malignant peripheral nerve sheath tumor (MPNST) arising in diffuse-type neurofibroma: clinicopathologic characterization in a series of 9 cases	Schaefer IM	Am J Surg Pathol	2015	19	2.1	-1
26191315	Occult oncocytic papillary thyroid carcinoma with lymphoid stroma (Warthin-like tumor): report of a case with concomitant mutations of BRAF V600E and V600K	Han F	Int J Clin Exp Pathol	2015	7	0.8	-1
37562656	Role of TET1-mediated epigenetic modulation in Alzheimer's disease	Armstrong MJ	Neurobiol Dis	2023	2	2	1
25629170	Imputation of the rare HOXB13 G84E mutation and cancer risk in a large population-based cohort	Hoffmann TJ	PLoS Genet	2015	26	2.9	2	Not coding variant associations
26147384	Exome sequencing in seven families and gene-based association studies indicate genetic heterogeneity and suggest possible candidates for fibromuscular dysplasia	Kiando SR	J Hypertens	2015	15	1.7	-1
25799106	A statistical approach for rare-variant association testing in affected sibships	Epstein MP	Am J Hum Genet	2015	16	1.8	-1
25791389	A Sequence Kernel Association Test for Dichotomous Traits in Family Samples under a Generalized Linear Mixed Model	Yan Q	Hum Hered	2015	16	1.8	-1
26111046	Region-Based Association Test for Familial Data under Functional Linear Models	Svishcheva GR	PLoS One	2015	15	1.7	-1
26450338	Strategies for Imputing and Analyzing Rare Variants in Association Studies	Hoffmann TJ	Trends Genet	2015	16	1.8	-1
25873013	Collapsed haplotype pattern method for linkage analysis of next-generation sequence data	Wang GT	Eur J Hum Genet	2015	16	1.8	-1
25370044	No evidence for rare recessive and compound heterozygous disruptive variants in schizophrenia	Ruderfer DM	Eur J Hum Genet	2015	16	1.8	-1
37024536	Exploring the genetic and genomic connection underlying neurodegeneration with brain iron accumulation and the risk for Parkinson's disease	Alvarez Jerez P	NPJ Parkinsons Dis	2023	2	2	1
25635822	Exome sequencing of 75 individuals from multiply affected coeliac families and large scale resequencing follow up	Mistry V	PLoS One	2015	4	0.4	-1
26713451	Variants in the ASB10 Gene Are Associated with Primary Open Angle Glaucoma	Micheal S	PLoS One	2015	4	0.4	-1
25517950	Microcystic meningioma of the calvarium: a series of 9 cases and review of the literature	Velázquez Vega JE	Am J Surg Pathol	2015	3	0.3	-1
26066993	Burden of Common Complex Disease Variants in the Exomes of Two Healthy Centenarian Brothers	Tindale LC	Gerontology	2015	4	0.4	-1
26384369	Whole-Genome Sequencing Suggests Schizophrenia Risk Mechanisms in Humans with 22q11.2 Deletion Syndrome	Merico D	G3 (Bethesda)	2015	32	3.6	2	Not gene-level associations
25341113	Contribution of copy-number variation to Down syndrome-associated atrioventricular septal defects	Ramachandran D	Genet Med	2015	14	1.6	-1
25765051	The role of rare variants in systolic blood pressure: analysis of ExomeChip data in HyperGEN African Americans	Sung YJ	Hum Hered	2015	9	1	-1
25600597	Hepatitis B virus infection in post-vaccination South Africa: occult HBV infection and circulating surface gene variants	Amponsah-Dacosta E	J Clin Virol	2015	15	1.7	-1
25982957	Cumulative role of rare and common putative functional genetic variants at NPAS3 in schizophrenia susceptibility	González-Peñas J	Am J Med Genet B Neuropsychiatr Genet	2015	3	0.3	-1
26440553	Detecting association of rare and common variants by adaptive combination of P-values	Zhou Y	Genet Res (Camb)	2015	3	0.3	-1
26312685	Proliferating pilomatricoma--Case report	Kondo RN	An Bras Dermatol	2015	3	0.3	-1
25621769	Giant Hemosiderotic Dermatofibroma: The Largest Giant Dermatofibroma Reported to Date	Kalsi H	Am J Dermatopathol	2015	3	0.3	-1
25964309	Clinical and genetic analysis of patients with cystinuria in the United Kingdom	Rhodes HL	Clin J Am Soc Nephrol	2015	34	3.8	2	Not gene-level associations
26454253	Evaluating the Calibration and Power of Three Gene-Based Association Tests of Rare Variants for the X Chromosome	Ma C	Genet Epidemiol	2015	9	1	-1
26282996	Sequence Kernel Association Analysis of Rare Variant Set Based on the Marginal Regression Model for Binary Traits	Wu B	Genet Epidemiol	2015	8	0.9	-1
25652157	Targeted sequencing in chromosome 17q linkage region identifies familial glioma candidates in the Gliogene Consortium	Jalali A	Sci Rep	2015	8	0.9	-1
25582617	Increased female autosomal burden of rare copy number variants in human populations and in autism families	Desachy G	Mol Psychiatry	2015	30	3.3	0	Copy number variants
26123647	Rare Variants in the Epithelial Cadherin Gene Underlying the Genetic Etiology of Nonsyndromic Cleft Lip with or without Cleft Palate	Brito LA	Hum Mutat	2015	28	3.1	3	Can't access
26257172	Exome Sequence Analysis Suggests that Genetic Burden Contributes to Phenotypic Variability and Complex Neuropathy	Gonzaga-Jauregui C	Cell Rep	2015	138	15.3	2	Not gene-level associations
37804111	Machine learning nominates the inositol pathway and novel genes in Parkinson's disease	Yu E	Brain	2024	2	2	1
25395270	Hierarchical Bayesian model for rare variant association analysis integrating genotype uncertainty in human sequence data	He L	Genet Epidemiol	2015	5	0.6	-1
25726360	Rare structural genetic variation in human prion diseases	Lukic A	Neurobiol Aging	2015	5	0.6	-1
25569433	Assessment of incidental findings in 232 whole-exome sequences from the Baylor-Hopkins Center for Mendelian Genomics	Jurgens J	Genet Med	2015	24	2.7	2	Not gene-level associations
25740221	Methods for association analysis and meta-analysis of rare variants in families	Feng S	Genet Epidemiol	2015	11	1.2	-1
26569114	Genome-Wide Association Study of Staphylococcus aureus Carriage in a Community-Based Sample of Mexican-Americans in Starr County, Texas	Brown EL	PLoS One	2015	13	1.4	-1
26307204	An assessment of sex bias in neurodevelopmental disorders	Polyak A	Genome Med	2015	50	5.6	0	Not coding variant associations
26242638	Significance of what is not sampled: Characteristics of thyroid nonmicrocarcinomas (>1.0 cm) that were not targeted	Schoedel KE	Cancer Cytopathol	2015	0	0	-1
37301943	Rare genetic variants impact muscle strength	Huang Y	Nat Commun	2023	2	2	1
25906071	The power of gene-based rare variant methods to detect disease-associated variation and test hypotheses about complex disease	Moutsianas L	PLoS Genet	2015	80	8.9	0	Method or review paper
37079850	TRPA1 rare variants in chronic neuropathic and nociplastic pain patients	Marchi M	Pain	2023	2	2	1
36707629	FANCM missense variants and breast cancer risk: a case-control association study of 75,156 European women	Figlioli G	Eur J Hum Genet	2023	2	2	1
26261660	Invasive cystic hypersecretory carcinoma of the breast: a case report	Liu J	Int J Clin Exp Pathol	2015	0	0	-1
25583502	Integrative analysis of sequencing and array genotype data for discovering disease associations with rare mutations	Hu YJ	Proc Natl Acad Sci U S A	2015	11	1.2	-1
26367794	Whole-genome sequencing identifies EN1 as a determinant of bone density and fracture	Zheng HF	Nature	2015	277	30.8	2	Not gene-level associations
25954030	Mutation of the nuclear lamin gene LMNB2 in progressive myoclonus epilepsy with early ataxia	Damiano JA	Hum Mol Genet	2015	24	2.7	2	Not gene-level associations
25990554	The impact of DNA input amount and DNA source on the performance of whole-exome sequencing in cancer epidemiology	Zhu Q	Cancer Epidemiol Biomarkers Prev	2015	14	1.6	-1
25398898	CMPD: cancer mutant proteome database	Huang PJ	Nucleic Acids Res	2015	8	0.9	-1
24935720	PLD3 in Alzheimer's disease	Wang J	Mol Neurobiol	2015	10	1.1	-1
26544806	Association between Rare Variants in AP4E1, a Component of Intracellular Trafficking, and Persistent Stuttering	Raza MH	Am J Hum Genet	2015	33	3.7	2	Not gene-level associations
27498913	Monogenic and polygenic determinants of sarcoma risk: an international genetic study	Ballinger ML	Lancet Oncol	2016	85	10.6	3	Can't access
27569545	Rare Inherited and De Novo CNVs Reveal Complex Contributions to ASD Risk in Multiplex Families	Leppa VM	Am J Hum Genet	2016	84	10.5	0	Copy number variants
27616483	GRIN2D Recurrent De Novo Dominant Mutation Causes a Severe Epileptic Encephalopathy Treatable with NMDA Receptor Channel Blockers	Li D	Am J Hum Genet	2016	82	10.2	2	Not gene-level associations
27602560	Analysis of Intellectual Disability Copy Number Variants for Association With Schizophrenia	Rees E	JAMA Psychiatry	2016	62	7.8	0	Copy number variants
26699508	Bottlenecks and selective sweeps during domestication have increased deleterious genetic variation in dogs	Marsden CD	Proc Natl Acad Sci U S A	2016	133	16.6	0	Not coding variant associations
26959699	Clear-Cell Atypical Fibroxanthoma: A Combined Immunohistochemistry Analysis	Brau Javier CN	Am J Dermatopathol	2016	1	0.1	-1
27247418	Multidimensional structure-function relationships in human β-cardiac myosin from population-scale genetic variation	Homburger JR	Proc Natl Acad Sci U S A	2016	59	7.4	0	Not coding variant associations
37528149	Exome-wide association study of treatment-resistant depression suggests novel treatment targets	Shah SB	Sci Rep	2023	2	2	1
27646141	Boosting Gene Mapping Power and Efficiency with Efficient Exact Variance Component Tests of Single Nucleotide Polymorphism Sets	Zhou JJ	Genetics	2016	8	1	-1
27911851	Inherited variants affecting RNA editing may contribute to ovarian cancer susceptibility: results from a large-scale collaboration	Permuth JB	Oncotarget	2016	8	1	-1
26782979	Gene-Based Association Analysis for Censored Traits Via Fixed Effect Functional Regressions	Fan R	Genet Epidemiol	2016	9	1.1	-1
26508571	A general approach for combining diverse rare variant association tests provides improved robustness across a wider range of genetic architectures	Greco B	Eur J Hum Genet	2016	8	1	-1
26693933	Exome-based case-control association study using extreme phenotype design reveals novel candidates with protective effect in diabetic retinopathy	Shtir C	Hum Genet	2016	29	3.6	3	Can't access
27312771	Post hoc Analysis for Detecting Individual Rare Variant Risk Associations Using Probit Regression Bayesian Variable Selection Methods in Case-Control Sequencing Studies	Larson NB	Genet Epidemiol	2016	3	0.4	-1
26704054	Burden of potentially pathologic copy number variants is higher in children with isolated congenital heart disease and significantly impairs covariate-adjusted transplant-free survival	Kim DS	J Thorac Cardiovasc Surg	2016	27	3.4	0	Copy number variants
27903157	Obesity and Other Cancers	Yang L	J Clin Oncol	2016	27	3.4	0	Method or review paper
26590902	Fine mapping of chromosome 5p15.33 based on a targeted deep sequencing and high density genotyping identifies novel lung cancer susceptibility loci	Kachuri L	Carcinogenesis	2016	27	3.4	0	Not coding variant associations
26746786	Integrating 400 million variants from 80,000 human samples with extensive annotations: towards a knowledge base to analyze disease cohorts	Hakenberg J	BMC Bioinformatics	2016	8	1	-1
27827323	Sequence variation at KLK and WFDC clusters and its association to semen hyperviscosity and other male infertility phenotypes	Marques PI	Hum Reprod	2016	8	1	-1
26349998	Increased rare duplication burden genomewide in patients with treatment-resistant schizophrenia	Martin AK	Psychol Med	2016	17	2.1	-1
26683795	Resequencing of the CETP gene in American whites and African blacks: Association of rare and common variants with HDL-cholesterol levels	Pirim D	Metabolism	2016	9	1.1	-1
26784232	Detecting the Common and Individual Effects of Rare Variants on Quantitative Traits by Using Extreme Phenotype Sampling	Zhou YJ	Genes (Basel)	2016	3	0.4	-1
27798102	Additional rare variant analysis in Parkinson's disease cases with and without known pathogenic mutations: evidence for oligogenic inheritance	Lubbe SJ	Hum Mol Genet	2016	31	3.9	2	Not gene-level associations
26866982	Filtering genetic variants and placing informative priors based on putative biological function	Friedrichs S	BMC Genet	2016	3	0.4	-1
27292111	Boosting the Power of the Sequence Kernel Association Test by Properly Estimating Its Null Distribution	Wang K	Am J Hum Genet	2016	14	1.8	-1
27406185	Mucopolysaccharidosis I; Parental beliefs about the impact of disease on the quality of life of their children	Soni-Jaiswal A	Orphanet J Rare Dis	2016	10	1.2	-1
27267999	An exome-wide analysis of low frequency and rare variants in relation to risk of breast cancer in African American Women: the AMBER Consortium	Haddad SA	Carcinogenesis	2016	15	1.9	-1
27486019	Rare Variation in TET2 Is Associated with Clinically Relevant Prostate Carcinoma in African Americans	Koboldt DC	Cancer Epidemiol Biomarkers Prev	2016	15	1.9	-1
37344884	Whole genome sequencing across clinical trials identifies rare coding variants in GPR68 associated with chemotherapy-induced peripheral neuropathy	Khan Z	Genome Med	2023	3	3	1
26547207	Population-based frequency of surfactant dysfunction mutations in a native Chinese cohort	Chen YJ	World J Pediatr	2016	4	0.5	-1
27516387	Coding-sequence variants are associated with blood lipid levels in 14,473 Chinese	Lu X	Hum Mol Genet	2016	4	0.5	-1
28008202	Investigation of single-nucleotide variants in MBD5 associated with autism spectrum disorders and schizophrenia phenotypes	Ishizuka K	Nagoya J Med Sci	2016	4	0.5	-1
26783077	Generalization of Rare Variant Association Tests for Longitudinal Family Studies	Chien LC	Genet Epidemiol	2016	4	0.5	-1
26782911	Sequence Kernel Association Test of Multiple Continuous Phenotypes	Wu B	Genet Epidemiol	2016	28	3.5	0	Method or review paper
26613787	Population Structure Shapes Copy Number Variation in Malaria Parasites	Cheeseman IH	Mol Biol Evol	2016	28	3.5	0	Copy number variants
26742502	Rare copy number variants and congenital heart defects in the 22q11.2 deletion syndrome	Mlynarski EE	Hum Genet	2016	26	3.2	0	Copy number variants
27871494	Current surgical management of carotid body tumors	Davila VJ	J Vasc Surg	2016	25	3.1	0	Method or review paper
37348876	Large-scale rare variant burden testing in Parkinson's disease	Makarious MB	Brain	2023	3	3	1
26599574	Next-generation re-sequencing of genes involved in increased platelet reactivity in diabetic patients on acetylsalicylic acid	Postula M	Platelets	2016	4	0.5	-1
27393345	Genome-wide assessment of Parkinson's disease in a Southern Spanish population	Bandrés-Ciga S	Neurobiol Aging	2016	16	2	-1
37506195	The contributions of rare inherited and polygenic risk to ASD in multiplex families	Cirnigliaro M	Proc Natl Acad Sci U S A	2023	3	3	1
27587678	Pathway-based approach using hierarchical components of collapsed rare variants	Lee S	Bioinformatics	2016	19	2.4	-1
27485946	Sleep Disturbances in Frontotemporal Dementia	McCarter SJ	Curr Neurol Neurosci Rep	2016	27	3.4	0	Not coding variant associations
27373512	Genetic Complexity of Crohn's Disease in Two Large Ashkenazi Jewish Families	Levine AP	Gastroenterology	2016	27	3.4	2	Not gene-level associations
27378695	Exome genotyping arrays to identify rare and low frequency variants associated with epithelial ovarian cancer risk	Permuth JB	Hum Mol Genet	2016	7	0.9	-1
26639010	Meta-Analysis of Rare Variant Association Tests in Multiethnic Populations	Mensah-Ablorh A	Genet Epidemiol	2016	7	0.9	-1
27572114	Mapping rare, deleterious mutations in Factor H: Association with early onset, drusen burden, and lower antigenic levels in familial AMD	Wagner EK	Sci Rep	2016	36	4.5	2	Not gene-level associations
27592089	Hepatitis C virus: life cycle in cells, infection and host response, and analysis of molecular markers influencing the outcome of infection and response to therapy	Dustin LB	Clin Microbiol Infect	2016	34	4.2	0	Not coding variant associations
27085880	Evidence for Association Between Low Frequency Variants in CHRNA6/CHRNB3 and Antisocial Drug Dependence	Kamens HM	Behav Genet	2016	2	0.2	-1
27128313	A Protein Domain and Family Based Approach to Rare Variant Association Analysis	Richardson TG	PLoS One	2016	2	0.2	-1
27347071	Targeted deep resequencing of ALOX5 and ALOX5AP in patients with diabetes and association of rare variants with leukotriene pathways	Postula M	Exp Ther Med	2016	2	0.2	-1
27567292	Association of Rare Nonsynonymous Variants in PKD1 and PKD2 with Familial Intracranial Aneurysms in a Japanese Population	Hirota K	J Stroke Cerebrovasc Dis	2016	2	0.2	-1
36848389	Sub-cellular level resolution of common genetic variation in the photoreceptor layer identifies continuum between rare disease and common variation	Currant H	PLoS Genet	2023	3	3	1
36966328	Mutation screening of SPTLC1 and SPTLC2 in amyotrophic lateral sclerosis	Li C	Hum Genomics	2023	3	3	1
27703193	Genes implicated in thiopurine-induced toxicity: Comparing TPMT enzyme activity with clinical phenotype and exome data in a paediatric IBD cohort	Coelho T	Sci Rep	2016	18	2.2	-1
27917292	Deep resequencing of CFTR in 762 F508del homozygotes reveals clusters of non-coding variants associated with cystic fibrosis disease traits	Vecchio-Pagán B	Hum Genome Var	2016	17	2.1	-1
27980633	Comparing family-based rare variant association tests for dichotomous phenotypes	Wang L	BMC Proc	2016	7	0.9	-1
26525106	Update on Mastocytosis (Part 2): Categories, Prognosis, and Treatment	Azaña JM	Actas Dermosifiliogr	2016	7	0.9	-1
27238071	Whole-Exome Sequencing Reveals Increased Burden of Rare Functional and Disruptive Variants in Candidate Risk Genes in Individuals With Persistent Attention-Deficit/Hyperactivity Disorder	Demontis D	J Am Acad Child Adolesc Psychiatry	2016	19	2.4	-1
26981879	Pathway analysis of whole exome sequence data provides further support for the involvement of histone modification in the aetiology of schizophrenia	Curtis D	Psychiatr Genet	2016	13	1.6	-1
27146844	Very low-depth sequencing in a founder population identifies a cardioprotective APOC3 signal missed by genome-wide imputation	Gilly A	Hum Mol Genet	2016	13	1.6	-1
27584932	Rare genetic variation in UNC13A may modify survival in amyotrophic lateral sclerosis	Gaastra B	Amyotroph Lateral Scler Frontotemporal Degener	2016	13	1.6	-1
28011711	Protective coding variants in CFH and PELI3 and a variant near CTRB1 are associated with age-related macular degeneration†	Yu Y	Hum Mol Genet	2016	11	1.4	-1
37592023	Exome sequencing identifies breast cancer susceptibility genes and defines the contribution of coding variants to breast cancer risk	Wilcox N	Nat Genet	2023	3	3	1
27185616	Gender differences in CNV burden do not confound schizophrenia CNV associations	Han J	Sci Rep	2016	6	0.8	-1
27260402	Differential burden of rare protein truncating variants in Alzheimer's disease patients compared to centenarians	Freudenberg-Hua Y	Hum Mol Genet	2016	6	0.8	-1
27374056	A Comparison Study of Fixed and Mixed Effect Models for Gene Level Association Studies of Complex Traits	Fan R	Genet Epidemiol	2016	7	0.9	-1
26264438	Search for new loci and low-frequency variants influencing glioma risk by exome-array analysis	Kinnersley B	Eur J Hum Genet	2016	7	0.9	-1
27545677	Determinants of Power in Gene-Based Burden Testing for Monogenic Disorders	Guo MH	Am J Hum Genet	2016	22	2.8	0	Method or review paper
26338417	Comparison of haplotype-based statistical tests for disease association with rare and common variants	Datta AS	Brief Bioinform	2016	11	1.4	-1
27535542	Integration of bioinformatics and imaging informatics for identifying rare PSEN1 variants in Alzheimer's disease	Nho K	BMC Med Genomics	2016	10	1.2	-1
27572272	RHAPSODY - Internet-based support for caregivers of people with young onset dementia: program design and methods of a pilot study	Kurz A	Int Psychogeriatr	2016	11	1.4	-1
25963336	Genetic variation in uncontrolled childhood asthma despite ICS treatment	Leusink M	Pharmacogenomics J	2016	11	1.4	-1
27803446	Genetic Polymorphisms and in Vitro Functional Characterization of CYP2C8, CYP2C9, and CYP2C19 Allelic Variants	Hiratsuka M	Biol Pharm Bull	2016	10	1.2	-1
26229047	Test for rare variants by environment interactions in sequencing association studies	Lin X	Biometrics	2016	43	5.4	0	Method or review paper
26849112	A Burden of Rare Variants Associated with Extremes of Gene Expression in Human Peripheral Blood	Zhao J	Am J Hum Genet	2016	42	5.2	2	Not coding variant associations
27980639	A combined association test for rare variants using family and case-control data	Lin PL	BMC Proc	2016	2	0.2	-1
27199552	Machine Learning Data Imputation and Classification in a Multicohort Hypertension Clinical Study	Seffens W	Bioinform Biol Insights	2016	1	0.1	-1
37171956	Sequencing of 19,219 exomes identifies a low-frequency variant in FKBP5 promoter predisposing to high myopia in a Han Chinese population	Su J	Cell Rep	2023	4	4	1
36859317	Congenital hydrocephalus: new Mendelian mutations and evidence for oligogenic inheritance	Jacquemin V	Hum Genomics	2023	4	4	1
36493725	Inherited rare variants in homologous recombination and neurodevelopmental genes are associated with increased risk of neuroblastoma	Bonfiglio F	EBioMedicine	2023	5	5	1
26776200	BIOFILTER AS A FUNCTIONAL ANNOTATION PIPELINE FOR COMMON AND RARE COPY NUMBER BURDEN	Kim D	Pac Symp Biocomput	2016	2	0.2	-1
27980649	Incorporation of protein binding effects into likelihood ratio test for exome sequencing data	Zhang D	BMC Proc	2016	2	0.2	-1
27058611	De Novo and Rare Variants at Multiple Loci Support the Oligogenic Origins of Atrioventricular Septal Heart Defects	Priest JR	PLoS Genet	2016	56	7	2	Not coding variant associations
26390827	Common alleles contribute to schizophrenia in CNV carriers	Tansey KE	Mol Psychiatry	2016	51	6.4	0	Copy number variants
27147090	Association Tests for Rare Variants	Nicolae DL	Annu Rev Genomics Hum Genet	2016	21	2.6	0	Method or review paper
27152526	Testing Rare-Variant Association without Calling Genotypes Allows for Systematic Differences in Sequencing between Cases and Controls	Hu YJ	PLoS Genet	2016	21	2.6	0	Method or review paper
27664392	Systemic treatment and management approaches for medullary thyroid cancer	Ernani V	Cancer Treat Rev	2016	20	2.5	0	Method or review paper
26522186	Pilot whole-exome sequencing of a German early-onset Alzheimer's disease cohort reveals a substantial frequency of PSEN2 variants	Blauwendraat C	Neurobiol Aging	2016	20	2.5	3	Can't access
27654840	AP-SKAT: highly-efficient genome-wide rare variant association test	Hasegawa T	BMC Genomics	2016	6	0.8	-1
27625707	The C1431T polymorphism of peroxisome proliferator activated receptor γ (PPARγ) is associated with low risk of diabetes in a Pakistani cohort	Butt H	Diabetol Metab Syndr	2016	6	0.8	-1
26995215	Primary Plasma Cell Leukemia: Identity Card 2016	Musto P	Curr Treat Options Oncol	2016	6	0.8	-1
27351283	A comprehensive characterization of rare mitochondrial DNA variants in neuroblastoma	Calabrese FM	Oncotarget	2016	5	0.6	-1
27678522	On Robust Association Testing for Quantitative Traits and Rare Variants	Wei P	G3 (Bethesda)	2016	5	0.6	-1
26903168	Beyond Rare-Variant Association Testing: Pinpointing Rare Causal Variants in Case-Control Sequencing Study	Lin WY	Sci Rep	2016	12	1.5	-1
27296017	Rare variants in known and novel candidate genes predisposing to statin-associated myopathy	Neřoldová M	Pharmacogenomics	2016	12	1.5	-1
26378787	The role of combined SNV and CNV burden in patients with distal symmetric polyneuropathy	Pehlivan D	Genet Med	2016	12	1.5	-1
26216301	High-throughput sequencing of the synaptome in major depressive disorder	Pirooznia M	Mol Psychiatry	2016	12	1.5	-1
26776191	KNOWLEDGE DRIVEN BINNING AND PHEWAS ANALYSIS IN MARSHFIELD PERSONALIZED MEDICINE RESEARCH PROJECT USING BIOBIN	Basile AO	Pac Symp Biocomput	2016	12	1.5	-1
26866487	Progress in methods for rare variant association	Santorico SA	BMC Genet	2016	11	1.4	-1
27257017	CNV analysis in Chinese children of mental retardation highlights a sex differentiation in parental contribution to de novo and inherited mutational burdens	Wang B	Sci Rep	2016	11	1.4	-1
27980663	Association of rare haplotypes on ULK4 and MAP4 genes with hypertension	Datta AS	BMC Proc	2016	11	1.4	-1
26474449	Practical Experience of the Application of a Weighted Burden Test to Whole Exome Sequence Data for Obesity and Schizophrenia	Curtis D	Ann Hum Genet	2016	12	1.5	-1
26733288	The (in)famous GWAS P-value threshold revisited and updated for low-frequency variants	Fadista J	Eur J Hum Genet	2016	128	16	0	Method or review paper
27274215	Genes associated with Alzheimer's disease: an overview and current status	Giri M	Clin Interv Aging	2016	124	15.5	0	Method or review paper
27980646	Incorporating ENCODE information into association analysis of whole genome sequencing data	Kim T	BMC Proc	2016	5	0.6	-1
26757198	On Efficient and Accurate Calculation of Significance P-Values for Sequence Kernel Association Testing of Variant Set	Wu B	Ann Hum Genet	2016	12	1.5	-1
26964030	Gene and pathway level analyses of germline DNA-repair gene variants and prostate cancer susceptibility using the iCOGS-genotyping array	Saunders EJ	Br J Cancer	2016	12	1.5	-1
27464451	Rare mutations and hypermethylation of the ARC gene associated with schizophrenia	Chuang YA	Schizophr Res	2016	12	1.5	-1
27980631	The impact of genetic structure on sequencing analysis	Jadhav S	BMC Proc	2016	1	0.1	-1
26655088	Mutational landscape of MCPyV-positive and MCPyV-negative Merkel cell carcinomas with implications for immunotherapy	Goh G	Oncotarget	2016	162	20.2	0	Method or review paper
27694994	Increased burden of ultra-rare protein-altering variants among 4,877 individuals with schizophrenia	Genovese G	Nat Neurosci	2016	233	29.1	2	Not gene-level associations
27208204	Molecular findings from 537 individuals with inherited retinal disease	Ellingford JM	J Med Genet	2016	76	9.5	0	Not coding variant associations
26548329	Clinical applications of molecular genetic discoveries	Marian AJ	Transl Res	2016	0	0	-1
27355533	Efficacy and Safety of Midostaurin in Advanced Systemic Mastocytosis	Gotlib J	N Engl J Med	2016	173	21.6	0	Method or review paper
26864202	Genomic characterization of sarcomatoid transformation in clear cell renal cell carcinoma	Bi M	Proc Natl Acad Sci U S A	2016	56	7	0	Method or review paper
27777503	North Carolina macular dystrophy (MCDR1) caused by a novel tandem duplication of the PRDM13 gene	Bowne SJ	Mol Vis	2016	16	2	-1
27896285	Rare variants in optic disc area gene CARD10 enriched in primary open-angle glaucoma	Zhou T	Mol Genet Genomic Med	2016	8	1	-1
27431458	Whole-Exome Sequencing Suggests LAMB3 as a Susceptibility Gene for Morbid Obesity	Jiao H	Diabetes	2016	11	1.4	-1
36914870	Schizophrenia risk conferred by rare protein-truncating variants is conserved across diverse human populations	Liu D	Nat Genet	2023	6	6	1
26687033	Linking a genome-wide association study signal to a LRRK2 coding variant in Parkinson's disease	Foo JN	Mov Disord	2016	4	0.5	-1
27468420	Identification of genetic variants of LGI1 and RTN4R (NgR1) linked to schizophrenia that are defective in NgR1-LGI1 signaling	Thomas RA	Mol Genet Genomic Med	2016	3	0.4	-1
26604137	Whole-exome sequencing of over 4100 men of African ancestry and prostate cancer risk	Rand KA	Hum Mol Genet	2016	17	2.1	-1
27652278	Concordance between whole-exome sequencing and clinical Sanger sequencing: implications for patient care	Hamilton A	Mol Genet Genomic Med	2016	17	2.1	-1
27289440	ABCA7 p.G215S as potential protective factor for Alzheimer's disease	Sassi C	Neurobiol Aging	2016	18	2.2	-1
27679817	Single-neuron and genetic correlates of autistic behavior in macaque	Yoshida K	Sci Adv	2016	23	2.9	0	Not coding variant associations
26662719	Whole Exome Sequencing Identifies Rare Protein-Coding Variants in Beh√ßet's Disease	Ognenovski M	Arthritis Rheumatol	2016	2	0.2	-1
36755099	Polygenic architecture of rare coding variation across 394,783 exomes	Weiner DJ	Nature	2023	21	21	1
26791050	Primary Immunodeficiencies and Inflammatory Disease: A Growing Genetic Intersection	Fodil N	Trends Immunol	2016	25	3.1	0	Not coding variant associations
27060170	Whole-exome sequencing to identify genetic risk variants underlying inhibitor development in severe hemophilia A patients	Gorski MM	Blood	2016	14	1.8	-1
27436009	Excess of Deleterious Mutations around HLA Genes Reveals Evolutionary Cost of Balancing Selection	Lenz TL	Mol Biol Evol	2016	27	3.4	2	Not gene-level associations
27055460	Variants of PLCXD3 are not associated with variant or sporadic Creutzfeldt-Jakob disease in a large international study	Balendra R	BMC Med Genet	2016	1	0.1	-1
27624058	Immunoseq: the identification of functionally relevant variants through targeted capture and sequencing of active regulatory regions in human immune cells	Morin A	BMC Med Genomics	2016	20	2.5	0	Method or review paper
26892958	Genetics of Coronary Artery Disease	McPherson R	Circ Res	2016	146	18.2	0	Method or review paper
27228465	Navigating highly homologous genes in a molecular diagnostic setting: a resource for clinical next-generation sequencing	Mandelker D	Genet Med	2016	90	11.2	0	Method or review paper
27720020	Exome and genome sequencing for inborn errors of immunity	Meyts I	J Allergy Clin Immunol	2016	89	11.1	2	Method or review paper
28430790	Whole-genome sequencing suggests mechanisms for 22q11.2 deletion-associated Parkinson's disease	Butcher NJ	PLoS One	2017	12	1.7	-1
29090118	The Risks of Renal Angiomyolipoma: Reviewing the Evidence	Seyam RM	J Kidney Cancer VHL	2017	12	1.7	-1
28388887	A burden of rare variants in BMPR2 and KCNK3 contributes to a risk of familial pulmonary arterial hypertension	Higasa K	BMC Pulm Med	2017	13	1.9	-1
28489853	Novel genes involved in severe early-onset obesity revealed by rare copy number and sequence variants	Serra-Juhé C	PLoS Genet	2017	13	1.9	-1
28974706	Fine population structure analysis method for genomes of many	Pan X	Sci Rep	2017	1	0.1	-1
29503979	Whole exome analyses to examine the impact of rare variants on left ventricular traits in African American participants from the HyperGEN and GENOA studies	Do AN	J Hypertens Manag	2017	0	0	-1
28706904	Malignant peritoneal mesothelioma: a review	Kim J	Ann Transl Med	2017	62	8.9	0	Method or review paper
28400526	Plasmodium falciparum K13 Mutations Differentially Impact Ozonide Susceptibility and Parasite Fitness In Vitro	Straimer J	mBio	2017	60	8.6	0	Not coding variant associations
27240532	High-resolution copy number variation analysis of schizophrenia in Japan	Kushima I	Mol Psychiatry	2017	60	8.6	0	Copy number variants
28401900	An efficient and flexible test for rare variant effects	Sugasawa S	Eur J Hum Genet	2017	1	0.1	-1
28593890	Extremely Locally Advanced Ovarian Malignant Mixed Mullerian Tumor in 37-Years-Old Female	Jota G	Pril (Makedon Akad Nauk Umet Odd Med Nauki)	2017	1	0.1	-1
28585566	Analysis of LINE-1 Elements in DNA from Postmortem Brains of Individuals with Schizophrenia	Doyle GA	Neuropsychopharmacology	2017	36	5.1	2	Not coding variant associations
28750581	Rare Genome-Wide Copy Number Variation and Expression of Schizophrenia in 22q11.2 Deletion Syndrome	Bassett AS	Am J Psychiatry	2017	36	5.1	0	Copy number variants
28963451	CNV-association meta-analysis in 191,161 European adults reveals new loci associated with anthropometric traits	Macé A	Nat Commun	2017	39	5.6	0	Copy number variants
28194131	Needs and Requirements of Modern Biobanks on the Example of Dystonia Syndromes	Lohmann E	Front Neurol	2017	1	0.1	-1
27917525	A comparison study of multivariate fixed models and Gene Association with Multiple Traits (GAMuT) for next-generation sequencing	Chiu CY	Genet Epidemiol	2017	2	0.3	-1
29487696	The evolutionary pattern of mutations in glioblastoma reveals therapy-mediated selection	Muscat AM	Oncotarget	2017	20	2.9	0	Not coding variant associations
27861764	Autosomal recessive variations of TBX6, from congenital scoliosis to spondylocostal dysostosis	Lefebvre M	Clin Genet	2017	20	2.9	3	Can't access
37020259	Rare predicted loss-of-function variants of type I IFN immunity genes are associated with life-threatening COVID-19	Matuozzo D	Genome Med	2023	21	21	1
28346466	Common and rare exonic MUC5B variants associated with type 2 diabetes in Han Chinese	Chen G	PLoS One	2017	6	0.9	-1
35764656	The impact of rare germline variants on human somatic mutation processes	Vali-Pour M	Nat Commun	2022	5	2.5	1
28282485	Contribution of Mutations in Known Mendelian Glaucoma Genes to Advanced Early-Onset Primary Open-Angle Glaucoma	Zhou T	Invest Ophthalmol Vis Sci	2017	7	1	-1
28199472	Resequencing Study Identifies Rare Renin-Angiotensin-Aldosterone System Variants Associated With Blood Pressure Salt-Sensitivity: The GenSalt Study	Kelly TN	Am J Hypertens	2017	7	1	-1
28404951	Search for rare protein altering variants influencing susceptibility to multiple myeloma	Scales M	Oncotarget	2017	7	1	-1
29110857	Inter-relationship between PD-L1 expression and clinic-pathological features and driver gene mutations in pulmonary sarcomatoid carcinomas	Lococo F	Lung Cancer	2017	20	2.9	0	Not coding variant associations
28763065	Genome-wide association analysis identifies common variants influencing infant brain volumes	Xia K	Transl Psychiatry	2017	21	3	0	Not coding variant associations
29513197	An improved burden-test pipeline for identifying associations from rare germline and somatic variants	Geng Y	BMC Genomics	2017	6	0.9	-1
28304131	Copy number variation in 19 Italian multiplex families with autism spectrum disorder: Importance of synaptic and neurite elongation genes	Lintas C	Am J Med Genet B Neuropsychiatr Genet	2017	6	0.9	-1
27677958	Rare variant association test in family-based sequencing studies	Wang X	Brief Bioinform	2017	6	0.9	-1
29126409	Genomic determinants of long-term cardiometabolic complications in childhood acute lymphoblastic leukemia survivors	England J	BMC Cancer	2017	6	0.9	-1
27766458	Evaluating Mendelian nephrotic syndrome genes for evidence for risk alleles or oligogenicity that explain heritability	Crawford BD	Pediatr Nephrol	2017	6	0.9	-1
29102090	Comprehensive genomic profiling reveals inactivating SMARCA4 mutations and low tumor mutational burden in small cell carcinoma of the ovary, hypercalcemic-type	Lin DI	Gynecol Oncol	2017	22	3.1	3	Can't access
28887369	Genetic mechanisms of human hypertension and their implications for blood pressure physiology	Seidel E	Physiol Genomics	2017	22	3.1	2	Method or review paper
28387300	PD-L1 expression in lung adenosquamous carcinomas compared with the more common variants of non-small cell lung cancer	Shi X	Sci Rep	2017	23	3.3	0	Not coding variant associations
28669402	SEQSpark: A Complete Analysis Tool for Large-Scale Rare Variant Association Studies Using Whole-Genome and Exome Sequence Data	Zhang D	Am J Hum Genet	2017	7	1	-1
28547571	Clinical presentations and molecular studies of invasive renal epithelioid angiomyolipoma	Chuang CK	Int Urol Nephrol	2017	8	1.1	-1
28537275	A rare-variant test for high-dimensional data	Kaakinen M	Eur J Hum Genet	2017	8	1.1	-1
27859628	Longitudinal SNP-set association analysis of quantitative phenotypes	Wang Z	Genet Epidemiol	2017	8	1.1	-1
28846695	Novel and ultra-rare damaging variants in neuropeptide signaling are associated with disordered eating behaviors	Lutter M	PLoS One	2017	17	2.4	-1
34875679	Identification of Rare Loss-of-Function Genetic Variation Regulating Body Fat Distribution	Koprulu M	J Clin Endocrinol Metab	2022	5	2.5	1
27431295	Exome-sequencing in a large population-based study reveals a rare Asn396Ser variant in the LIPG gene associated with depressive symptoms	Amin N	Mol Psychiatry	2017	18	2.6	2	Not gene-level associations
34216101	Analysis of rare coding variants in 200,000 exome-sequenced subjects reveals novel genetic risk factors for type 2 diabetes	Curtis D	Diabetes Metab Res Rev	2022	5	2.5	1
28954785	The Driver Mutational Landscape of Ovarian Squamous Cell Carcinomas Arising in Mature Cystic Teratoma	Cooke SL	Clin Cancer Res	2017	21	3	2	Not gene-level associations
28539126	Knowledge-driven binning approach for rare variant association analysis: application to neuroimaging biomarkers in Alzheimer's disease	Kim D	BMC Med Inform Decis Mak	2017	11	1.6	-1
28398664	Rare copy number variants in patients with congenital conotruncal heart defects	Xie HM	Birth Defects Res	2017	11	1.6	-1
28965616	Spectrum of mutations in Italian patients with familial hypercholesterolemia: New results from the LIPIGEN study	Pirillo A	Atheroscler Suppl	2017	32	4.6	2	Not gene-level associations
28601532	Genetics of Atrial Fibrillation: State of the Art in 2017	Fatkin D	Heart Lung Circ	2017	32	4.6	0	Method or review paper
28703137	Platelet function is modified by common sequence variation in megakaryocyte super enhancers	Petersen R	Nat Commun	2017	34	4.9	0	Not coding variant associations
27896429	Copy number variability in Parkinson's disease: assembling the puzzle through a systems biology approach	La Cognata V	Hum Genet	2017	33	4.7	0	Copy number variants
28497381	Deep Benign Fibrous Histiocytoma of the Anterior Mediastinum Mimicking Malignancy	Puopolo A	Lung	2017	2	0.3	-1
28532585	Genetics of sudden cardiac death - An epidemiologic perspective	Kääb S	Int J Cardiol	2017	2	0.3	-1
28334355	A Zoom-Focus algorithm (ZFA) to locate the optimal testing region for rare variant association tests	Wang MH	Bioinformatics	2017	2	0.3	-1
28422189	Exome Analysis of Rare and Common Variants within the NOD Signaling Pathway	Andreoletti G	Sci Rep	2017	10	1.4	-1
29059180	Diverse type 2 diabetes genetic risk factors functionally converge in a phenotype-focused gene network	Sandor C	PLoS Comput Biol	2017	10	1.4	-1
29228253	Rare, Potentially Pathogenic Variants in ZNF469 Are Not Enriched in Keratoconus in a Large Australian Cohort of European Descent	Lucas SEM	Invest Ophthalmol Vis Sci	2017	9	1.3	-1
26887379	Exome-Wide Association Study Identified New Risk Loci for Hirschsprung's Disease	Tang W	Mol Neurobiol	2017	9	1.3	-1
28230171	Impact of Genetic Variation on Human CaMKK2 Regulation by Ca(2+)-Calmodulin and Multisite Phosphorylation	O'Brien MT	Sci Rep	2017	9	1.3	-1
28844485	Unified Sequence-Based Association Tests Allowing for Multiple Functional Annotations and Meta-analysis of Noncoding Variation in Metabochip Data	He Z	Am J Hum Genet	2017	28	4	0	Method or review paper
29066733	Adaptive combination of Bayes factors as a powerful method for the joint analysis of rare and common variants	Lin WY	Sci Rep	2017	3	0.4	-1
28438616	Pericytic tumors of the kidney-a clinicopathologic analysis of 17 cases	Sirohi D	Hum Pathol	2017	5	0.7	-1
28178086	Identification of rare nonsynonymous variants in SYNE1/CPG2 in bipolar affective disorder	Sharp SI	Psychiatr Genet	2017	5	0.7	-1
29213072	Characterization of Large Copy Number Variation in Mexican Type 2 Diabetes subjects	de Jesús Ascencio-Montiel I	Sci Rep	2017	5	0.7	-1
28642336	The evolving genetic risk for sporadic ALS	Gibson SB	Neurology	2017	24	3.4	0	Method or review paper
35529798	Identification of heritable rare variants associated with early-stage lung adenocarcinoma risk	Fu R	Transl Lung Cancer Res	2022	5	2.5	1
28290481	Identification of Elongated Primary Cilia with Impaired Mechanotransduction in Idiopathic Scoliosis Patients	Oliazadeh N	Sci Rep	2017	26	3.7	0	Not coding variant associations
28002544	The Genetic Architecture of Major Depressive Disorder in Han Chinese Women	Peterson RE	JAMA Psychiatry	2017	24	3.4	2	Not gene-level associations
27474101	A unified powerful set-based test for sequencing data analysis of GxE interactions	Su YR	Biostatistics	2017	24	3.4	0	Method or review paper
28864915	A gene-based test of association through an orthogonal decomposition of genotype scores	Chen Z	Hum Genet	2017	5	0.7	-1
28672760	Genetic association test based on principal component analysis	Chen Z	Stat Appl Genet Mol Biol	2017	5	0.7	-1
28430711	Evaluation of KDR rs34231037 as a predictor of sunitinib efficacy in patients with metastatic renal cell carcinoma	Apellániz-Ruiz M	Pharmacogenet Genomics	2017	5	0.7	-1
29138264	Comprehensive investigation of cytokine- and immune-related gene variants in HBV-associated hepatocellular carcinoma patients	Yu F	Biosci Rep	2017	5	0.7	-1
28346479	Rare variants in fox-1 homolog A (RBFOX1) are associated with lower blood pressure	He KY	PLoS Genet	2017	15	2.1	-1
28434888	Melorheostosis: Exome sequencing of an associated dermatosis implicates postzygotic mosaicism of mutated KRAS	Whyte MP	Bone	2017	15	2.1	-1
28931914	High resolution analysis of rare copy number variants in patients with autism spectrum disorder from Taiwan	Chen CH	Sci Rep	2017	16	2.3	-1
28302160	Increased genomic burden of germline copy number variants is associated with early onset breast cancer: Australian breast cancer family registry	Walker LC	Breast Cancer Res	2017	8	1.1	-1
28827537	Genomic Characteristics of Gender Dysphoria Patients and Identification of Rare Mutations in RYR3 Gene	Yang F	Sci Rep	2017	9	1.3	-1
28019059	Impact of genotyping errors on statistical power of association tests in genomic analyses: A case study	Hou L	Genet Epidemiol	2017	3	0.4	-1
28668085	Utility of somatosensory evoked potentials in the assessment of response to IVIG in a long-lasting case of chronic immune sensory polyradiculopathy	Clerici AM	BMC Neurol	2017	3	0.4	-1
34279065	Contribution of Rare Genetic Variation to Disease Susceptibility in a Large Scandinavian Myositis Cohort	Bianchi M	Arthritis Rheumatol	2022	5	2.5	1
28677271	Telomerase reverse transcriptase germline mutations and hepatocellular carcinoma in patients with nonalcoholic fatty liver disease	Donati B	Cancer Med	2017	26	3.7	0	Not coding variant associations
35441217	Frequency of pathogenic germline variants in cancer susceptibility genes in 1336 renal cell carcinoma cases	Yngvadottir B	Hum Mol Genet	2022	6	3	1
28825596	Ultrasensitive mutation detection identifies rare residual cells causing acute myelogenous leukemia relapse	Parkin B	J Clin Invest	2017	27	3.9	2	Not coding variant associations
27926510	Genetic and epigenetic characterization of the BRCA1 gene in Brazilian women at-risk for hereditary breast cancer	Felicio PS	Oncotarget	2017	4	0.6	-1
28580640	Region-based association tests for sequencing data on survival traits	Chien LC	Genet Epidemiol	2017	4	0.6	-1
30584593	No rare deleterious variants from STK32B, PPARGC1A, and CTNNA3 are associated with essential tremor	Houle G	Neurol Genet	2017	4	0.6	-1
34152079	Association of mitochondrial variants and haplogroups identified by whole exome sequencing with Alzheimer's disease	Zhang X	Alzheimers Dement	2022	6	3	1
28468790	Genome-Wide Association Studies and Meta-Analyses for Congenital Heart Defects	Agopian AJ	Circ Cardiovasc Genet	2017	29	4.1	0	Not coding variant associations
28374549	Columnar cell variant of papillary thyroid carcinoma: Cytomorphological characteristics of 11 cases with histological correlation and literature review	Bongiovanni M	Cancer Cytopathol	2017	9	1.3	-1
28438615	Clinicopathological, immunohistochemical, and mutational analyses of pulmonary enteric adenocarcinoma: usefulness of SATB2 and β-catenin immunostaining for differentiation from metastatic colorectal carcinoma	Matsushima J	Hum Pathol	2017	10	1.4	-1
28346524	Rare mutations and potentially damaging missense variants in genes encoding fibrillar collagens and proteins involved in their production are candidates for risk for preterm premature rupture of membranes	Modi BP	PLoS One	2017	10	1.4	-1
28589856	Association analysis of rare variants near the APOE region with CSF and neuroimaging biomarkers of Alzheimer's disease	Nho K	BMC Med Genomics	2017	15	2.1	-1
29376044	The Genetic Basis of Type 2 Diabetes in Hispanics and Latin Americans: Challenges and Opportunities	Mercader JM	Front Public Health	2017	14	2	-1
28210881	Comprehensive genomic profiling of malignant phyllodes tumors of the breast	Nozad S	Breast Cancer Res Treat	2017	15	2.1	-1
28153381	RIC3 variants are not associated with Parkinson's disease in French-Canadians and French	Ross JP	Neurobiol Aging	2017	4	0.6	-1
29367538	Breast Cancer Clinical Trial of Chemotherapy and Trastuzumab: Potential Tool to Identify Cardiac Modifying Variants of Dilated Cardiomyopathy	Serie DJ	J Cardiovasc Dev Dis	2017	4	0.6	-1
27995669	PERCH: A Unified Framework for Disease Gene Prioritization	Feng BJ	Hum Mutat	2017	67	9.6	0	Method or review paper
28444290	Low-density lipoproteins cause atherosclerotic cardiovascular disease. 1. Evidence from genetic, epidemiologic, and clinical studies. A consensus statement from the European Atherosclerosis Society Consensus Panel	Ference BA	Eur Heart J	2017	947	135.3	0	Method or review paper
36103205	Burden of Rare Genetic Variants in Spontaneous Coronary Artery Dissection With High-risk Features	Wang Y	JAMA Cardiol	2022	6	3	1
28650482	The contribution of rare variants to risk of schizophrenia in individuals with and without intellectual disability	Singh T	Nat Genet	2017	110	15.7	2	Not gene-level associations
28228157	Genetics and genomics of dilated cardiomyopathy and systolic heart failure	Tayal U	Genome Med	2017	64	9.1	0	Method or review paper
28166811	Pathogenic variant burden in the ExAC database: an empirical approach to evaluating population data for clinical variant interpretation	Kobayashi Y	Genome Med	2017	76	10.9	0	Method or review paper
35545612	A rare variant analysis framework using public genotype summary counts to prioritize disease-predisposition genes	Chen W	Nat Commun	2022	6	3	1
27939555	Exome array analysis suggests an increased variant burden in families with schizophrenia	McCarthy NS	Schizophr Res	2017	11	1.6	-1
27818000	Lack of evidence for a role of genetic variation in TMEM230 in the risk for Parkinson's disease in the Caucasian population	Giri A	Neurobiol Aging	2017	13	1.9	-1
29093530	Sporadic Hirschsprung Disease: Mutational Spectrum and Novel Candidate Genes Revealed by Next-generation Sequencing	Zhang Z	Sci Rep	2017	13	1.9	-1
27350171	Impact of rare variants in ARHGAP29 to the etiology of oral clefts: role of loss-of-function vs missense variants	Savastano CP	Clin Genet	2017	14	2	-1
28039885	Rare variant association test with multiple phenotypes	Lee S	Genet Epidemiol	2017	14	2	-1
28228103	Disease manifestations and burden of illness in patients with acid sphingomyelinase deficiency (ASMD)	McGovern MM	Orphanet J Rare Dis	2017	50	7.1	0	Method or review paper
35173266	Rare variants in IFFO1, DTNB, NLRC3 and SLC22A10 associate with Alzheimer's disease CSF profile of neuronal injury and inflammation	Neumann A	Mol Psychiatry	2022	7	3.5	1
28825717	A human APOC3 missense variant and monoclonal antibody accelerate apoC-III clearance and lower triglyceride-rich lipoprotein levels	Khetarpal SA	Nat Med	2017	52	7.4	0	Not gene-level associations
28959274	Illustrating, Quantifying, and Correcting for Bias in Post-hoc Analysis of Gene-Based Rare Variant Tests of Association	Grinde KE	Front Genet	2017	1	0.1	-1
28641109	Rare Copy Number Variants in NRXN1 and CNTN6 Increase Risk for Tourette Syndrome	Huang AY	Neuron	2017	78	11.1	2	Copy number variants
28968992	Target sequencing of 307 deafness genes identifies candidate genes implicated in microtia	Wang P	Oncotarget	2017	2	0.3	-1
29087128	Giant juvenile fibroadenoma of the breast: a clinical case	Celik SU	Arch Argent Pediatr	2017	2	0.3	-1
28393092	Hormonal based treatment of ovarian anaplastic ependymoma with anastrozole	Gorski JW	Gynecol Oncol Rep	2017	2	0.3	-1
28814775	Mutational profile of rare variants in inflammasome-related genes in Behçet disease: A Next Generation Sequencing approach	Burillo-Sanz S	Sci Rep	2017	14	2	-1
29187259	Impact of IQ on the diagnostic yield of chromosomal microarray in a community sample of adults with schizophrenia	Lowther C	Genome Med	2017	14	2	-1
29177109	Exome Sequencing of Extended Families with Alzheimer's Disease Identifies Novel Genes Implicated in Cell Immunity and Neuronal Function	Cukier HN	J Alzheimers Dis Parkinsonism	2017	10	1.4	-1
29340042	Identification of potential genetic causal variants for rheumatoid arthritis by whole-exome sequencing	Li Y	Oncotarget	2017	11	1.6	-1
28640830	Optimal sequencing strategies for identifying disease-associated singletons	Rashkin S	PLoS Genet	2017	11	1.6	-1
29190701	A non-threshold region-specific method for detecting rare variants in complex diseases	Hsieh AR	PLoS One	2017	1	0.1	-1
35110524	Rare SLC13A1 variants associate with intervertebral disc disorder highlighting role of sulfate in disc pathology	Bjornsdottir G	Nat Commun	2022	7	3.5	1
28106563	Comprehensive Screening for Disease Risk Variants in Early-Onset Alzheimer's Disease Genes in African Americans Identifies Novel PSEN Variants	N'Songo A	J Alzheimers Dis	2017	4	0.6	-1
35365804	Exome-wide screening identifies novel rare risk variants for major depression disorder	Cheng S	Mol Psychiatry	2022	7	3.5	1
36063648	Rare genetic variant burden in DPYD predicts severe fluoropyrimidine-related toxicity risk	De Mattia E	Biomed Pharmacother	2022	7	3.5	1
28714182	Rare coding variants in MAPK7 predispose to adolescent idiopathic scoliosis	Gao W	Hum Mutat	2017	22	3.1	3	Can't access
28195573	Whole-exome sequencing of individuals from an isolated population implicates rare risk variants in bipolar disorder	Lescai F	Transl Psychiatry	2017	14	2	-1
28480329	African American exome sequencing identifies potential risk variants at Alzheimer disease loci	N'Songo A	Neurol Genet	2017	15	2.1	-1
28706299	Findings of a 1303 Korean whole-exome sequencing study	Kwak SH	Exp Mol Med	2017	20	2.9	2	Not gene-level associations
28871186	Analysis of population-specific pharmacogenomic variants using next-generation sequencing data	Ahn E	Sci Rep	2017	13	1.9	-1
29149916	Whole-exome sequencing in amyotrophic lateral sclerosis suggests NEK1 is a risk gene in Chinese	Gratten J	Genome Med	2017	13	1.9	-1
28867149	Establishing the role of rare coding variants in known Parkinson's disease risk loci	Jansen IE	Neurobiol Aging	2017	6	0.9	-1
28347661	Functional characterization of a common CYP4F11 genetic variant and identification of functionally defective CYP4F11 variants in erythromycin metabolism and 20-HETE synthesis	Yi M	Arch Biochem Biophys	2017	6	0.9	-1
28191685	Gene-based segregation method for identifying rare variants in family-based sequencing studies	Qiao D	Genet Epidemiol	2017	10	1.4	-1
28397860	Whole-Exome Sequencing of Congenital Glaucoma Patients Reveals Hypermorphic Variants in GPATCH3, a New Gene Involved in Ocular and Craniofacial Development	Ferre-Fern√°ndez JJ	Sci Rep	2017	10	1.4	-1
28852706	Ultra-rare mutations in SRCAP segregate in Caribbean Hispanic families with Alzheimer disease	Vardarajan BN	Neurol Genet	2017	4	0.6	-1
29016666	Novel genes and mutations in patients affected by recurrent pregnancy loss	Quintero-Ronderos P	PLoS One	2017	27	3.9	2	Not gene-level associations
28577227	[Search for risk genes in Alzheimer's disease]	Karaca I	Nervenarzt	2017	1	0.1	-1
28777004	Whole-Exome Sequencing Identifies the 6q12-q16 Linkage Region and a Candidate Gene, TTK, for Pulmonary Nontuberculous Mycobacterial Disease	Chen F	Am J Respir Crit Care Med	2017	7	1	-1
28505269	New mutations in non-syndromic primary ovarian insufficiency patients identified via whole-exome sequencing	Pati√±o LC	Hum Reprod	2017	31	4.4	2	Not coding variant associations
34718612	Causal and Candidate Gene Variants in a Large Cohort of Women With Primary Ovarian Insufficiency	Gorsi B	J Clin Endocrinol Metab	2022	7	3.5	1
35568032	Whole-exome sequencing identifies rare genetic variants associated with human plasma metabolites	Bomba L	Am J Hum Genet	2022	7	3.5	1
29976289	Remnant-Like Particle Cholesterol, Low-Density Lipoprotein Triglycerides, and Incident Cardiovascular Disease	Saeed A	J Am Coll Cardiol	2018	63	10.5	0	Method or review paper
29983323	De Novo Mutation in Genes Regulating Neural Stem Cell Fate in Human Congenital Hydrocephalus	Furey CG	Neuron	2018	61	10.2	2	De novo variants
29191496	A higher rare CNV burden in the genetic background potentially contributes to intellectual disability phenotypes in 22q11.2 deletion syndrome	Jensen M	Eur J Med Genet	2018	13	2.2	-1
29428909	Comparison of common burden tests for genetic association studies of rare variants	Lin XQ	Yi Chuan	2018	0	0	-1
29682026	Prognostic Implications of Histological Clear Cells in High-Grade Intracranial Ependymal Tumors: A Retrospective Analysis from a Tertiary Care Hospital in Pakistan	Hashmi FA	Asian J Neurosurg	2018	0	0	-1
29783802	[Clinicopathologic and molecular features of cribriform morular variant of papillary thyroid carcinoma]	Cui XJ	Zhonghua Bing Li Xue Za Zhi	2018	0	0	-1
29772195	Common Grounds for Family Maladies	Oexle K	Neuron	2018	0	0	-1
29876895	Novel Methods for Family-Based Genetic Studies	Yan Q	Methods Mol Biol	2018	0	0	-1
30148849	Rare gene deletions in genetic generalized and Rolandic epilepsies	Jabbari K	PLoS One	2018	1	0.2	-1
29368655	Deleterious genetic variants in ciliopathy genes increase risk of ritodrine-induced cardiac and pulmonary side effects	Seo H	BMC Med Genomics	2018	12	2	-1
29576439	LRRK2 protective haplotype and full sequencing study in REM sleep behavior disorder	Ouled Amar Bencheikh B	Parkinsonism Relat Disord	2018	12	2	-1
29555433	Rare nonsynonymous variants in SORT1 are associated with increased risk for frontotemporal dementia	Philtjens S	Neurobiol Aging	2018	13	2.2	-1
29997225	Rho Guanine Nucleotide Exchange Factor ARHGEF17 Is a Risk Gene for Intracranial Aneurysms	Yang X	Circ Genom Precis Med	2018	13	2.2	-1
29370225	Examining the role of common and rare mitochondrial variants in schizophrenia	Gonçalves VF	PLoS One	2018	13	2.2	-1
35133174	CELSR1 Risk Alleles in Familial Bicuspid Aortic Valve and Hypoplastic Left Heart Syndrome	Theis JL	Circ Genom Precis Med	2022	8	4	1
29773157	Genetic Etiology for Alcohol-Induced Cardiac Toxicity	Ware JS	J Am Coll Cardiol	2018	83	13.8	0	Method or review paper
29539638	Dysregulation of expression correlates with rare-allele burden and fitness loss in maize	Kremling KAG	Nature	2018	88	14.7	0	Not coding variant associations
30208929	PLD3 epigenetic changes in the hippocampus of Alzheimer's disease	Blanco-Luquin I	Clin Epigenetics	2018	12	2	-1
30324308	Mixed TDP-43 proteinopathy and tauopathy in frontotemporal lobar degeneration: nine case series	Kim EJ	J Neurol	2018	12	2	-1
29966037	Genetic profile of isolated congenital diaphragmatic hernia revealed by targeted next-generation sequencing	Kammoun M	Prenat Diagn	2018	12	2	-1
34711450	Association of Inherited Mutations in DNA Repair Genes with Localized Prostate Cancer	Lee DJ	Eur Urol	2022	8	4	1
29625023	Identification of Misclassified ClinVar Variants via Disease Population Prevalence	Shah N	Am J Hum Genet	2018	54	9	0	Not coding variant associations
29210346	Serious Neurological Adverse Events after Ivermectin-Do They Occur beyond the Indication of Onchocerciasis?	Chandler RE	Am J Trop Med Hyg	2018	55	9.2	0	Not coding variant associations
28322274	A rare missense variant in RCL1 segregates with depression in extended families	Amin N	Mol Psychiatry	2018	12	2	-1
30014597	CHCHD10 variants in amyotrophic lateral sclerosis: Where is the evidence?	Project MinE ALS Sequencing Consortium	Ann Neurol	2018	12	2	-1
29332010	Oligogenic genetic variation of neurodegenerative disease genes in 980 postmortem human brains	Keogh MJ	J Neurol Neurosurg Psychiatry	2018	11	1.8	-1
29749045	Evidence for GALNT12 as a moderate penetrance gene for colorectal cancer	Evans DR	Hum Mutat	2018	13	2.2	-1
30385609	Differential Burden of Rare and Common Variants on Tumor Characteristics, Survival, and Mode of Detection in Breast Cancer	Li J	Cancer Res	2018	14	2.3	-1
29317680	Exome-wide rare variant analyses of two bone mineral density phenotypes: the challenges of analyzing rare genetic variation	Sun J	Sci Rep	2018	0	0	-1
29411327	Gene variants of the phosphatidylcholine synthesis pathway do not contribute to RDS in the Chinese population	Chen YJ	World J Pediatr	2018	0	0	-1
35661827	Population-scale analysis of common and rare genetic variation associated with hearing loss in adults	Praveen K	Commun Biol	2022	10	5	1
29141989	Analysis of Copy Number Variants on Chromosome 21 in Down Syndrome-Associated Congenital Heart Defects	Rambo-Martin BL	G3 (Bethesda)	2018	11	1.8	-1
29692703	Pleiotropic Effects of Variants in Dementia Genes in Parkinson Disease	Ibanez L	Front Neurosci	2018	11	1.8	-1
29700473	An analytical framework for whole-genome sequence association studies and its implications for autism spectrum disorder	Werling DM	Nat Genet	2018	133	22.2	0	Method or review paper
35262230	Role of Lysosomal Gene Variants in Modulating GBA-Associated Parkinson's Disease Risk	Straniero L	Mov Disord	2022	10	5	1
30258228	Common genetic variants contribute to risk of rare severe neurodevelopmental disorders	Niemi MEK	Nature	2018	139	23.2	2	Not coding variant associations
35108381	Evaluation of Evidence for Pathogenicity Demonstrates That BLK, KLF11, and PAX4 Should Not Be Included in Diagnostic Testing for MODY	Laver TW	Diabetes	2022	12	6	1
29148534	Genetic testing of complement and coagulation pathways in patients with severe hypertension and renal microangiopathy	Larsen CP	Mod Pathol	2018	15	2.5	0	Not coding variant associations
29587865	Distinctive features of immunostaining and mutational load in primary pulmonary enteric adenocarcinoma: implications for differential diagnosis and immunotherapy	Chen M	J Transl Med	2018	15	2.5	0	Not coding variant associations
29433971	Large-scale Sequencing of Testicular Germ Cell Tumour (TGCT) Cases Excludes Major TGCT Predisposition Gene	Litchfield K	Eur Urol	2018	28	4.7	3	Can't access
29227308	Medical bioinformatics in melanoma	Cheng PF	Curr Opin Oncol	2018	9	1.5	-1
29427188	Molecular characteristic of acute leukemias with t(16;21)/FUS-ERG	Zerkalenkova E	Ann Hematol	2018	9	1.5	-1
30586385	Comprehensive cross-disorder analyses of CNTNAP2 suggest it is unlikely to be a primary risk gene for psychiatric disorders	Toma C	PLoS Genet	2018	14	2.3	-1
29168297	Single suture craniosynostosis: Identification of rare variants in genes associated with syndromic forms	Clarke CM	Am J Med Genet A	2018	14	2.3	-1
29931698	A subregion-based burden test for simultaneous identification of susceptibility loci and subregions within	Zhu B	Genet Epidemiol	2018	4	0.7	-1
29986644	Stepwise approach to SNP-set analysis illustrated with the Metabochip and colorectal cancer in Japanese Americans of the Multiethnic Cohort	Cologne J	BMC Genomics	2018	4	0.7	-1
29731251	Common Variant Burden Contributes to the Familial Aggregation of Migraine in 1,589 Families	Gormley P	Neuron	2018	27	4.5	2	Not coding variant associations
29726959	Melanocortin 4 Receptor Pathway Dysfunction in Obesity: Patient Stratification Aimed at MC4R Agonist Treatment	Ayers KL	J Clin Endocrinol Metab	2018	27	4.5	0	Not coding variant associations
29280188	On the substructure controls in rare variant analysis: Principal components or variance components?	Luo Y	Genet Epidemiol	2018	4	0.7	-1
29687944	Association of copy number variation across the genome with neuropsychiatric traits in the general population	Guyatt AL	Am J Med Genet B Neuropsychiatr Genet	2018	16	2.7	0	Copy number variants
30518751	Identification of potential genetic risk factors for bipolar disorder by whole-exome sequencing	Husson T	Transl Psychiatry	2018	8	1.3	-1
30021613	Single-word comprehension deficits in the nonfluent variant of primary progressive aphasia	Schaeverbeke J	Alzheimers Res Ther	2018	8	1.3	-1
30268395	Exome-Wide Rare Variant Analyses in Sudden Infant Death Syndrome	Tester DJ	J Pediatr	2018	9	1.5	-1
29801487	Burden of de novo mutations and inherited rare single nucleotide variants in children with sensory processing dysfunction	Marco EJ	BMC Med Genomics	2018	9	1.5	-1
29495593	Advances in the Genetics of Hypertension: The Effect of Rare Variants	Russo A	Int J Mol Sci	2018	24	4	0	Method or review paper
30450471	Parental Whole-Exome Sequencing Enables Sialidosis Type II Diagnosis due to an NEU1 Missense Mutation as an Underlying Cause of Nephrotic Syndrome in the Child	Maroofian R	Kidney Int Rep	2018	5	0.8	-1
36097220	Genetic risk factors have a substantial impact on healthy life years	Jukarainen S	Nat Med	2022	12	6	1
34544842	Role of genetics in amyotrophic lateral sclerosis: a large cohort study in Chinese mainland population	Chen YP	J Med Genet	2022	13	6.5	1
34889978	Common, low-frequency, rare, and ultra-rare coding variants contribute to COVID-19 severity	Fallerini C	Hum Genet	2022	13	6.5	1
29404424	Signatures of Selection at Drug Resistance Loci in Mycobacterium tuberculosis	Mortimer TD	mSystems	2018	24	4	0	Not coding variant associations
29582521	Identified OAS3 gene variants associated with coexistence of HBsAg and anti-HBs in chronic HBV infection	Wang S	J Viral Hepat	2018	5	0.8	-1
29181843	Genetic factors influencing prostate cancer risk in Norwegian men	Chen H	Prostate	2018	5	0.8	-1
36327219	Exome-wide association study to identify rare variants influencing COVID-19 outcomes: Results from the Host Genetics Initiative	Butler-Laporte G	PLoS Genet	2022	14	7	1
35417304	Rare and Common Variants in KIF15 Contribute to Genetic Risk of Idiopathic Pulmonary Fibrosis	Zhang D	Am J Respir Crit Care Med	2022	18	9	1
35939579	Germline Mutations in CIDEB and Protection against Liver Disease	Verweij N	N Engl J Med	2022	19	9.5	1
35405176	Rare ATG7 genetic variants predispose patients to severe fatty liver disease	Baselli GA	J Hepatol	2022	20	10	1
30033060	Rare coding variants in genes encoding GABA(A) receptors in genetic generalised epilepsies: an exome-based case-control study	May P	Lancet Neurol	2018	31	5.2	2	Not gene-level associations
28019640	Semantic Dementia: A Mini-Review	Klimova B	Mini Rev Med Chem	2018	3	0.5	-1
30854262	Genetics of Subclinical Coronary Atherosclerosis	Bielak LF	Curr Genet Med Rep	2018	3	0.5	-1
28847364	Spermatogenic phenotype of testis-specific protein, Y-encoded, 1 (TSPY1) dosage deficiency is independent of variations in TSPY-like 1 (TSPYL1) and TSPY-like 5 (TSPYL5): a case-control study in a Han Chinese population	Yang X	Reprod Fertil Dev	2018	10	1.7	-1
29910053	Genetic burden and associations with adverse neurodevelopment in neonates with congenital heart disease	Blue GM	Am Heart J	2018	10	1.7	-1
29148569	Exome sequence analysis and follow up genotyping implicates rare ULK1 variants to be involved in susceptibility to schizophrenia	Al Eissa MM	Ann Hum Genet	2018	10	1.7	-1
29792231	High burden of birthweight-lowering genetic variants in Africans and Asians	Tekola-Ayele F	BMC Med	2018	10	1.7	-1
30093141	Mutation screening of NEK1 in Chinese ALS patients	Shu S	Neurobiol Aging	2018	10	1.7	-1
29876891	Assessing Rare Variation in Complex Traits	Kuchenbaecker K	Methods Mol Biol	2018	2	0.3	-1
30214655	ADAPTIVE-WEIGHT BURDEN TEST FOR ASSOCIATIONS BETWEEN QUANTITATIVE TRAITS AND GENOTYPE DATA WITH COMPLEX CORRELATIONS	Wu X	Ann Appl Stat	2018	2	0.3	-1
30157880	A small population, randomised, placebo-controlled trial to determine the efficacy of anakinra in the treatment of pustular psoriasis: study protocol for the APRICOT trial	Cornelius V	Trials	2018	10	1.7	-1
29896098	Associations of MAP2K3 Gene Variants With Superior Memory in SuperAgers	Huentelman MJ	Front Aging Neurosci	2018	11	1.8	-1
30135031	Effect of cytochrome CYP2C19 metabolizing activity on antidepressant response and side effects: Meta-analysis of data from genome-wide association studies	Fabbri C	Eur Neuropsychopharmacol	2018	34	5.7	0	Not coding variant associations
30217742	Identification of Genes Associated With Hirschsprung Disease, Based on Whole-Genome Sequence Analysis, and Potential Effects on Enteric Nervous System Development	Tang CS	Gastroenterology	2018	34	5.7	3	Can't access
30323751	Nivolumab-Induced Impressive Response of Refractory Pulmonary Sarcomatoid Carcinoma with Brain Metastasis	Salati M	Case Rep Oncol	2018	17	2.8	0	Not coding variant associations
29908077	Genome sequencing uncovers phenocopies in primary progressive multiple sclerosis	Jia X	Ann Neurol	2018	19	3.2	2	Not gene-level associations
29920840	Targeted resequencing reveals genetic risks in patients with sporadic idiopathic pulmonary fibrosis	Deng Y	Hum Mutat	2018	19	3.2	3	Can't access
29545352	Genome-Wide Association Studies of Metabolites in Patients with CKD Identify Multiple Loci and Illuminate Tubular Transport Mechanisms	Li Y	J Am Soc Nephrol	2018	22	3.7	0	Not coding variant associations
29180354	Patients with rare diseases: from therapeutic orphans to pioneers of personalized treatments	Klein C	EMBO Mol Med	2018	7	1.2	-1
29329714	Mutation burden profile in familial Alzheimer's disease cases from India	Syama A	Neurobiol Aging	2018	7	1.2	-1
29253101	A novel human pain insensitivity disorder caused by a point mutation in ZFHX2	Habib AM	Brain	2018	17	2.8	2	Not gene-level associations
29526452	Rare variant analysis in multiply affected families, association studies and functional analysis suggest a role for the ITGΒ4 gene in schizophrenia and bipolar disorder	O'Brien NL	Schizophr Res	2018	6	1	-1
30285649	Biochemical and molecular characterization of adult patients with type I Gaucher disease and carrier frequency analysis of Leu444Pro - a common Gaucher disease mutation in India	Sheth J	BMC Med Genet	2018	6	1	-1
36411364	Exome sequencing identifies rare damaging variants in ATP8B4 and ABCA1 as risk factors for Alzheimer's disease	Holstege H	Nat Genet	2022	29	14.5	1
28913729	Exome array analysis identifies ETFB as a novel susceptibility gene for anthracycline-induced cardiotoxicity in cancer patients	Ruiz-Pinto S	Breast Cancer Res Treat	2018	22	3.7	3	Can't access
29898714	Calculating the statistical significance of rare variants causal for Mendelian and complex disorders	Rao AR	BMC Med Genomics	2018	6	1	-1
29764441	Case Report: Identification of an HNF1B p.Arg527Gln mutation in a Maltese patient with atypical early onset diabetes and diabetic nephropathy	Pace NP	BMC Endocr Disord	2018	6	1	-1
30619482	Rare Copy Number Variations in a Chinese Cohort of Autism Spectrum Disorder	Fan Y	Front Genet	2018	6	1	-1
28895126	Construction of an Exome-Wide Risk Score for Schizophrenia Based on a Weighted Burden Test	Curtis D	Ann Hum Genet	2018	6	1	-1
30255815	Rare variants in the splicing regulatory elements of EXOC3L4 are associated with brain glucose metabolism in Alzheimer's disease	Miller JE	BMC Med Genomics	2018	7	1.2	-1
29720671	Genetic variation in 117 myelination-related genes in schizophrenia: Replication of association to lipid biosynthesis genes	Stokowy T	Sci Rep	2018	7	1.2	-1
36038634	Large-scale sequencing identifies multiple genes and rare variants associated with Crohn's disease susceptibility	Sazonovs A	Nat Genet	2022	34	17	1
35410376	Exome sequencing in bipolar disorder identifies AKAP11 as a risk gene shared with schizophrenia	Palmer DS	Nat Genet	2022	36	18	1
35047017	Contribution of Rare and Low-Frequency Variants to Multiple Sclerosis Susceptibility in the Italian Continental Population			2021	3	1.5	1	Additional curation
35401413	Deciphering Genetic Susceptibility to Tuberculous Meningitis			2022	3	1.5	1	Additional curation
30203143	Myofibrillar myopathy in the genomic context	Fichna JP	J Appl Genet	2018	19	3.2	0	Method or review paper
36778668	Systematic single-variant and gene-based association testing of thousands of phenotypes in 394,841 UK Biobank exomes			2022	51	25.5	1	Additional curation
30168256	Targeted sequencing to identify novel genetic risk factors for deep vein thrombosis: a study of 734 genes	de Haan HG	J Thromb Haemost	2018	7	1.2	-1
29879027	Primary ovarian small cell carcinoma of pulmonary type with coexisting endometrial carcinoma in a breast cancer patient receiving tamoxifen: A case report and literature review	Yin L	Medicine (Baltimore)	2018	7	1.2	-1
29218897	Codon bias among synonymous rare variants is associated with Alzheimer's disease imaging biomarker	Miller JE	Pac Symp Biocomput	2018	7	1.2	-1
29178441	Gene-based genetic association test with adaptive optimal weights	Chen Z	Genet Epidemiol	2018	6	1	-1
29378355	A Genome-wide Study of Common and Rare Genetic Variants Associated with Circulating Thrombin Activatable Fibrinolysis Inhibitor	Stanne TM	Thromb Haemost	2018	6	1	-1
29696701	Multimarker and rare variants genomewide association studies for bone weight in Simmental cattle	Miao J	J Anim Breed Genet	2018	6	1	-1
29224928	Association of Rare Predicted Loss-of-Function Variants in Cellular Pathways with Sub-Phenotypes in Age-Related Macular Degeneration	Pietraszkiewicz A	Ophthalmology	2018	7	1.2	-1
28586782	Are Cystic Pancreatic Neuroendocrine Tumors an Indolent Entity Results from a Single-Center Surgical Series	Paiella S	Neuroendocrinology	2018	6	1	-1
29932245	FastSKAT: Sequence kernel association tests for very large sets of markers	Lumley T	Genet Epidemiol	2018	18	3	0	Method or review paper
30112700	Early Treatment with Quinidine in 2 Patients with Epilepsy of Infancy with Migrating Focal Seizures (EIMFS) Due to Gain-of-Function KCNT1 Mutations: Functional Studies, Clinical Responses, and Critical Issues for Personalized Therapy	Dilena R	Neurotherapeutics	2018	21	3.5	0	Not coding variant associations
29693731	Genetic and Epigenetic Defects at the GNAS Locus Lead to Distinct Patterns of Skeletal Growth but Similar Early-Onset Obesity	Hanna P	J Bone Miner Res	2018	21	3.5	2	Not gene-level associations
29531218	An examination of multiple classes of rare variants in extended families with bipolar disorder	Toma C	Transl Psychiatry	2018	21	3.5	2	Not gene-level associations
29898972	Diffuse Lewy body disease manifesting as corticobasal syndrome: A rare form of Lewy body disease	Kasanuki K	Neurology	2018	21	3.5	0	Not coding variant associations
29732714	Brief Report: Whole-Exome Sequencing to Identify Rare Variants and Gene Networks That Increase Susceptibility to Scleroderma in African Americans	Gourh P	Arthritis Rheumatol	2018	6	1	-1
30002152	Exome Chip Analysis Identifies Low-Frequency and Rare Variants in MRPL38 for White Matter Hyperintensities on Brain Magnetic Resonance Imaging	Jian X	Stroke	2018	10	1.7	-1
30029695	The burden of congenital hyperinsulinism in the United Kingdom: a cost of illness study	Eljamel S	Orphanet J Rare Dis	2018	10	1.7	-1
29656768	A rare variant in MLKL confers susceptibility to ApoE ɛ4-negative Alzheimer's disease in Hong Kong Chinese population	Wang B	Neurobiol Aging	2018	10	1.7	-1
29134665	Mechanistic contributions of FBXO7 to Parkinson disease	Joseph S	J Neurochem	2018	11	1.8	-1
29486958	Whole genome sequencing of 91 multiplex schizophrenia families reveals increased burden of rare, exonic copy number variation in schizophrenia probands and genetic heterogeneity	Khan FF	Schizophr Res	2018	11	1.8	-1
29610366	Exome chip analyses identify genes affecting mortality after HLA-matched unrelated-donor blood and marrow transplantation	Zhu Q	Blood	2018	14	2.3	-1
29961567	Variants of Unknown Significance in Genes Associated with Heritable Thoracic Aortic Disease Can Be Low Penetrant "Risk Variants"	Kwartler CS	Am J Hum Genet	2018	14	2.3	-1
29449575	Actionable perturbations of damage responses by TCL1/ATM and epigenetic lesions form the basis of T-PLL	Schrader A	Nat Commun	2018	41	6.8	0	Not coding variant associations
29697368	Exact association test for small size sequencing data	Lee J	BMC Med Genomics	2018	1	0.2	-1
29182452	Exome Array Analysis of Nuclear Lens Opacity	Loomis SJ	Ophthalmic Epidemiol	2018	2	0.3	-1
31020160	Asymptomatic ventricular tachycardia: diagnostic pitfalls of Andersen-Tawil syndrome-a case report	Nguyen D	Eur Heart J Case Rep	2018	2	0.3	-1
29158013	Association study of schizophrenia with variants in miR-137 binding sites	Curtis D	Schizophr Res	2018	2	0.3	-1
30334909	Pharmacogenetic variants and response to neoadjuvant single-agent doxorubicin or docetaxel: a study in locally advanced breast cancer patients participating in the NCT00123929 phase 2 randomized trial	Ruiz-Pinto S	Pharmacogenet Genomics	2018	1	0.2	-1
30029070	Next-generation DNA sequencing to identify novel genetic risk factors for cerebral vein thrombosis	Gorski MM	Thromb Res	2018	1	0.2	-1
30166421	Targeted Gene Sequencing in Children with Crohn's Disease and Their Parents: Implications for Missing Heritability	Chen JS	G3 (Bethesda)	2018	1	0.2	-1
30560018	Spectrum and hematological profile of hereditary anemia in North Indians: SGPGI experience	Tripathi P	Intractable Rare Dis Res	2018	1	0.2	-1
29753700	Spectrum and prevalence of genetic predisposition in medulloblastoma: a retrospective genetic study and prospective validation in a clinical trial cohort	Waszak SM	Lancet Oncol	2018	154	25.7	2	Not gene-level associations
29689243	Whole-exome sequencing identifies unique mutations and copy number losses in calcifying fibrous tumor of the pleura: report of 3 cases and review of the literature	Mehrad M	Hum Pathol	2018	12	2	-1
29266521	Exonic mutations and exon skipping: Lessons learned from DFNA5	Booth KT	Hum Mutat	2018	26	4.3	2	Not gene-level associations
29767246	DNAJC3 mutation in Thai familial type 2 diabetes mellitus	Kulanuwat S	Int J Mol Med	2018	2	0.3	-1
29211899	Exome Sequencing and Genotyping Identify a Rare Variant in NLRP7 Gene Associated With Ulcerative Colitis	Onoufriadis A	J Crohns Colitis	2018	9	1.5	-1
30289878	Human genetic variation in GLS2 is associated with development of complicated Staphylococcus aureus bacteremia	Scott WK	PLoS Genet	2018	11	1.8	-1
29693246	Germline mutations in Protection of Telomeres 1 in two families with Hodgkin lymphoma	McMaster ML	Br J Haematol	2018	30	5	2	Not gene-level associations
29974457	Evidence of linkage to chromosome 5p13.2-q11.1 in a large inbred family with genetic generalized epilepsy	Kinay D	Epilepsia	2018	1	0.2	-1
30188893	Whole exome sequencing of ENU-induced thrombosis modifier mutations in the mouse	Tomberg K	PLoS Genet	2018	2	0.3	-1
29706352	Whole-Exome Sequencing Reveals Uncaptured Variation and Distinct Ancestry in the Southern African Population of Botswana	Retshabile G	Am J Hum Genet	2018	24	4	2	Not gene-level associations
33974636	Rare functional genetic variants in COL7A1, COL6A5, COL1A2 and COL5A2 frequently occur in Chiari Malformation Type 1	Urbizu A	PLoS One	2021	8	2.7	1
33397775	Novel Associations of BST1 and LAMP3 With REM Sleep Behavior Disorder	Mufti K	Neurology	2021	9	3	1
29500247	Whole exome sequencing identifies mutations in 10% of patients with familial non-syndromic cleft lip and/or palate in genes mutated in well-known syndromes	Basha M	J Med Genet	2018	44	7.3	2	Not gene-level associations
33483695	Investigating rare pathogenic/likely pathogenic exonic variation in bipolar disorder	Jia X	Mol Psychiatry	2021	10	3.3	1
29510755	Whole exome sequencing in three families segregating a pediatric case of sarcoidosis	Calender A	BMC Med Genomics	2018	8	1.3	-1
29463568	An exome-wide sequencing study of lipid response to high-fat meal and fenofibrate in Caucasians from the GOLDN cohort	Geng X	J Lipid Res	2018	5	0.8	-1
30183354	Utilizing Whole-Exome Sequencing to Characterize the Phenotypic Variability of Sickle Cell Disease	Alsultan A	Genet Test Mol Biomarkers	2018	9	1.5	-1
30868116	Exome sequencing identifies molecular diagnosis in children with drug-resistant epilepsy	Tsang MH	Epilepsia Open	2018	10	1.7	-1
30083469	Detection and benchmarking of somatic mutations in cancer genomes using RNA-seq data	Coudray A	PeerJ	2018	27	4.5	0	Method or review paper
30639324	Efficient Variant Set Mixed Model Association Tests for Continuous and Binary Traits in Large-Scale Whole-Genome Sequencing Studies	Chen H	Am J Hum Genet	2019	57	11.4	0	Method or review paper
31121167	Liver Fibrosis and Metabolic Alterations in Adults With alpha-1-antitrypsin Deficiency Caused by the Pi*ZZ Mutation	Hamesch K	Gastroenterology	2019	44	8.8	0	Not coding variant associations
32531060	Rare loss-of-function mutations of PTGIR are enriched in fibromuscular dysplasia	Georges A	Cardiovasc Res	2021	11	3.7	1
34582791	Whole-genome sequencing in diverse subjects identifies genetic correlates of leukocyte traits: The NHLBI TOPMed program	Mikhaylova AV	Am J Hum Genet	2021	11	3.7	1
31096927	GenePy - a score for estimating gene pathogenicity in individuals using next-generation sequencing data	Mossotto E	BMC Bioinformatics	2019	14	2.8	0	Method or review paper
31389005	Identification of a dominant MYH11 causal variant in chronic intestinal pseudo-obstruction: Results of whole-exome sequencing	Dong W	Clin Genet	2019	14	2.8	3	Can't access
30820038	Copy number variation analysis in bicuspid aortic valve-related aortopathy identifies TBX20 as a contributing gene	Luyckx I	Eur J Hum Genet	2019	12	2.4	-1
31869396	Herpes simplex encephalitis in adult patients with MASP-2 deficiency	Bibert S	PLoS Pathog	2019	13	2.6	0	Method or review paper
30367527	Exome sequencing in families with severe mental illness identifies novel and rare variants in genes implicated in Mendelian neuropsychiatric syndromes	Ganesh S	Psychiatry Clin Neurosci	2019	13	2.6	2	Not gene-level associations
30970187	Molecular Genetic Anatomy and Risk Profile of Hirschsprung's Disease	Tilghman JM	N Engl J Med	2019	65	13	0	Method or review paper
31217584	Genetic analyses of diverse populations improves discovery for complex traits	Wojcik GL	Nature	2019	400	80	0	Method or review paper
30399374	Genetics and epigenetics in obesity	Rohde K	Metabolism	2019	118	23.6	0	Method or review paper
30682063	Family-based association tests for rare variants with censored traits	Qi W	PLoS One	2019	1	0.2	-1
31296221	Meta-Qtest: meta-analysis of quadratic test for rare variants	Ka J	BMC Med Genomics	2019	0	0	-1
30849328	ACAT: A Fast and Powerful p Value Combination Method for Rare-Variant Analysis in Sequencing Studies	Liu Y	Am J Hum Genet	2019	109	21.8	0	Method or review paper
31320640	Whole-genome landscape of mucosal melanoma reveals diverse drivers and therapeutic targets	Newell F	Nat Commun	2019	100	20	2	Not coding variant associations
30948140	Genetic analysis of DNA methylation and hydroxymethylation genes in Parkinson's disease	Shu L	Neurobiol Aging	2019	6	1.2	-1
30930780	Actionable Pharmacogenetic Variation in the Slovenian Genomic Database	Hočevar K	Front Pharmacol	2019	6	1.2	-1
33239198	Association study of DNAJC13, UCHL1, HTRA2, GIGYF2, and EIF4G1 with Parkinson's disease	Saini P	Neurobiol Aging	2021	11	3.7	1
31235738	Multiple Sclerosis patients carry an increased burden of exceedingly rare genetic variants in the inflammasome regulatory genes	Vidmar L	Sci Rep	2019	19	3.8	2	Not gene-level associations
33602785	Loss-of-Function Variants in the Tumor-Suppressor Gene PTPN14 Confer Increased Cancer Risk	Olafsdottir T	Cancer Res	2021	11	3.7	1
29750252	Whole-Exome Sequencing of an Exceptional Longevity Cohort	Nygaard HB	J Gerontol A Biol Sci Med Sci	2019	8	1.6	-1
31123420	Whole exome sequencing of multiple meningiomas with varying histopathological presentation in one patient revealed distinctive somatic mutation burden and independent clonal origins	Sheng HS	Cancer Manag Res	2019	8	1.6	-1
30287925	Variants affecting diverse domains of MEPE are associated with two distinct bone disorders, a craniofacial bone defect and otosclerosis	Schrauwen I	Genet Med	2019	11	2.2	-1
34324492	Integrative analysis of genomic variants reveals new associations of candidate haploinsufficient genes with congenital heart disease	Audain E	PLoS Genet	2021	12	4	1
31668701	Evolution and Impact of Subclonal Mutations in Papillary Thyroid Cancer	Masoodi T	Am J Hum Genet	2019	14	2.8	0	Not coding variant associations
31087445	Rare variant association testing for multicategory phenotype	Bocher O	Genet Epidemiol	2019	2	0.4	-1
28968627	Association score testing for rare variants and binary traits in family data with shared controls	Saad M	Brief Bioinform	2019	2	0.4	-1
30828345	Whole Exome Sequencing Identifies a Novel Predisposing Gene, MAPKAP1, for Familial Mixed Mood Disorder	Yang C	Front Genet	2019	2	0.4	-1
30911827	SORL1 genetic variants and Alzheimer disease risk: a literature review and meta-analysis of sequencing data	Campion D	Acta Neuropathol	2019	42	8.4	0	Method or review paper
30956231	Data-adaptive multi-locus association testing in subjects with arbitrary genealogical relationships	Gong G	Stat Appl Genet Mol Biol	2019	1	0.2	-1
30506204	Prenatal Diagnosis by Whole Exome Sequencing in Fetuses with Ultrasound Abnormalities	Felice V	Methods Mol Biol	2019	1	0.2	-1
31515285	A-to-I RNA editing contributes to the persistence of predicted damaging mutations in populations	Mai TL	Genome Res	2019	2	0.4	-1
30664068	Spectrum of GABAA receptor variants in epilepsy	Maljevic S	Curr Opin Neurol	2019	36	7.2	0	Not coding variant associations
30924900	Association of Rare Coding Mutations With Alzheimer Disease and Other Dementias Among Adults of European Ancestry	Patel D	JAMA Netw Open	2019	40	8	2	Not gene-level associations
31827489	Affected Sib-Pair Analyses Identify Signaling Networks Associated With Social Behavioral Deficits in Autism	Pirooznia M	Front Genet	2019	1	0.2	-1
31053105	Identification of novel sarcoma risk genes using a two-stage genome wide DNA sequencing strategy in cancer cluster families and population case and control cohorts	Jones RM	BMC Med Genet	2019	1	0.2	-1
30655504	Assessment of somatic single-nucleotide variation in brain tissue of cases with schizophrenia	Fullard JF	Transl Psychiatry	2019	10	2	-1
30931973	Identifying Rare Variant Associations in Admixed Populations	Qin H	Sci Rep	2019	3	0.6	-1
30642840	Targeted Resequencing of the Coding Sequence of 38 Genes Near Breast Cancer GWAS Loci in a Large Case-Control Study	Decker B	Cancer Epidemiol Biomarkers Prev	2019	3	0.6	-1
30925779	Integrated Somatic and Germline Whole-Exome Sequencing Analysis in Women with Lung Cancer after a Previous Breast Cancer	Coco S	Cancers (Basel)	2019	2	0.4	-1
31799121	Rare GBA1 genotype associated with severe bone disease in Gaucher disease type 1	d'Avila Paskulin L	Mol Genet Metab Rep	2019	2	0.4	-1
31608925	Polygenic burden in focal and generalized epilepsies	Leu C	Brain	2019	36	7.2	2	Not gene-level associations
34626176	Whole-exome sequencing reveals a role of HTRA1 and EGFL8 in brain white matter hyperintensities	Malik R	Brain	2021	13	4.3	1
31053132	Systematic characterization of germline variants from the DiscovEHR study endometrial carcinoma population	Miller JE	BMC Med Genomics	2019	2	0.4	-1
31200944	A transgenic mouse model reproduces human hereditary systemic amyloidosis	Chabert M	Kidney Int	2019	2	0.4	-1
30707351	Whole-genome sequencing identifies complex contributions to genetic risk by variants in genes causing monogenic systemic lupus erythematosus	Almlöf JC	Hum Genet	2019	32	6.4	2	Not coding variant associations
33208543	Mutational Analysis of Known ALS Genes in an Italian Population-Based Cohort	Grassano M	Neurology	2021	14	4.7	1
30828412	Protein structure aids predicting functional perturbation of missense variants in SCN5A and KCNQ1	Kroncke BM	Comput Struct Biotechnol J	2019	10	2	-1
30671673	Leveraging linkage evidence to identify low-frequency and rare variants on 16p13 associated with blood pressure using TOPMed whole genome sequencing data	He KY	Hum Genet	2019	11	2.2	-1
30925911	Rare RNF213 variants and the risk of intracranial artery stenosis/occlusion disease in Chinese population: a case-control study	Liao X	BMC Med Genet	2019	7	1.4	-1
31063268	Accumulation of rare coding variants in genes implicated in risk of human cleft lip with or without cleft palate	Marini NJ	Am J Med Genet A	2019	7	1.4	-1
31036833	Exome sequencing in patients with chronic central serous chorioretinopathy	Schellevis RL	Sci Rep	2019	7	1.4	-1
31234228	Association of MAPT H1 subhaplotypes with neuropathology of lewy body disease	Heckman MG	Mov Disord	2019	8	1.6	-1
33326012	Assessing the Role of Rare Genetic Variation in Patients With Heart Failure	Povysil G	JAMA Cardiol	2021	15	5	1
31112425	Assessment and Validation of a Phenotype-Enhanced Variant Classification Framework to Promote or Demote RYR2 Missense Variants of Uncertain Significance	Giudicessi JR	Circ Genom Precis Med	2019	23	4.6	0	Method or review paper
31369557	Targeted sequencing of candidate genes of dyslipidemia in Punjabi Sikhs: Population-specific rare variants in GCKR promote ectopic fat deposition	Sanghera DK	PLoS One	2019	6	1.2	-1
33932343	Sub-genic intolerance, ClinVar, and the epilepsies: A whole-exome sequencing study of 29,165 individuals	Epi25 Collaborative. Electronic address: jm4279@cumc.columbia.edu	Am J Hum Genet	2021	16	5.3	1
31464824	Evaluation of the contribution of germline variants in BRCA1 and BRCA2 to uveal and cutaneous melanoma	Johansson PA	Melanoma Res	2019	6	1.2	-1
29767774	Common and Rare Variants Genetic Association Analysis of Cigarettes per Day Among Ever-Smokers in Chronic Obstructive Pulmonary Disease Cases and Controls	Lutz SM	Nicotine Tob Res	2019	6	1.2	-1
30664045	In-silico investigation of coding variants potentially affecting the functioning of the glutamatergic N-methyl-D-aspartate receptor in schizophrenia	Tsavou A	Psychiatr Genet	2019	6	1.2	-1
30719225	Genomic characterization of metastatic ultra-hypermutated interdigitating dendritic cell sarcoma through rapid research autopsy	Chen HZ	Oncotarget	2019	6	1.2	-1
30706509	Gene-based sequential burden association test	Chen Z	Stat Med	2019	5	1	-1
31296657	A cysteinyl-tRNA synthetase variant confers resistance against selenite toxicity and decreases selenocysteine misincorporation	Hoffman KS	J Biol Chem	2019	8	1.6	-1
30833958	Identification of the Germline Mutation Profile in Esophageal Squamous Cell Carcinoma by Whole Exome Sequencing	Deng J	Front Genet	2019	8	1.6	-1
31025220	Association of HIF1A and Parkinson's disease in a Han Chinese population demonstrated by molecular inversion probe analysis	Qin L	Neurol Sci	2019	8	1.6	-1
34903660	High-impact rare genetic variants in severe schizophrenia	Zoghbi AW	Proc Natl Acad Sci U S A	2021	17	5.7	1
31686978	Primary dedifferentiated liposarcoma of the orbit, a rare entity: Case report and review of literature	Andrea T	Saudi J Ophthalmol	2019	3	0.6	-1
31386834	CDKN2B gene expression is affected by 9p21.3 rs10757278 in CAD patients, six months after the MI	Zivotić I	Clin Biochem	2019	3	0.6	-1
31616476	Genetic Testing in Prion Disease: Psychological Consequences of the Decisions to Know or Not to Know	Schwartz M	Front Genet	2019	3	0.6	-1
31354645	Host Genetics, Innate Immune Responses, and Cellular Death Pathways in Poliomyelitis Patients	Andersen NB	Front Microbiol	2019	3	0.6	-1
31042289	Exome Sequencing of a Primary Ovarian Insufficiency Cohort Reveals Common Molecular Etiologies for a Spectrum of Disease	Jolly A	J Clin Endocrinol Metab	2019	30	6	2	Not gene-level associations
31134136	Comprehensive Analysis of Rare Variants of 101 Autism-Linked Genes in a Hungarian Cohort of Autism Spectrum Disorder Patients	Balicza P	Front Genet	2019	9	1.8	-1
30985895	MYRF haploinsufficiency causes 46,XY and 46,XX disorders of sex development: bioinformatics consideration	Hamanaka K	Hum Mol Genet	2019	9	1.8	-1
31242253	Pharmacogenomics of statin-related myopathy: Meta-analysis of rare variants from whole-exome sequencing	Floyd JS	PLoS One	2019	9	1.8	-1
31801548	High Plasmodium falciparum genetic diversity and temporal stability despite control efforts in high transmission settings along the international border between Zambia and the Democratic Republic of the Congo	Pringle JC	Malar J	2019	9	1.8	-1
30664616	Family-based exome sequencing and case-control analysis implicate CEP41 as an ASD gene	Patowary A	Transl Psychiatry	2019	10	2	-1
29553866	Targeted deep sequencing of the PEAR1 locus for platelet aggregation in European and African American families	Keramati AR	Platelets	2019	10	2	-1
30777654	Neuropathological and genetic characteristics of a post-mortem series of cases with dementia with Lewy bodies clinically suspected of Creutzfeldt-Jakob's disease	Geut H	Parkinsonism Relat Disord	2019	10	2	-1
30598256	Systematically analyzing rare variants of autosomal-dominant genes for sporadic Parkinson's disease in a Chinese cohort	Yang N	Neurobiol Aging	2019	10	2	-1
30355605	Burden of rare variants in causative genes for amyotrophic lateral sclerosis (ALS) accelerates age at onset of ALS	Naruse H	J Neurol Neurosurg Psychiatry	2019	16	3.2	2	Not gene-level associations
33504798	The contribution of X-linked coding variation to severe developmental disorders	Martin HC	Nat Commun	2021	18	6	1
31543881	Endocrine Disorders Are Prominent Clinical Features in Patients With Primary Antibody Deficiencies	Coopmans EC	Front Immunol	2019	5	1	-1
31132892	Candidate gene variant effects on language disorders in Robinson Crusoe Island	Mountford HS	Ann Hum Biol	2019	5	1	-1
30314817	EIF2AK3 variants in Dutch patients with Alzheimer's disease	Wong TH	Neurobiol Aging	2019	5	1	-1
30700791	A suite of automated sequence analyses reduces the number of candidate deleterious variants and reveals a difference between probands and unaffected siblings	Gu F	Genet Med	2019	5	1	-1
31712784	Genetic and immune profiling for potential therapeutic targets in adult human craniopharyngioma	Kassab C	Clin Oncol Res	2019	5	1	-1
30776432	Dynamic Evolution of Clonal Composition and Neoantigen Landscape in Recurrent Metastatic Melanoma with a Rare Combination of Driver Mutations	Davidson G	J Invest Dermatol	2019	5	1	-1
31108397	Rare homozygosity in amyotrophic lateral sclerosis suggests the contribution of recessive variants to disease genetics	Goldstein O	J Neurol Sci	2019	5	1	-1
30686506	Contribution of Rare Copy Number Variants to Bipolar Disorder Risk Is Limited to Schizoaffective Cases	Charney AW	Biol Psychiatry	2019	24	4.8	0	Copy number variants
33651715	DUOX2 variants associate with preclinical disturbances in microbiota-immune homeostasis and increased inflammatory bowel disease risk	Grasberger H	J Clin Invest	2021	18	6	1
31227496	Evolutionary Routes in Metastatic Uveal Melanomas Depend on MBD4 Alterations	Rodrigues M	Clin Cancer Res	2019	25	5	0	Not coding variant associations
31363759	Rare and common variant discovery in complex disease: the IBD case study	Venkataraman GR	Hum Mol Genet	2019	9	1.8	-1
31244663	Star Allele-Based Haplotyping versus Gene-Wise Variant Burden Scoring for Predicting 6-Mercaptopurine Intolerance in Pediatric Acute Lymphoblastic Leukemia Patients	Park Y	Front Pharmacol	2019	9	1.8	-1
30616676	Optic nerve thinning and neurosensory retinal degeneration in the rTg4510 mouse model of frontotemporal dementia	Harrison IF	Acta Neuropathol Commun	2019	10	2	-1
29986575	Radiation Therapy Outcome and Clinical Features of Duodenal-Type Follicular Lymphoma	Lee H	Cancer Res Treat	2019	4	0.8	-1
33813136	Burden of rare variants in synaptic genes in patients with severe tinnitus: An exome based extreme phenotype study	Amanat S	EBioMedicine	2021	18	6	1
31495607	Salivary duct carcinoma: A case report of oncocytic variant with possible treatment implications and review of literature	Sekhri R	Pathol Res Pract	2019	4	0.8	-1
31566422	An evaluation of patisiran: a viable treatment option for transthyretin-related hereditary amyloidosis	Milani P	Expert Opin Pharmacother	2019	4	0.8	-1
29412113	Screening for Rare Genetic Variants Associated with Atherosclerosis: Opportunity for Personalized Medicine	Peterlin A	Curr Vasc Pharmacol	2019	4	0.8	-1
31341245	Oncogenic effects of germline variants in lysosomal storage disease genes	Shin J	Genet Med	2019	3	0.6	-1
31094706	Imbalanced mitochondrial function provokes heterotaxy via aberrant ciliogenesis	Burkhalter MD	J Clin Invest	2019	26	5.2	0	Not coding variant associations
34125151	DIAPH1 Variants in Non-East Asian Patients With Sporadic Moyamoya Disease	Kundishora AJ	JAMA Neurol	2021	19	6.3	1
30298564	Multi-SKAT: General framework to test for rare-variant association with multiple phenotypes	Dutta D	Genet Epidemiol	2019	27	5.4	0	Method or review paper
31489468	Multiple Fractures and Impaired Bone Fracture Healing in a Patient with Pycnodysostosis and Hypophosphatasia	Hepp N	Calcif Tissue Int	2019	3	0.6	-1
30816480	Increased burden of rare deleterious variants of the KCNQ1 gene in patients with large‑vessel ischemic stroke	Janicki PK	Mol Med Rep	2019	3	0.6	-1
32853339	Germline Sequencing DNA Repair Genes in 5545 Men With Aggressive and Nonaggressive Prostate Cancer	Darst BF	J Natl Cancer Inst	2021	21	7	1
30978332	Lung Transplant Outcomes in Patients With Pulmonary Fibrosis With Telomere-Related Gene Variants	Swaminathan AC	Chest	2019	32	6.4	0	Not coding variant associations
30537345	Linear mixed models for association analysis of quantitative traits with next-generation sequencing data	Chiu CY	Genet Epidemiol	2019	3	0.6	-1
28753857	The Impact of Plasmacytoid Variant Histology on the Survival of Patients with Urothelial Carcinoma of Bladder after Radical Cystectomy	Li Q	Eur Urol Focus	2019	25	5	0	Not coding variant associations
31589614	Optimizing clinical exome design and parallel gene-testing for recessive genetic conditions in preconception carrier screening: Translational research genomic data from 14,125 exomes	Capalbo A	PLoS Genet	2019	25	5	0	Method or review paper
31150472	Multiple rare and common variants in APOB gene locus associated with oxidatively modified low-density lipoprotein levels	Khlebus E	PLoS One	2019	5	1	-1
30408610	Phenotyping and genotyping of skeletal dysplasias: Evolution of a center and a decade of experience in India	Uttarilli A	Bone	2019	5	1	-1
31413120	Genetic factors contributing to autism spectrum disorder in Williams-Beuren syndrome	Codina-Sola M	J Med Genet	2019	5	1	-1
30629617	Increased frequency of rare missense PPP1R3B variants among Danish patients with type 2 diabetes	Niazi RK	PLoS One	2019	5	1	-1
30718883	Case-control analysis identifies shared properties of rare germline variation in cancer predisposing genes	Artomov M	Eur J Hum Genet	2019	4	0.8	-1
34183866	Exome sequencing in obsessive-compulsive disorder reveals a burden of rare damaging coding variants	Halvorsen M	Nat Neurosci	2021	21	7	1
32651235	Whole exome sequencing analyses reveal gene-microbiota interactions in the context of IBD	Hu S	Gut	2021	21	7	1
30307693	Copy number variation and neuropsychiatric problems in females and males in the general population	Martin J	Am J Med Genet B Neuropsychiatr Genet	2019	14	2.8	0	Copy number variants
33349842	Targeted sequencing of Parkinson's disease loci genes highlights SYT11, FGF20 and other associations	Rudakou U	Brain	2021	22	7.3	1
31196716	Rare inherited missense variants of POGZ associate with autism risk and disrupt neuronal development	Zhao W	J Genet Genomics	2019	9	1.8	-1
31239751	Tracing the effect of the melanocortin-4 receptor pathway in obesity: study design and methodology of the TEMPO registry	Eneli I	Appl Clin Genet	2019	9	1.8	-1
30976013	Exome array analysis of rare and low frequency variants in amyotrophic lateral sclerosis	Dekker AM	Sci Rep	2019	11	2.2	-1
31275357	metaFARVAT: An Efficient Tool for Meta-Analysis of Family-Based, Case-Control, and Population-Based Rare Variant Association Studies	Wang L	Front Genet	2019	0	0	-1
30998139	[NPM1 High Mutant Allele Burden is an Adverse Prognostic Factor for AML Patients with Mutated NPM1]	Hou JX	Zhongguo Shi Yan Xue Ye Xue Za Zhi	2019	0	0	-1
30380176	CRTC1-MAML2 fusion in mucoepidermoid carcinoma of the breast	Bean GR	Histopathology	2019	13	2.6	3	Can't access
31094488	Truncating variant burden in high-functioning autism and pleiotropic effects of LRP1 across psychiatric phenotypes	Torrico B	J Psychiatry Neurosci	2019	12	2.4	-1
30258123	A weighted burden test using logistic regression for integrated analysis of sequence variants, copy number variants and polygenic risk score	Curtis D	Eur J Hum Genet	2019	12	2.4	-1
30190612	Rare variants in the genetic background modulate cognitive and developmental phenotypes in individuals carrying disease-associated variants	Pizzo L	Genet Med	2019	85	17	2	Not gene-level associations
34273592	Loss-of-function mutations in IFNAR2 in COVID-19 severe infection susceptibility	Smieszek SP	J Glob Antimicrob Resist	2021	22	7.3	1
31768057	Autism spectrum disorder and attention deficit hyperactivity disorder have a similar burden of rare protein-truncating variants	Satterstrom FK	Nat Neurosci	2019	90	18	2	Not gene-level associations
31003785	Genome-wide Burden of Rare Short Deletions Is Enriched in Major Depressive Disorder in Four Cohorts	Zhang X	Biol Psychiatry	2019	12	2.4	-1
30578417	The copy number variation landscape of congenital anomalies of the kidney and urinary tract	Verbitsky M	Nat Genet	2019	84	16.8	0	Copy number variants
33432171	Exome-wide evaluation of rare coding variants using electronic health records identifies new gene-phenotype associations	Park J	Nat Med	2021	26	8.7	1
31279534	Targeted Treatment of Individuals With Psychosis Carrying a Copy Number Variant Containing a Genomic Triplication of the Glycine Decarboxylase Gene	Bodkin JA	Biol Psychiatry	2019	20	4	0	Copy number variants
31072097	Multiplex Enrichment and Detection of Rare KRAS Mutations in Liquid Biopsy Samples using Digital Droplet Pre-Amplification	Pratt ED	Anal Chem	2019	7	1.4	-1
31666091	Sequence characterization of RET in 117 Chinese Hirschsprung disease families identifies a large burden of de novo and parental mosaic mutations	Jiang Q	Orphanet J Rare Dis	2019	7	1.4	-1
31619059	Spectrum of Mutations and Long-Term Clinical Outcomes in Genetic Chylomicronemia Syndromes	D'Erasmo L	Arterioscler Thromb Vasc Biol	2019	19	3.8	0	Not coding variant associations
31598133	Functional rare variants influence the clinical response to anti-TNF therapy in Crohn's disease	Chaparro M	Therap Adv Gastroenterol	2019	1	0.2	-1
31581212	eQTL mapping of rare variant associations using RNA-seq data: An evaluation of approaches	Lutz SM	PLoS One	2019	1	0.2	-1
31095348	Topical Diacerein Ointment for Epidermolysis Bullosa Simplex: A Review	Limmer AL	Skin Therapy Lett	2019	1	0.2	-1
31088516	Identification of genetic association between cardiorespiratory fitness and the trainability genes in childhood acute lymphoblastic leukemia survivors	Caru M	BMC Cancer	2019	1	0.2	-1
30994872	Association of Rare Copy Number Variants With Risk of Depression	Kendall KM	JAMA Psychiatry	2019	51	10.2	2	Copy number variants
30962222	Targeting CD47 in Sézary syndrome with SIRPαFc	Johnson LDS	Blood Adv	2019	50	10	0	Not coding variant associations
31645727	Somatic mutations and clonal dynamics in healthy and cirrhotic human liver	Brunner SF	Nature	2019	142	28.4	0	Not coding variant associations
31033776	Determining population stratification and subgroup effects in association studies of rare genetic variants for nicotine dependence	Hsieh AR	Psychiatr Genet	2019	0	0	-1
33971972	Rare variant analysis of 4241 pulmonary arterial hypertension cases from an international consortium implicates FBLN2, PDGFD, and rare de novo variants in PAH	Zhu N	Genome Med	2021	26	8.7	1
30724488	Exome sequencing in families with chronic central serous chorioretinopathy	Schellevis RL	Mol Genet Genomic Med	2019	7	1.4	-1
31100703	Characterization of rare NEIL1 variants found in East Asian populations	Minko IG	DNA Repair (Amst)	2019	7	1.4	-1
31398428	Evidence of association of the DISC1 interactome gene set with schizophrenia from GWAS	Facal F	Prog Neuropsychopharmacol Biol Psychiatry	2019	6	1.2	-1
31134825	A neuropsychological and behavioral study of PLS	de Vries BS	Amyotroph Lateral Scler Frontotemporal Degener	2019	6	1.2	-1
30976018	Rare variants in SLC5A10 are associated with serum 1,5-anhydroglucitol (1,5-AG) in the Atherosclerosis Risk in Communities (ARIC) Study	Loomis SJ	Sci Rep	2019	6	1.2	-1
30860568	Gene-based association tests using GWAS summary statistics	Svishcheva GR	Bioinformatics	2019	14	2.8	0	Method or review paper
31747953	Identifying genetic variants underlying medication-induced osteonecrosis of the jaw in cancer and osteoporosis: a case control study	Lee KH	J Transl Med	2019	12	2.4	-1
30497801	Primary anorectal melanoma: clinical, immunohistology and DNA analysis of 43 cases	Dodds TJ	Pathology	2019	11	2.2	-1
30669967	Real world scenarios in rare variant association analysis: the impact of imbalance and sample size on the power in silico	Zhang X	BMC Bioinformatics	2019	11	2.2	-1
30392412	Joint Contributions of Rare Copy Number Variants and Common SNPs to Risk for Schizophrenia	Bergen SE	Am J Psychiatry	2019	59	11.8	0	Copy number variants
30293238	Estimating contribution of rare non-coding variants to neuropsychiatric disorders	Takata A	Psychiatry Clin Neurosci	2019	13	2.6	2	Not coding variant associations
31190668	In trans variant calling reveals enrichment for compound heterozygous variants in genes involved in neuronal development and growth	Cox AJ	Genet Res (Camb)	2019	2	0.4	-1
31021519	Mutation update for the SATB2 gene	Zarate YA	Hum Mutat	2019	21	4.2	2	Method or review paper
31856884	Novel mutations in the 3-box motif of the BACK domain of KLHL7 associated with nonsyndromic autosomal dominant retinitis pigmentosa	Oh JK	Orphanet J Rare Dis	2019	3	0.6	-1
31791231	A probabilistic method for leveraging functional annotations to enhance estimation of the temporal order of pathway mutations during carcinogenesis	Wang M	BMC Bioinformatics	2019	0	0	-1
31271844	Cancer classification and pathway discovery using non-negative matrix factorization	Zeng Z	J Biomed Inform	2019	15	3	2	Method or review paper
34263907	Alpha-protein kinase 3 (ALPK3) truncating variants are a cause of autosomal dominant hypertrophic cardiomyopathy	Lopes LR	Eur Heart J	2021	27	9	1
30898364	Using Human Genetics to Drive Drug Discovery: A Perspective	Fox CS	Am J Kidney Dis	2019	3	0.6	-1
31160347	Discovery of a Pathogenic Variant rs139379666 (p. P2974L) in ATM for Breast Cancer Risk in Chinese Populations	Guo X	Cancer Epidemiol Biomarkers Prev	2019	3	0.6	-1
30247636	Inherited thrombocytopenia associated with mutation of UDP-galactose-4-epimerase (GALE)	Seo A	Hum Mol Genet	2019	22	4.4	2	Not coding variant associations
31591475	Contribution of SLC22A12 on hypouricemia and its clinical significance for screening purposes	Cha DH	Sci Rep	2019	11	2.2	-1
29873607	Linkage analysis and whole exome sequencing identify a novel candidate gene in a Dutch multiple sclerosis family	Mescheriakova JY	Mult Scler	2019	9	1.8	-1
30568185	Phospholipase C-Gamma 2 Activity in Familial Steroid-Sensitive Nephrotic Syndrome	Parker L	Pediatr Res	2019	4	0.8	-1
31663907	Identification of a Novel Candidate Gene for Serrated Polyposis Syndrome Germline Predisposition by Performing Linkage Analysis Combined With Whole-Exome Sequencing	Toma C	Clin Transl Gastroenterol	2019	4	0.8	-1
30132154	Mutation heterogeneity between primary gastric cancers and their matched lymph node metastases	Lee HH	Gastric Cancer	2019	11	2.2	-1
30337193	Evaluation of novel Parkinson's disease candidate genes in the Chinese population	Chew EGY	Neurobiol Aging	2019	7	1.4	-1
31921204	Exome Sequencing Identifies Susceptibility Loci for Sarcoidosis Prognosis	Lahtela E	Front Immunol	2019	8	1.6	-1
30856701	[From coding sequence to non-protein coding region: advances in cleft lip and palate genetic mechanism researches]	Zhang YF	Zhonghua Kou Qiang Yi Xue Za Zhi	2019	0	0	-1
31363385	Recent advances and perspectives in next generation sequencing application to the genetic research of type 2 diabetes	Nasykhova YA	World J Diabetes	2019	5	1	-1
30863429	An Exome-Wide Sequencing Study of the GOLDN Cohort Reveals Novel Associations of Coding Variants and Fasting Plasma Lipids	Geng X	Front Genet	2019	1	0.2	-1
32463623	Genetic Sequencing of Pediatric Patients Identifies Mutations in Monogenic Inflammatory Bowel Disease Genes that Translate to Distinct Clinical Phenotypes	Ashton JJ	Clin Transl Gastroenterol	2020	11	2.8	2	Method or review paper
30991114	Next generation sequencing in recurrent pregnancy loss-approaches and outcomes	Rajcan-Separovic E	Eur J Med Genet	2020	12	3	0	Method or review paper
32383311	TRPV6 variants confer susceptibility to chronic pancreatitis in the Chinese population	Zou WB	Hum Mutat	2020	11	2.8	3	Can't access
34115965	Pan-ancestry exome-wide association analyses of COVID-19 outcomes in 586,157 individuals	Kosmicki JA	Am J Hum Genet	2021	56	18.7	1
33489804	Whole exome sequencing (WES) analysis of transformed small cell lung cancer (SCLC) from lung adenocarcinoma (LUAD)	Xie T	Transl Lung Cancer Res	2020	11	2.8	2	Not gene-level associations
32616874	Molecular characterization of chromophobe renal cell carcinoma reveals mTOR pathway alterations in patients with poor outcome	Roldan-Romero JM	Mod Pathol	2020	12	3	0	Not coding variant associations
32707456	Novel and reported variants in Parkinson's disease genes confer high disease burden among Indians	Kumar S	Parkinsonism Relat Disord	2020	13	3.2	3	Can't access
32898326	Genetic modifiers of long-term survival in sickle cell anemia	Wonkam A	Clin Transl Med	2020	11	2.8	2	Not gene-level associations
32850052	Alien hand syndrome - a rare presentation of stroke	Le K	J Community Hosp Intern Med Perspect	2020	1	0.2	-1
33548076	Whole genome sequencing identifies novel genetic mutations in patients with eczema herpeticum			2021	8	4	1	Additional curation
31980526	Precision medicine integrating whole-genome sequencing, comprehensive metabolomics, and advanced imaging	Hou YC	Proc Natl Acad Sci U S A	2020	43	10.8	0	Method or review paper
32225115	Added Value of Clinical Sequencing: WGS-Based Profiling of Pharmacogenes	Caspar SM	Int J Mol Sci	2020	13	3.2	0	Method or review paper
32241265	Adaptive Fisher method detects dense and sparse signals in association analysis of SNV sets	Cai X	BMC Med Genomics	2020	1	0.2	-1
32117775	The Rare Variant rs35356162 in UHRF1BP1 Increases Bladder Cancer Risk in Han Chinese Population	Wu J	Front Oncol	2020	7	1.8	-1
32934340	Identification of UBAP1 mutations in juvenile hereditary spastic paraplegia in the 100,000 Genomes Project	Bourinaris T	Eur J Hum Genet	2020	7	1.8	-1
32342491	The natural course of pregnancies in women with primary atypical haemolytic uraemic syndrome and asymptomatic relatives	Timmermans SAMEG	Br J Haematol	2020	7	1.8	-1
32371107	Genetic analysis of N6-methyladenosine modification genes in Parkinson's disease	Qin L	Neurobiol Aging	2020	19	4.8	3	Can't access
32414862	Avelumab in patients with previously treated metastatic Merkel cell carcinoma: long-term data and biomarker analyses from the single-arm phase 2 JAVELIN Merkel 200 trial	D'Angelo SP	J Immunother Cancer	2020	73	18.2	0	Not coding variant associations
32461655	Transcript expression-aware annotation improves rare variant interpretation	Cummings BB	Nature	2020	90	22.5	0	Not coding variant associations
34113005	Rare variants in KDR, encoding VEGF Receptor 2, are associated with tetralogy of Fallot			2021	6	3	1	Additional curation
34662886	Exome sequencing and analysis of 454,787 UK Biobank participants			2021	237	118.5	1	Additional curation
32970752	Burden of rare deleterious variants in WNT signaling genes among 511 myelomeningocele patients	Hebert L	PLoS One	2020	7	1.8	-1
31837001	Discovery of rare coding variants in OGDHL and BRCA2 in relation to breast cancer risk in Chinese women	Guo X	Int J Cancer	2020	7	1.8	-1
30722798	A joint study of whole exome sequencing and structural MRI analysis in major depressive disorder	Zhang Y	Psychol Med	2020	13	3.2	3	Can't access
34375979	Rare variant contribution to human disease in 281,104 UK Biobank exomes			2021	135	67.5	1	Additional curation
31843756	Leveraging Family History in Case-Control Analyses of Rare Variation	Solis-Lemus CR	Genetics	2020	0	0	-1
33392048	Validation of PHASE for deriving N-acetyltransferase 2 haplotypes in the Western Cape mixed ancestry population	Swart C	Afr J Lab Med	2020	0	0	-1
32020597	Weighted burden analysis of exome-sequenced late-onset Alzheimer's cases and controls provides further evidence for a role for PSEN1 and suggests involvement of the PI3K/Akt/GSK-3β and WNT signalling pathways	Curtis D	Ann Hum Genet	2020	12	3	3	Can't access
33264630	Rare Variant Burden Analysis within Enhancers Identifies CAV1 as an ALS Risk Gene	Cooper-Knock J	Cell Rep	2020	13	3.2	2	Not coding variant associations
32254024	Germline burden of rare damaging variants negatively affects human healthspan and lifespan	Shindyapina AV	Elife	2020	10	2.5	1
32141622	Testing association of rare genetic variants with resistance to three common antiseizure medications	Wolking S	Epilepsia	2020	11	2.8	1
33157009	NCKAP1 Disruptive Variants Lead to a Neurodevelopmental Disorder with Core Features of Autism	Guo H	Am J Hum Genet	2020	11	2.8	1
31767120	Characterization of Single Gene Copy Number Variants in Schizophrenia	Szatkiewicz JP	Biol Psychiatry	2020	9	2.2	-1
31769566	Recurrent arginine substitutions in the ACTG2 gene are the primary driver of disease burden and severity in visceral myopathy	Assia Batzir N	Hum Mutat	2020	14	3.5	0	Not coding variant associations
33109575	Sequencing of Sclerosing Microcystic Adenocarcinoma Identifies Mutational Burden and Somatic Variants Associated With Tumorigenesis	Jiang R	Anticancer Res	2020	5	1.2	-1
31730227	Phenotypic delineation of the retinal arterial macroaneurysms with supravalvular pulmonic stenosis syndrome	Alkuraya H	Clin Genet	2020	4	1	-1
32574388	The genomic profile of parathyroid carcinoma based on whole-genome sequencing	Hu Y	Int J Cancer	2020	15	3.8	2	Not coding variant associations
33046855	Evidence for secondary-variant genetic burden and non-random distribution across biological modules in a recessive ciliopathy	Kousi M	Nat Genet	2020	15	3.8	0	Not coding variant associations
32575483	Small Cell Carcinoma of the Ovary, Hypercalcemic Type (SCCOHT) beyond SMARCA4 Mutations: A Comprehensive Genomic Analysis	Auguste A	Cells	2020	14	3.5	2	Not gene-level associations
33136635	Burden of Rare Variants in the OTOG Gene in Familial Meniere's Disease	Roman-Naranjo P	Ear Hear	2020	24	6	3	Can't access
32322022	Morphologic and genetic heterogeneity in breast fibroepithelial lesions-a comprehensive mapping study	Tan BY	Mod Pathol	2020	5	1.2	-1
32040686	The implications of BRCA loss of heterozygosity (LOH) and deficient mismatch repair gene (dMMR) expression in the breast cancer of a patient with both inherited breast and ovarian cancer syndrome (BRCA2) and Lynch syndrome (MLH1)	Sorscher S	Breast Cancer Res Treat	2020	5	1.2	-1
32993725	Clinical characteristics of patients from Quebec, Canada, with Morquio A syndrome: a longitudinal observational study	Moisan L	Orphanet J Rare Dis	2020	5	1.2	-1
32171629	Correlations Among Genotype and Outcome in Chinese Male Patients With Congenital Hypogonadotropic Hypogonadism Under HCG Treatment	Chen Y	J Sex Med	2020	5	1.2	-1
31959546	Comprehensive Assessment of Immuno-oncology Biomarkers in Adenocarcinoma, Urothelial Carcinoma, and Squamous-cell Carcinoma of the Bladder	Necchi A	Eur Urol	2020	25	6.2	0	Not coding variant associations
32081867	An integrated analysis of rare CNV and exome variation in Autism Spectrum Disorder using the Infinium PsychArray	Bacchelli E	Sci Rep	2020	25	6.2	0	Copy number variants
31680443	Burden of rare exome sequence variants in PROC gene is associated with venous thromboembolism: a population-based study	Tang W	J Thromb Haemost	2020	5	1.2	-1
30532020	Polygenic disruption of retinoid signalling in schizophrenia and a severe cognitive deficit subtype	Reay WR	Mol Psychiatry	2020	15	3.8	1
32100372	Convex combination sequence kernel association test for rare-variant studies	Posner DC	Genet Epidemiol	2020	3	0.8	-1
32577763	Modelling and treating GRIN2A developmental and epileptic encephalopathy in mice	Amador A	Brain	2020	31	7.8	0	Copy number variants
32873781	Identification of de novo mutations in prenatal neurodevelopment-associated genes in schizophrenia in two Han Chinese patient-sibling family-based cohorts	Jiang S	Transl Psychiatry	2020	3	0.8	-1
32203205	The intronic BRCA1 c.5407-25T>A variant causing partly skipping of exon 23-a likely pathogenic variant with reduced penetrance?	Høberg-Vetti H	Eur J Hum Genet	2020	4	1	-1
31836692	Clinical and Molecular Prevalence of Lipodystrophy in an Unascertained Large Clinical Care Cohort	Gonzaga-Jauregui C	Diabetes	2020	26	6.5	0	Not coding variant associations
32386559	Familial Hypocalciuric Hypercalcemia Type 1 and Autosomal-Dominant Hypocalcemia Type 1: Prevalence in a Large Healthcare Population	Dershem R	Am J Hum Genet	2020	26	6.5	0	Method or review paper
32183904	Gene family information facilitates variant interpretation and identification of disease-associated genes in neurodevelopmental disorders	Lal D	Genome Med	2020	26	6.5	2	Not gene-level associations
32305265	The black sheep of the family- whole-exome sequencing in family of lithium response discordant bipolar monozygotic twins	Jacobs A	Eur Neuropsychopharmacol	2020	3	0.8	-1
32287273	DOT: Gene-set analysis by combining decorrelated association statistics	Vsevolozhskaya OA	PLoS Comput Biol	2020	4	1	-1
32637632	Synonymous variants associated with Alzheimer disease in multiplex families	Tang M	Neurol Genet	2020	4	1	-1
32912094	Exome Array Analysis of Early-Onset Ischemic Stroke	Jaworek T	Stroke	2020	4	1	-1
32573853	Parkinson's Disease, NOTCH3 Genetic Variants, and White Matter Hyperintensities	Ramirez J	Mov Disord	2020	9	2.2	-1
32749716	Natural history of multiple sulfatase deficiency: Retrospective phenotyping and functional variant analysis to characterize an ultra-rare disease	Adang LA	J Inherit Metab Dis	2020	9	2.2	-1
32917212	A case of Myhre syndrome mimicking juvenile scleroderma	Jensen B	Pediatr Rheumatol Online J	2020	4	1	-1
33115620	Non-invasive prenatal testing for management of haemolytic disease of the fetus and newborn induced by maternal alloimmunisation	Hyland CA	Transfus Apher Sci	2020	4	1	-1
31664505	NF1 patient missense variants predict a role for ATM in modifying neurofibroma initiation	Yu Y	Acta Neuropathol	2020	5	1.2	-1
32689980	Stauffer syndrome, clinical implications and knowledge gaps, does size matter? Case report	Chavarriaga J	BMC Urol	2020	5	1.2	-1
32295625	Tumor sequencing is useful to refine the analysis of germline variants in unexplained high-risk breast cancer families	Van Marcke C	Breast Cancer Res	2020	5	1.2	-1
32173566	Role of mitochondrial DNA variants in the development of fragile X-associated tremor/ataxia syndrome	Alvarez-Mora MI	Mitochondrion	2020	4	1	-1
32156722	Li-Fraumeni Exploration Consortium Data Coordinating Center: Building an Interactive Web-Based Resource for Collaborative International Cancer Epidemiology Research for a Rare Condition	Mai PL	Cancer Epidemiol Biomarkers Prev	2020	5	1.2	-1
32960507	Identification of novel candidate risk genes for myelomeningocele within the glucose homeostasis/oxidative stress and folate/one-carbon metabolism networks	Hillman P	Mol Genet Genomic Med	2020	5	1.2	-1
32883051	Assessing Lysosomal Disorders in the NGS Era: Identification of Novel Rare Variants	Encarnação M	Int J Mol Sci	2020	5	1.2	-1
32529295	New DPYD variants causing DPD deficiency in patients treated with fluoropyrimidine	García-González X	Cancer Chemother Pharmacol	2020	5	1.2	-1
33161844	Cysteine-Altering NOTCH3 Variants Are a Risk Factor for Stroke in the Elderly Population	Hack RJ	Stroke	2020	15	3.8	2	Not gene-level associations
32321919	A high definition picture of somatic mutations in chronic lymphoproliferative disorder of natural killer cells	Gasparini VR	Blood Cancer J	2020	15	3.8	2	Not gene-level associations
33186364	Genetic loci associated with prevalent and incident myocardial infarction and coronary heart disease in the Cohorts for Heart and Aging Research in Genomic Epidemiology (CHARGE) Consortium	Hahn J	PLoS One	2020	5	1.2	-1
31980564	Higher burden of rare frameshift indels in genes related to synaptic transmission separate familial hemiplegic migraine from common types of migraine	Rasmussen AH	J Med Genet	2020	5	1.2	-1
32278351	The mutational burden and oligogenic inheritance in Klippel-Feil syndrome	Li Z	BMC Musculoskelet Disord	2020	5	1.2	-1
33315984	Predictors of immunotherapy benefit in Merkel cell carcinoma	Kacew AJ	Oncotarget	2020	5	1.2	-1
33006084	Genetic Determinants of Childhood Obesity	Littleton SH	Mol Diagn Ther	2020	16	4	2	Method or review paper
31970404	Germline cancer predisposition variants and pediatric glioma: a population-based study in California	Muskens IS	Neuro Oncol	2020	15	3.8	1
31996268	Analysis of neurodegenerative disease-causing genes in dementia with Lewy bodies	Orme T	Acta Neuropathol Commun	2020	16	4	2	Not gene-level associations
33262201	First results of the EORTC-SPECTA/Arcagen study exploring the genomics of rare cancers in collaboration with the European reference network EURACAN	Morfouace M	ESMO Open	2020	8	2	-1
32291395	DICER1-associated central nervous system sarcoma in children: comprehensive clinicopathologic and genetic analysis of a newly described rare tumor	Kamihara J	Mod Pathol	2020	15	3.8	2	Not coding variant associations
32866655	Inherited Rare, Deleterious Variants in ATM Increase Lung Adenocarcinoma Risk	Esai Selvan M	J Thorac Oncol	2020	15	3.8	1
32094344	Contribution of common and rare variants to bipolar disorder susceptibility in extended pedigrees from population isolates	Sul JH	Transl Psychiatry	2020	10	2.5	2	Not gene-level associations
31494579	Enrichment of damaging missense variants in genes related with axonal guidance signalling in sporadic Meniere's disease	Gallego-Martinez A	J Med Genet	2020	10	2.5	3	Can't access
32822252	Genetic Determinants of Electrocardiographic P-Wave Duration and Relation to Atrial Fibrillation	Weng LC	Circ Genom Precis Med	2020	10	2.5	2	Annotations not specified
32507414	Mutation screening and burden analysis of VPS13C in Chinese patients with early-onset Parkinson's disease	Gu X	Neurobiol Aging	2020	10	2.5	3	Can't access
32859249	Systems genetics analysis identifies calcium-signaling defects as novel cause of congenital heart disease	Izarzugaza JMG	Genome Med	2020	9	2.2	-1
32128068	Identification of rare variants in novel candidate genes in pulmonary atresia patients by next generation sequencing	Shi X	Comput Struct Biotechnol J	2020	9	2.2	-1
32623306	GBA variation and susceptibility to multiple system atrophy	Wernick AI	Parkinsonism Relat Disord	2020	9	2.2	-1
32223758	Sensitivity to gene dosage and gene expression affects genes with copy number variants observed among neuropsychiatric diseases	Yamasaki M	BMC Med Genomics	2020	9	2.2	-1
32942984	Functional characterization of rare NRXN1 variants identified in autism spectrum disorders and schizophrenia	Ishizuka K	J Neurodev Disord	2020	10	2.5	2	Not gene-level associations
32296054	Increased burden of ultra-rare structural variants localizing to boundaries of topologically associated domains in schizophrenia	Halvorsen M	Nat Commun	2020	29	7.2	2	Not gene-level associations
33150406	KMT2B-related disorders: expansion of the phenotypic spectrum and long-term efficacy of deep brain stimulation	Cif L	Brain	2020	30	7.5	0	Not coding variant associations
31937769	Rare copy number variants in over 100,000 European ancestry subjects reveal multiple disease associations	Li YR	Nat Commun	2020	30	7.5	0	Copy number variants
32010961	Germline variant burden in multidrug resistance transporters is a therapy-specific predictor of survival in breast cancer patients	Xiao Q	Int J Cancer	2020	9	2.2	-1
32864785	Efficient gene-environment interaction tests for large biobank-scale sequencing studies	Wang X	Genet Epidemiol	2020	9	2.2	-1
32764209	Host Genetic and Gut Microbial Signatures in Familial Inflammatory Bowel Disease	Park YM	Clin Transl Gastroenterol	2020	3	0.8	-1
36046264	Colorectal cancer genomic biomarkers in the clinical management of patients with metastatic colorectal carcinoma	Rachiglio AM	Explor Target Antitumor Ther	2020	3	0.8	-1
32421892	Germline loss-of-function variants in MBD4 are rare in Finnish patients with uveal melanoma	Repo P	Pigment Cell Melanoma Res	2020	3	0.8	-1
32054687	Excess of singleton loss-of-function variants in Parkinson's disease contributes to genetic risk	Bobbili DR	J Med Genet	2020	3	0.8	-1
33008515	The genetics of migraine and the path to precision medicine	Cader MZ	Prog Brain Res	2020	3	0.8	-1
32042909	Analysis of common and rare VPS13C variants in late-onset Parkinson disease	Rudakou U	Neurol Genet	2020	8	2	-1
33752217	Variants in ACE2 and TMPRSS2 Genes Are Not Major Determinants of COVID-19 Severity in UK Biobank Subjects	Curtis D	Hum Hered	2020	8	2	-1
33083721	Exome Sequencing Implicates Impaired GABA Signaling and Neuronal Ion Transport in Trigeminal Neuralgia	Dong W	iScience	2020	8	2	-1
33081265	Genetics and Genomics of Pediatric Pulmonary Arterial Hypertension	Welch CL	Genes (Basel)	2020	16	4	0	Method or review paper
32117412	Novel and Known Gene-Smoking Interactions With cIMT Identified as Potential Drivers for Atherosclerosis Risk in West-African Populations of the AWI-Gen Study	Boua PR	Front Genet	2020	6	1.5	-1
33412546	Multiple Linear Regression Allows Weighted Burden Analysis of Rare Coding Variants in an Ethnically Heterogeneous Population	Curtis D	Hum Hered	2020	5	1.2	-1
31806158	No genetic evidence for involvement of alcohol dehydrogenase genes in risk for Parkinson's disease	Kim JJ	Neurobiol Aging	2020	6	1.5	-1
32938993	Neurological disorder-associated genetic variants in individuals with psychogenic nonepileptic seizures	Leu C	Sci Rep	2020	8	2	-1
32276107	Case-control association study of rare nonsynonymous variants of SCN1A and KCNQ2 in acute encephalopathy with biphasic seizures and late reduced diffusion	Shibata A	J Neurol Sci	2020	8	2	-1
32640185	Characterization of Exome Variants and Their Metabolic Impact in 6,716 American Indians from the Southwest US	Kim HI	Am J Hum Genet	2020	9	2.2	-1
32748548	Rare deleterious variants of NOTCH1, GATA4, SMAD6, and ROBO4 are enriched in BAV with early onset complications but not in BAV with heritable thoracic aortic disease	Musfee FI	Mol Genet Genomic Med	2020	8	2	-1
32412588	Whole exome sequencing in patients with Williams-Beuren syndrome followed by disease modeling in mice points to four novel pathways that may modify stenosis risk	Parrish PCR	Hum Mol Genet	2020	6	1.5	-1
33002040	Meta-analysis of whole-exome sequencing data from two independent cohorts finds no evidence for rare variant enrichment in Parkinson disease associated loci	Gaare JJ	PLoS One	2020	6	1.5	-1
32076896	Familial analysis reveals rare risk variants for migraine in regulatory regions	Techlo TR	Neurogenetics	2020	7	1.8	-1
32471518	Ancestry-specific predisposing germline variants in cancer	Oak N	Genome Med	2020	22	5.5	0	Method or review paper
32866294	Drivers underpinning the malignant transformation of giant cell tumour of bone	Fittall MW	J Pathol	2020	11	2.8	0	Method or review paper
34396283	Machine Learning Identifies Clinical and Genetic Factors Associated With Anthracycline Cardiotoxicity in Pediatric Cancer Survivors	Chaix MA	JACC CardioOncol	2020	11	2.8	0	Not coding variant associations
33187088	Whole Exome Sequence Analysis Provides Novel Insights into the Genetic Framework of Childhood-Onset Pulmonary Arterial Hypertension	Gelinas SM	Genes (Basel)	2020	10	2.5	2	Not gene-level associations
33369641	Rare and Common Genetic Variants, Smoking, and Body Mass Index: Progression and Earlier Age of Developing Advanced Age-Related Macular Degeneration	Seddon JM	Invest Ophthalmol Vis Sci	2020	11	2.8	2	Not gene-level associations
33110418	Genes and Pathways Implicated in Tetralogy of Fallot Revealed by Ultra-Rare Variant Burden Analysis in 231 Genome Sequences	Manshaei R	Front Genet	2020	15	3.8	1
32658072	Medullary Pancreatic Carcinoma Due to Somatic POLE Mutation: A Distinctive Pancreatic Carcinoma With Marked Long-Term Survival	Kryklyva V	Pancreas	2020	11	2.8	2	Not coding variant associations
31485028	Copy number variants in lipid metabolism genes are associated with gallstones disease in men	Pérez-Palma E	Eur J Hum Genet	2020	2	0.5	-1
32576543	Safety margins for dermatofibrosarcoma protuberans: a comparison between wide local excision and Mohs Tubingen technique	Cammarata E	Eur J Dermatol	2020	2	0.5	-1
31821707	May-Thurner syndrome: History of understanding and need for defining population prevalence	Harbin MM	J Thromb Haemost	2020	31	7.8	0	Method or review paper
32130795	Delineation of musculocontractural Ehlers-Danlos Syndrome caused by dermatan sulfate epimerase deficiency	Lautrup CK	Mol Genet Genomic Med	2020	11	2.8	0	Not coding variant associations
32317181	Pan-cancer Analysis of CDK12 Alterations Identifies a Subset of Prostate Cancers with Distinct Genomic and Clinical Characteristics	Nguyen B	Eur Urol	2020	37	9.2	0	Not coding variant associations
31520493	Combining sequence data from multiple studies: Impact of analysis strategies on rare variant calling and association results	Chen Z	Genet Epidemiol	2020	2	0.5	-1
33090489	Polygenic risk heterogeneity among focal epilepsies	Gramm M	Epilepsia	2020	2	0.5	-1
32246154	Family-based exome sequencing identifies rare coding variants in age-related macular degeneration	Ratnapriya R	Hum Mol Genet	2020	15	3.8	1
32033911	The Undiagnosed Diseases Network International: Five years and more!	Taruscio D	Mol Genet Metab	2020	10	2.5	0	Method or review paper
32939436	Novel Mutations and Genes That Impact on Growth in Short Stature of Undefined Aetiology: The EPIGROW Study	Perchard R	J Endocr Soc	2020	3	0.8	-1
32926241	Should We Use Genetic Scores in the Determination of Treatment Strategies to Control Dyslipidemias?	Lechner K	Curr Cardiol Rep	2020	3	0.8	-1
31724192	Impact of natural neuromedin-B receptor variants on iron metabolism	Rametta R	Am J Hematol	2020	3	0.8	-1
31060816	Rare, low-frequency and common coding variants of ARHGEF28 gene and their association with sporadic amyotrophic lateral sclerosis	Song Y	Neurobiol Aging	2020	2	0.5	-1
32746945	GCH1 variants contribute to the risk and earlier age-at-onset of Parkinson's disease: a two-cohort case-control study	Pan HX	Transl Neurodegener	2020	16	4	1
32492392	Exome Sequencing Identifies Genes and Gene Sets Contributing to Severe Childhood Obesity, Linking PHIP Variants to Repressed POMC Transcription	Marenne G	Cell Metab	2020	20	5	1
33413751	POLG Mutations Are Probably Rare in the Han Chinese Population	Yang KF	Chin Med Sci J	2020	1	0.2	-1
31776129	Dramatic increase in gene mutational burden after transformation of follicular lymphoma into TdT(+) B-lymphoblastic leukemia/lymphoma	Belman JP	Cold Spring Harb Mol Case Stud	2020	1	0.2	-1
32747172	Analysis of exome-sequenced UK Biobank subjects implicates genes affecting risk of hyperlipidaemia	Curtis D	Mol Genet Metab	2020	1	0.2	-1
32572023	The role of rare compound heterozygous events in autism spectrum disorder	Lin BD	Transl Psychiatry	2020	1	0.2	-1
33240333	Multi-Set Testing Strategies Show Good Behavior When Applied to Very Large Sets of Rare Variants	Fore R	Front Genet	2020	1	0.2	-1
32349395	Gene-Wise Burden of Coding Variants Correlates to Noncoding Pharmacogenetic Risk Variants	Park J	Int J Mol Sci	2020	2	0.5	-1
33072126	Reduction of T Lymphoma Cells and Immunological Invigoration in a Patient Concurrently Affected by Melanoma and Sezary Syndrome Treated With Nivolumab	Narducci MG	Front Immunol	2020	2	0.5	-1
32967697	Medical costs of Alpha-1 antitrypsin deficiency-associated COPD in the United States	Sieluk J	Orphanet J Rare Dis	2020	2	0.5	-1
32479703	How to choose your study design	Mellis CM	J Paediatr Child Health	2020	2	0.5	-1
32700635	Gene-wise variant burden and genomic characterization of nearly every gene	Park Y	Pharmacogenomics	2020	1	0.2	-1
33012304	Genetic study of pediatric hypertrophic cardiomyopathy in Egypt	Darwish RK	Cardiol Young	2020	2	0.5	-1
31899853	Comparison of the biomarkers for targeted therapies in primary extra-mammary and mammary Paget's disease	Gatalica Z	Cancer Med	2020	11	2.8	0	Not coding variant associations
32741968	Assessing non-Mendelian inheritance in inherited axonopathies	Bis-Brewer DM	Genet Med	2020	10	2.5	0	Not coding variant associations
31383942	A genome-first approach to aggregating rare genetic variants in LMNA for association with electronic health record phenotypes	Park J	Genet Med	2020	25	6.2	1
32545830	Involvement of the 14-3-3 Gene Family in Autism Spectrum Disorder and Schizophrenia: Genetics, Transcriptomics and Functional Analyses	Torrico B	J Clin Med	2020	10	2.5	2	Gene-level associations were conducted with common variants, unclear strictly coding or not
32006592	Genetics and Other Omics in Pediatric Pulmonary Arterial Hypertension	Welch CL	Chest	2020	10	2.5	0	Method or review paper
32066793	Exome Sequencing in Individuals with Isolated Biliary Atresia	Rajagopalan R	Sci Rep	2020	8	2	-1
32350504	When genetic burden reaches threshold	Walsh R	Eur Heart J	2020	17	4.2	0	Method or review paper
32906206	Frequency spectrum of rare and clinically relevant markers in multiethnic Indian populations (ClinIndb): A resource for genomic medicine in India	Narang A	Hum Mutat	2020	8	2	-1
32397312	Burden of Rare Variants in ALS and Axonal Hereditary Neuropathy Genes Influence Survival in ALS: Insights from a Next Generation Sequencing Study of an Italian ALS Cohort	Scarlino S	Int J Mol Sci	2020	8	2	-1
33322084	Genome-Wide Analysis of Off-Target CRISPR/Cas9 Activity in Single-Cell-Derived Human Hematopoietic Stem and Progenitor Cell Clones	Smith RH	Genes (Basel)	2020	8	2	-1
32496628	Exome Sequencing Reveals Common and Rare Variants in F5 Associated With ACE Inhibitor and Angiotensin Receptor Blocker-Induced Angioedema	Maroteau C	Clin Pharmacol Ther	2020	6	1.5	-1
32693407	Novel manifestations of immune dysregulation and granule defects in gray platelet syndrome	Sims MC	Blood	2020	21	5.2	0	Not coding variant associations
32677286	Evaluating the Role of SNCA, LRRK2, and GBA in Chinese Patients With Early-Onset Parkinson's Disease	Chen Y	Mov Disord	2020	18	4.5	3	Can't access
32714265	Recurrent Fulminant Tumefactive Demyelination With Marburg-Like Features and Atypical Presentation: Therapeutic Dilemmas and Review of Literature	Vakrakou AG	Front Neurol	2020	8	2	-1
31914052	Head and neck verrucous carcinoma: A population-based analysis of incidence, treatment, and prognosis	Wang N	Medicine (Baltimore)	2020	8	2	-1
31799744	A unified method for rare variant analysis of gene-environment interactions	Lim E	Stat Med	2020	6	1.5	-1
32890272	Genetics of renovascular hypertension in children	Viering DHHM	J Hypertens	2020	6	1.5	-1
32381728	Exome sequencing analysis identifies frequent oligogenic involvement and FLNB variants in adolescent idiopathic scoliosis	Jiang H	J Med Genet	2020	6	1.5	-1
33302605	Hereditary Hypertrophic Cardiomyopathy in Children and Young Adults-The Value of Reevaluating and Expanding Gene Panel Analyses	Fernlund E	Genes (Basel)	2020	6	1.5	-1
33105179	Impetigo	Johnson MK	Adv Emerg Nurs J	2020	7	1.8	-1
33226994	A phenome-wide association study of 26 mendelian genes reveals phenotypic expressivity of common and rare variants within the general population	Tcheandjieu C	PLoS Genet	2020	7	1.8	-1
31788832	Identification of Restless Legs Syndrome Genes by Mutational Load Analysis	Tilch E	Ann Neurol	2020	7	1.8	-1
32233023	Wolff-Parkinson-White syndrome: De novo variants and evidence for mutational burden in genes associated with atrial fibrillation	Coban-Akdemir ZH	Am J Med Genet A	2020	7	1.8	-1
32371106	Variants in the Niemann-Pick type C gene NPC1 are not associated with Parkinson's disease	Ouled Amar Bencheikh B	Neurobiol Aging	2020	7	1.8	-1
32662538	Mutation Analysis of DNAJC Family for Early-Onset Parkinson's Disease in a Chinese Cohort	Li C	Mov Disord	2020	7	1.8	-1
32956375	Candidate variants in TUB are associated with familial tremor	Sailani MR	PLoS Genet	2020	0	0	-1
32253937	A novel mutation in TARDBP segregates with amyotrophic lateral sclerosis in a large family with early onset and fast progression	Goldstein O	Amyotroph Lateral Scler Frontotemporal Degener	2020	0	0	-1
31825275	Successful treatment of a patient with multicolored nevus of Ota using a combination of 1064 and 532 nm Q-switched Nd:YAG lasers	Mahmoudi H	J Cosmet Laser Ther	2020	0	0	-1
33362267	Novel CRISPR-based sequence specific enrichment methods for target loci and single base mutations	Steele JL	PLoS One	2020	0	0	-1
32655614	Maximal Segmental Score Method for Localizing Recessive Disease Variants Based on Sequence Data	Hsieh AR	Front Genet	2020	0	0	-1
32161841	Genetic Burden Contributing to Extremely Low or High Bone Mineral Density in a Senior Male Population From the Osteoporotic Fractures in Men Study (MrOS)	Chen S	JBMR Plus	2020	0	0	-1
31425481	Genomic profiling of a dedifferentiated mucosal melanoma following exposure to immunotherapy	Prior L	Melanoma Res	2020	0	0	-1
32237178	Gene-based and pathway-based testing for rare-variant association in affected sib pairs	Romanescu RG	Genet Epidemiol	2020	0	0	-1
32888494	The Polygenic and Monogenic Basis of Blood Traits and Diseases	Vuckovic D	Cell	2020	229	57.2	2	Not gene-level associations
32330418	Non-coding and Loss-of-Function Coding Variants in TET2 are Associated with Multiple Neurodegenerative Diseases	Cochran JN	Am J Hum Genet	2020	36	9	1
32597523	We Have Seen the Mutants-and They Are Us: Gifts and Burdens of a Genetic Diagnosis	Kittay EF	Hastings Cent Rep	2020	0	0	-1
33261662	dbNSFP v4: a comprehensive database of transcript-specific functional predictions and annotations for human nonsynonymous and splice-site SNVs	Liu X	Genome Med	2020	171	42.8	0	Method or review paper
31903617	Genetic variants in toll-like receptor 4 are associated with lack of steroid-responsiveness in pediatric ITP patients	Kim TO	Am J Hematol	2020	0	0	-1
31642496	Gene4Denovo: an integrated database and analytic platform for de novo mutations in humans	Zhao G	Nucleic Acids Res	2020	32	8	0	Method or review paper
33166306	Identifying genetic variants associated with ritodrine-induced pulmonary edema	Lee SM	PLoS One	2020	1	0.2	-1
31941532	De novo variants in exomes of congenital heart disease patients identify risk genes and pathways	Sevim Bayrak C	Genome Med	2020	26	6.5	2	Not gene-level associations
32860726	Similar burden of pathogenic coding variants in exceptionally long-lived individuals and individuals without exceptional longevity	Gutman D	Aging Cell	2020	2	0.5	-1
32397755	Coding Variants in HOOK2 and GTPBP3 May Contribute to Risk of Primary Angle Closure Glaucoma	Qiao C	DNA Cell Biol	2020	2	0.5	-1
32552793	Analysis of transcript-deleterious variants in Mendelian disorders: implications for RNA-based diagnostics	Maddirevula S	Genome Biol	2020	28	7	2	Not gene-level associations
31464095	A rare heterozygous TREM2 coding variant identified in familial clustering of dementia affects an intrinsically disordered protein region and function of TREM2	Karsak M	Hum Mutat	2020	2	0.5	-1
32469048	Whole-exome sequencing of a large Chinese azoospermia and severe oligospermia cohort identifies novel infertility causative variants and genes	Chen S	Hum Mol Genet	2020	22	5.5	2	Not gene-level associations
31928178	A Truncating Germline Mutation of TINF2 in Individuals with Thyroid Cancer or Melanoma Results in Longer Telomeres	He H	Thyroid	2020	21	5.2	2	Not coding variant associations
33251213	Coding Variants Coupled With Rapid Modeling in Zebrafish Implicate Dynein Genes, dnaaf1 and zmynd10, as Adolescent Idiopathic Scoliosis Candidate Genes	Wang Y	Front Cell Dev Biol	2020	9	2.2	-1
32515122	Dysregulated expression of androgen metabolism genes and genetic analysis in hypospadias	Chen Z	Mol Genet Genomic Med	2020	4	1	-1
33240932	Multi-Omics Approaches to Improve Mitochondrial Disease Diagnosis: Challenges, Advances, and Perspectives	Labory J	Front Mol Biosci	2020	12	3	0	Method or review paper
31866045	UK Biobank Whole-Exome Sequence Binary Phenome Analysis with Robust Region-Based Rare-Variant Test	Zhao Z	Am J Hum Genet	2020	36	9	1
33109206	Identification of potential causal variants for premature ovarian failure by whole exome sequencing	Jin H	BMC Med Genomics	2020	11	2.8	2	Not gene-level associations
33575557	An interpretable low-complexity machine learning framework for robust exome-based in-silico diagnosis of Crohn's disease patients	Raimondi D	NAR Genom Bioinform	2020	9	2.2	-1
32533184	An Alu-mediated duplication in NMNAT1, involved in NAD biosynthesis, causes a novel syndrome, SHILCA, affecting multiple tissues and organs	Bedoni N	Hum Mol Genet	2020	9	2.2	-1
31691645	Monogenic and Polygenic Contributions to Atrial Fibrillation Risk: Results From a National Biobank	Choi SH	Circ Res	2020	39	9.8	1
34047519	Screening of somatic mutations in the JAK2 and CALR genes by high-resolution melting curve analysis	Kurochkin DV	Klin Lab Diagn	2021	0	0	-1
31771860	De Novo Damaging DNA Coding Mutations Are Associated With Obsessive-Compulsive Disorder and Overlap With Tourette's Disorder and Autism	Cappi C	Biol Psychiatry	2020	42	10.5	1
32192357	Novel Mutations and Decreased Expression of the Epigenetic Regulator TET2 in Pulmonary Arterial Hypertension	Potus F	Circulation	2020	45	11.2	1
33491648	Principles of dengue virus evolvability derived from genotype-fitness maps in human and mosquito cells	Dolan PT	Elife	2021	14	4.7	0	Not coding variant associations
32191290	Frequency of Pathogenic Germline Variants in Cancer-Susceptibility Genes in Patients With Osteosarcoma	Mirabello L	JAMA Oncol	2020	86	21.5	1
31813809	Putative Drivers of Aggressiveness in TCEB1-mutant Renal Cell Carcinoma: An Emerging Entity with Variable Clinical Course	DiNatale RG	Eur Urol Focus	2021	12	4	2	Copy number variants
33863344	Cross-oncopanel study reveals high sensitivity and accuracy with overall analytical performance depending on genomic regions	Gong B	Genome Biol	2021	12	4	0	Not coding variant associations
33795796	Family-based gene-environment interaction using sequence kernel association test (FGE-SKAT) for complex quantitative traits	Guo CY	Sci Rep	2021	0	0	-1
34219138	Functionally validated SCN5A variants allow interpretation of pathogenicity and prediction of lethal events in Brugada syndrome	Ishikawa T	Eur Heart J	2021	21	7	0	Not coding variant associations
34247168	Estimated Prevalence and Incidence of Amyotrophic Lateral Sclerosis and SOD1 and C9orf72 Genetic Variants	Brown CA	Neuroepidemiology	2021	41	13.7	2	Not coding variant associations
34312540	Recent ultra-rare inherited variants implicate new autism candidate risk genes	Wilfert AB	Nat Genet	2021	41	13.7	2	Not gene-level associations
33550997	Genetic architecture of schizophrenia: a review of major advancements	Legge SE	Psychol Med	2021	42	14	0	Method or review paper
33446828	Extension of SKAT to multi-category phenotypes through a geometrical interpretation	Bocher O	Eur J Hum Genet	2021	1	0.3	-1
34493867	Genomic and evolutionary classification of lung cancer in never smokers	Zhang T	Nat Genet	2021	47	15.7	0	Method or review paper
34461831	Aortic root aortopathy in bicuspid aortic valve associated with high genetic risk	Ma M	BMC Cardiovasc Disord	2021	0	0	-1
31983221	Reevaluating the Genetic Contribution of Monogenic Dilated Cardiomyopathy	Mazzarotto F	Circulation	2020	94	23.5	1
32753233	Adolescent Attention-Deficit/Hyperactivity Disorder: Understanding Teenage Symptom Trajectories	Shaw P	Biol Psychiatry	2021	21	7	0	Method or review paper
32501810	ACE2 and TMPRSS2 variants and expression as candidates to sex and country differences in COVID-19 severity in Italy	Asselta R	Aging (Albany NY)	2020	246	61.5	1
30108311	Whole exome sequencing study identifies novel rare and common Alzheimer's-Associated variants involved in immune response and transcriptional regulation			2020	125	62.5	1	Additional curation
32042909	Analysis of common and rare VPS13C variants in late-onset Parkinson disease			2020	9	4.5	1	Additional curation
32239153	Germline MBD4 Mutations and Predisposition to Uveal Melanoma	Derrien AC	J Natl Cancer Inst	2021	27	9	2	Not coding variant associations
32640185	Characterization of Exome Variants and Their Metabolic Impact in 6,716 American Indians from the Southwest US			2020	10	5	1	Additional curation
34148545	Identification of sixteen novel candidate genes for late onset Parkinson's disease	Gialluisi A	Mol Neurodegener	2021	26	8.7	2	Not gene-level associations
34344823	Broad betacoronavirus neutralization by a stem helix-specific human antibody	Pinto D	Science	2021	175	58.3	0	Not coding variant associations
34758253	100,000 Genomes Pilot on Rare-Disease Diagnosis in Health Care - Preliminary Report	100,000 Genomes Project Pilot Investigators	N Engl J Med	2021	184	61.3	0	Method or review paper
34554790	Discovery and implications of polygenicity of common diseases	Visscher PM	Science	2021	36	12	0	Method or review paper
32970752	Burden of rare deleterious variants in WNT signaling genes among 511 myelomeningocele patients			2020	8	4	1	Additional curation
33087929	Exome sequencing and characterization of 49,960 individuals in the UK Biobank			2020	241	120.5	1	Additional curation
30449520	Genetic effects and gene-by-education interactions on episodic memory performance and decline in an aging population	Smith JA	Soc Sci Med	2021	10	3.3	0	Not coding variant associations
31338326	Exome-Wide Rare Variant Analysis From the DiscovEHR Study Identifies Novel Candidate Predisposition Genes for Endometrial Cancer	Shivakumar M	Front Oncol	2019	13	2.6	1
34615521	How rare and common risk variation jointly affect liability for autism spectrum disorder	Klei L	Mol Autism	2021	11	3.7	2	Not gene-level associations
29593342	Genetic variants and pathways implicated in a pediatric inflammatory bowel disease cohort	Shaw KA	Genes Immun	2019	14	2.8	1
31712719	Increased schizophrenia family history burden and reduced premorbid IQ in treatment-resistant schizophrenia: a Swedish National Register and Genomic Study	Kowalec K	Mol Psychiatry	2021	11	3.7	2	Not gene-level associations
30314816	Common and rare GCH1 variants are associated with Parkinson's disease	Rudakou U	Neurobiol Aging	2019	15	3	1
33876560	FGL1 as a modulator of plasma D-dimer levels: Exome-wide marker analysis of plasma tPA, PAI-1, and D-dimer	Thibord F	J Thromb Haemost	2021	1	0.3	-1
34266329	Programmed Death Ligand 1 Expression and Related Markers in Pleuropulmonary Blastoma	Alipour Z	Pediatr Dev Pathol	2021	1	0.3	-1
34733315	Comprehensive Analysis of LIN28A in Chinese Patients With Early Onset Parkinson's Disease	Gu X	Front Genet	2021	1	0.3	-1
33226711	Mutation analysis of MFSD8 in an amyotrophic lateral sclerosis cohort from mainland China	Huang L	Eur J Neurosci	2021	1	0.3	-1
34460807	May-Thurner Syndrome: A Rare Case of Unilateral Deep Vein Thrombosis in an Elderly Woman	Siddiqa A	Am J Case Rep	2021	1	0.3	-1
33789365	[Association between rare UBQLN2 variants and amyotrophic lateral sclerosis in Chinese population]	Chen JY	Zhonghua Yi Xue Za Zhi	2021	0	0	-1
33423827	The burden of rare damaging variants in hereditary atypical parkinsonism genes is increased in patients with Parkinson's disease	Kim YJ	Neurobiol Aging	2021	1	0.3	-1
34266320	Increased burden of rare variants in genes of the endosomal Toll-like receptor pathway in patients with systemic lupus erythematosus	Lea-Henry TN	Lupus	2021	1	0.3	-1
33476483	An increased burden of rare exonic variants in NRXN1 microdeletion carriers is likely to enhance the penetrance for autism spectrum disorder	Cameli C	J Cell Mol Med	2021	1	0.3	-1
30425093	Rare, Pathogenic Germline Variants in Fanconi Anemia Genes Increase Risk for Squamous Lung Cancer	Esai Selvan M	Clin Cancer Res	2019	15	3	1
34615865	Calibrated rare variant genetic risk scores for complex disease prediction using large exome sequence repositories	Lali R	Nat Commun	2021	14	4.7	0	Method or review paper
31700678	Targeted resequencing identifies genes with recurrent variation in cerebral palsy	van Eyk CL	NPJ Genom Med	2019	15	3	1
34455394	Identification of a wide spectrum of ciliary gene mutations in nonsyndromic biliary atresia patients implicates ciliary dysfunction as a novel disease mechanism	Lam WY	EBioMedicine	2021	18	6	0	Not coding variant associations
31890855	Estrogen activates Alzheimer's disease genes	Ratnakumar A	Alzheimers Dement (N Y)	2019	15	3	1
32719466	Genetic copy number variants, cognition and psychosis: a meta-analysis and a family study	Thygesen JH	Mol Psychiatry	2021	11	3.7	0	Copy number variants
33598926	FARS1-related disorders caused by bi-allelic mutations in cytosolic phenylalanyl-tRNA synthetase genes: Look beyond the lungs!	Schuch LA	Clin Genet	2021	10	3.3	2	Not coding variant associations
34379075	Genomic Autopsy of Sudden Deaths in Young Individuals	Webster G	JAMA Cardiol	2021	10	3.3	0	Not coding variant associations
34952640	IDH-wild type glioblastomas featuring at least 30% giant cells are characterized by frequent RB1 and NF1 alterations and hypermutation	Barresi V	Acta Neuropathol Commun	2021	8	2.7	0	Not coding variant associations
33576071	What evolutionary processes maintain MHC IIꞵ diversity within and among populations of stickleback?	Peng F	Mol Ecol	2021	8	2.7	0	Not coding variant associations
33279243	Mutation analysis of TMEM family members for early-onset Parkinson's disease in Chinese population	Li C	Neurobiol Aging	2021	8	2.7	3	Can't access
34227748	Recurrent seizure-related GRIN1 variant: Molecular mechanism and targeted therapy	Xu Y	Ann Clin Transl Neurol	2021	10	3.3	2	Not gene-level associations
33480994	Maintenance of Adaptive Dynamics and No Detectable Load in a Range-Edge Outcrossing Plant Population	Takou M	Mol Biol Evol	2021	10	3.3	0	Not coding variant associations
34247193	Clinicopathological and genomic features in patients with head and neck neuroendocrine carcinoma	Ohmoto A	Mod Pathol	2021	10	3.3	0	Method or review paper
32641753	Novel candidate genes in esophageal atresia/tracheoesophageal fistula identified by exome sequencing	Wang J	Eur J Hum Genet	2021	9	3	2	Not gene-level associations
33325730	Genetic Association Between Hypoplastic Left Heart Syndrome and Cardiomyopathies	Theis JL	Circ Genom Precis Med	2021	16	5.3	0	Not coding variant associations
30415495	Whole exome sequencing identifies novel predisposing genes in neural tube defects	Lemay P	Mol Genet Genomic Med	2019	15	3	1
33473164	Natural history, response to systemic therapy, and genomic landscape of plasmacytoid urothelial carcinoma	Teo MY	Br J Cancer	2021	9	3	0	Method or review paper
34112225	Val50Met hereditary transthyretin amyloidosis: not just a medical problem, but a psychosocial burden	González-Moreno J	Orphanet J Rare Dis	2021	7	2.3	-1
31917901	Genes that drive the pathobiology of pediatric pulmonary arterial hypertension	Welch CL	Pediatr Pulmonol	2021	7	2.3	-1
33756103	Novel ultra-rare exonic variants identified in a founder population implicate cadherins in schizophrenia	Lencz T	Neuron	2021	8	2.7	2	Not gene-level associations
30547231	A novel rare CUBN variant and three additional genes identified in Europeans with and without diabetes: results from an exome-wide association study of albuminuria	Ahluwalia TS	Diabetologia	2019	16	3.2	1
33249669	A Meta-Analysis of the Transferability of Bone Mineral Density Genetic Loci Associations From European to African Ancestry Populations	Yau MS	J Bone Miner Res	2021	7	2.3	-1
34992632	Genetic Diagnosis Spectrum and Multigenic Burden of Exome-Level Rare Variants in a Childhood Epilepsy Cohort	Yao R	Front Genet	2021	1	0.3	-1
35929646	Spectrum of Germline Mutations Within Fanconi Anemia-Associated Genes Across Populations of Varying Ancestry	Chan SH	JNCI Cancer Spectr	2021	2	0.7	-1
34681001	An Investigation of the Role of Common and Rare Variants in a Large Italian Multiplex Family of Multiple Sclerosis Patients	Barizzone N	Genes (Basel)	2021	2	0.7	-1
32989887	Whole exome sequencing identified a novel missense alteration in CC2D2A causing Joubert syndrome 9 in a Pakhtun family	Khan MI	J Gene Med	2021	2	0.7	-1
34404235	Rare NOTCH3 Variants in a Chinese Population-Based Cohort and Its Relationship With Cerebral Small Vessel Disease	Liu JY	Stroke	2021	1	0.3	-1
33574475	Human myelomeningocele risk and ultra-rare deleterious variants in genes associated with cilium, WNT-signaling, ECM, cytoskeleton and cell migration	Au KS	Sci Rep	2021	1	0.3	-1
33777822	Medullary Thyroid Cancer Patient's Assessment of Quality of Life Tools: Results from the QaLM Study	Moss L	Eur Thyroid J	2021	1	0.3	-1
32277476	A Bayes factor approach with informative prior for rare genetic variant analysis from next generation sequencing data	Xu J	Biometrics	2021	2	0.7	-1
33919687	Genetic Analysis Reveals Rare Variants in T-Cell Response Gene MR1 Associated with Poor Overall Survival after Urothelial Cancer Diagnosis	Bang L	Cancers (Basel)	2021	0	0	-1
33969541	Targeted resequencing showing novel common and rare genetic variants increases the risk of asthma in the Chinese Han population	Liu J	J Clin Lab Anal	2021	1	0.3	-1
34464028	Novel genetic characteristics in low-grade fetal adenocarcinoma of the lung	Zhang S	Thorac Cancer	2021	1	0.3	-1
33745150	Genome-wide association study of stage III/IV grade C periodontitis (former aggressive periodontitis) in a Spanish population	de Coo A	J Clin Periodontol	2021	7	2.3	-1
33107653	Shared Genetics of Multiple System Atrophy and Inflammatory Bowel Disease	Shadrin AA	Mov Disord	2021	7	2.3	-1
33827635	Psychosocial burden and professional and social support in patients with hereditary transthyretin amyloidosis (ATTRv) and their relatives in Italy	Magliano L	Orphanet J Rare Dis	2021	7	2.3	-1
33686259	Genome-wide investigation identifies a rare copy-number variant burden associated with human spina bifida	Wolujewicz P	Genet Med	2021	7	2.3	-1
33535453	Molecular Profiling of Merkel Cell Polyomavirus-Associated Merkel Cell Carcinoma and Cutaneous Melanoma	Mokánszki A	Diagnostics (Basel)	2021	7	2.3	-1
33723766	Genetic Analysis of ZNF Protein Family Members for Early-Onset Parkinson's Disease in Chinese Population	Li CY	Mol Neurobiol	2021	7	2.3	-1
33548076	Whole genome sequencing identifies novel genetic mutations in patients with eczema herpeticum	Bin L	Allergy	2021	7	2.3	-1
31217188	Germline mutations in the transcription factor IKZF5 cause thrombocytopenia	Lentaigne C	Blood	2019	17	3.4	1
30828346	Excess of Rare Missense Variants in Hearing Loss Genes in Sporadic Meniere Disease	Gallego-Martinez A	Front Genet	2019	18	3.6	1
33219486	Genetic Analysis of Prosaposin, the Lysosomal Storage Disorder Gene in Parkinson's Disease	Chen YP	Mol Neurobiol	2021	7	2.3	-1
34285202	Contextualizing genetic risk score for disease screening and rare variant discovery	Zhou D	Nat Commun	2021	7	2.3	-1
33226272	Amino Acid-Level Signal-to-Noise Analysis Aids in Pathogenicity Prediction of Incidentally Identified TTN-Encoded Titin Truncating Variants	Connell PS	Circ Genom Precis Med	2021	6	2	-1
34722352	Analysis of 200,000 Exome-Sequenced UK Biobank Subjects Implicates Genes Involved in Increased and Decreased Risk of Hypertension	Curtis D	Pulse (Basel)	2021	6	2	-1
34376007	The Genetics of Uveal Melanoma: Overview and Clinical Relevance	Riechardt AI	Klin Monbl Augenheilkd	2021	6	2	-1
33887960	Identifying the Lipidomic Effects of a Rare Loss-of-Function Deletion in ANGPTL3	Blackburn NB	Circ Genom Precis Med	2021	2	0.7	-1
33942996	Genetic heterogeneity of disorders with overgrowth and intellectual disability: Experience from a center in North India	Moirangthem A	Am J Med Genet A	2021	2	0.7	-1
34063999	Expression of Immuno-Oncologic Biomarkers Is Enriched in Colorectal Cancers and Other Solid Tumors Harboring the A59T Variant of KRAS	Lou E	Cells	2021	2	0.7	-1
33838489	Solid variant of papillary thyroid carcinoma: An analysis of 28 cases with current literature	Vural Ç	Ann Diagn Pathol	2021	2	0.7	-1
33751038	Sequencing at lymphoid neoplasm susceptibility loci maps six myeloma risk genes	Waller RG	Hum Mol Genet	2021	2	0.7	-1
34790491	A Diagnostic Dilemma: Catastrophic or Seronegative Antiphospholipid Syndrome	Enescu CD	Cureus	2021	0	0	-1
34530736	Genetic counseling as preventive intervention: toward individual specification of transgenerational autism risk	Marrus N	J Neurodev Disord	2021	1	0.3	-1
34577784	Gene Expression Analysis in Patients with Cocaine-Induced Midline Destructive Lesions	Trimarchi M	Medicina (Kaunas)	2021	1	0.3	-1
34442412	Tumour Genome Characterization of a Rare Case of Pulmonary Enteric Adenocarcinoma and Prior Colon Adenocarcinoma	Smyth RJ	J Pers Med	2021	1	0.3	-1
32732227	Data-driven modelling of mutational hotspots and in silico predictors in hypertrophic cardiomyopathy	Waring A	J Med Genet	2021	1	0.3	-1
33548880	Contribution of coding/non-coding variants in NUS1 to late-onset sporadic Parkinson's disease	Jiang L	Parkinsonism Relat Disord	2021	1	0.3	-1
33333475	Analysis of 50,000 exome-sequenced UK Biobank subjects fails to identify genes influencing probability of developing a mood disorder resulting in psychiatric referral	Curtis D	J Affect Disord	2021	2	0.7	-1
33185019	Rare variant analysis of essential tremor-associated genes in early-onset Parkinson's disease	Liang D	Ann Clin Transl Neurol	2021	2	0.7	-1
33604704	Translating genetic association of lipid levels for biological and clinical application	Crone B	Cardiovasc Drugs Ther	2021	2	0.7	-1
34005834	Genetic pleiotropy of ERCC6 loss-of-function and deleterious missense variants links retinal dystrophy, arrhythmia, and immunodeficiency in diverse ancestries	Forrest IS	Hum Mutat	2021	2	0.7	-1
34419804	Genetic analysis of TRIM family genes for early-onset Parkinson's disease in Chinese population	Li C	Parkinsonism Relat Disord	2021	2	0.7	-1
34589056	Whole Exome Sequencing Uncovered the Genetic Architecture of Growth Hormone Deficiency Patients	Yu C	Front Endocrinol (Lausanne)	2021	3	1	-1
34004033	Extending the allelic spectrum at noncoding risk loci of orofacial clefting	Thieme F	Hum Mutat	2021	2	0.7	-1
34235080	How to Better Understand the Influence of Host Genetics on Developing an Effective Immune Response to Thoracic Cancers	Behrouzfar K	Front Oncol	2021	2	0.7	-1
34773992	Pleiotropy between language impairment and broader behavioral disorders-an investigation of both common and rare genetic variants	Nudel R	J Neurodev Disord	2021	2	0.7	-1
33309333	Replication assessment of NUS1 variants in Parkinson's disease	Bustos BI	Neurobiol Aging	2021	2	0.7	-1
34034819	Impact of rare and common genetic variation in the interleukin-1 pathway on human cytokine responses	van Deuren RC	Genome Med	2021	2	0.7	-1
34718237	Exome-Wide Pan-Cancer Analysis of Germline Variants in 8,719 Individuals Finds Little Evidence of Rare Variant Associations	Guan Z	Hum Hered	2021	1	0.3	-1
32740907	Community-based genetic study of Parkinson's disease in Estonia	Muldmaa M	Acta Neurol Scand	2021	1	0.3	-1
33837242	Genomic landscape of extraordinary responses in metastatic breast cancer	Lim SM	Commun Biol	2021	2	0.7	-1
34867278	The Association Between Lysosomal Storage Disorder Genes and Parkinson's Disease: A Large Cohort Study in Chinese Mainland Population	Zhao YW	Front Aging Neurosci	2021	6	2	-1
33745059	Genome-first approach to rare EYA4 variants and cardio-auditory phenotypes in adults	Ahmadmehrabi S	Hum Genet	2021	6	2	-1
34099068	Mitochondrial genome copy number measured by DNA sequencing in human blood is strongly associated with metabolic traits via cell-type composition differences	Ganel L	Hum Genomics	2021	6	2	-1
33279834	Exome-wide rare variant analysis in familial essential tremor	Diez-Fairen M	Parkinsonism Relat Disord	2021	6	2	-1
33982075	Genetics of atrial fibrillation-practical applications for clinical management: if not now, when and how?	Kany S	Cardiovasc Res	2021	6	2	-1
34269512	Frequency of carriers for rare recessive Mendelian diseases in a Brazilian cohort of 320 patients	Quaio CRDC	Am J Med Genet C Semin Med Genet	2021	6	2	-1
34336942	Contribution of Congenital Heart Disorders Associated With Copy Number Variants in Mediating Risk for Brain Developmental Disorders: Evidence From 20-Year Retrospective Cohort Study	Dowden L	Front Cardiovasc Med	2021	6	2	-1
33016799	Essential role of autophagy in restricting poliovirus infection revealed by identification of an ATG7 defect in a poliomyelitis patient	Brinck Andersen NS	Autophagy	2021	7	2.3	-1
33535055	Rare variant burden analysis within enhancers identifies CAV1 as an ALS risk gene	Cooper-Knock J	Cell Rep	2021	6	2	-1
33804025	Set-Based Rare Variant Expression Quantitative Trait Loci in Blood and Brain from Alzheimer Disease Study Participants	Patel D	Genes (Basel)	2021	6	2	-1
33800889	Distinct Signatures of Genomic Copy Number Variants Define Subgroups of Merkel Cell Carcinoma Tumors	Hill NT	Cancers (Basel)	2021	5	1.7	-1
34480478	Targeted whole exome sequencing and Drosophila modelling to unveil the molecular basis of primary ovarian insufficiency	Bestetti I	Hum Reprod	2021	5	1.7	-1
33248804	Lack of evidence for association of UQCRC1 with Parkinson's disease in Europeans	Senkevich K	Neurobiol Aging	2021	5	1.7	-1
34516618	Expanding the genetic spectrum of TUBB1-related thrombocytopenia	Palma-Barqueros V	Blood Adv	2021	5	1.7	-1
34928949	Domestication reshaped the genetic basis of inbreeding depression in a maize landrace compared to its wild relative, teosinte	Samayoa LF	PLoS Genet	2021	5	1.7	-1
34333030	RBM20 Is a Candidate Gene for Hypertrophic Cardiomyopathy	Dai J	Can J Cardiol	2021	5	1.7	-1
34113005	Rare variants in KDR, encoding VEGF Receptor 2, are associated with tetralogy of Fallot	Škorić-Milosavljević D	Genet Med	2021	5	1.7	-1
33556167	von Willebrand factor antigen levels are associated with burden of rare nonsynonymous variants in the VWF gene	Sadler B	Blood	2021	5	1.7	-1
32973362	A human Myogenin promoter modified to be highly active in alveolar rhabdomyosarcoma drives an effective suicide gene therapy	Pruller J	Cancer Gene Ther	2021	2	0.7	-1
34233860	Validation of the pathogenic role of rare DNAJC7 variants in Chinese patients with amyotrophic lateral sclerosis	He J	Neurobiol Aging	2021	3	1	-1
33189033	Identification of vital genes and pathways associated with mucosal melanoma in Chinese	Du M	Ann Diagn Pathol	2021	0	0	-1
33502714	Rare cause of xanthinuria: a pediatric case of molybdenum cofactor deficiency B	Lee EJ	CEN Case Rep	2021	3	1	-1
33407644	Rare and low frequency genomic variants impacting neuronal functions modify the Dup7q11.23 phenotype	Qaiser F	Orphanet J Rare Dis	2021	2	0.7	-1
33509756	[Rare variants of HSPB1 are probably associated with amyotrophic lateral sclerosis]	Chen J	Nan Fang Yi Ke Da Xue Xue Bao	2021	2	0.7	-1
33279242	Association of rare heterozygous PLA2G6 variants with the risk of Parkinson's disease	Liu H	Neurobiol Aging	2021	2	0.7	-1
34521435	Colchicine - an effective treatment for children with a clinical diagnosis of autoinflammatory diseases without pathogenic gene variants	Welzel T	Pediatr Rheumatol Online J	2021	2	0.7	-1
33810837	New advances in Amyotrophic Lateral Sclerosis genetics: Towards gene therapy opportunities for familial and young cases	Amador MD	Rev Neurol (Paris)	2021	2	0.7	-1
33910931	Genetic burden linked to founder effects in Saguenay-Lac-Saint-Jean illustrates the importance of genetic screening test availability	Bchetnia M	J Med Genet	2021	5	1.7	-1
34796114	A Rare Manifestation of a Presumed Non-Osteophilic Brain Neoplasm: Extensive Axial Skeletal Metastases From Glioblastoma With Primitive Neuronal Components	Rong T	Front Oncol	2021	5	1.7	-1
33352116	Rare and de novo coding variants in chromodomain genes in Chiari I malformation	Sadler B	Am J Hum Genet	2021	5	1.7	-1
32990483	Distinctive phenotypes in two children with novel germline RUNX1 mutations - one with myeloid malignancy and increased fetal hemoglobin	Bagla S	Pediatr Hematol Oncol	2021	4	1.3	-1
33673279	Whole Exome Sequencing Identifies APCDD1 and HDAC5 Genes as Potentially Cancer Predisposing in Familial Colorectal Cancer	Skopelitou D	Int J Mol Sci	2021	5	1.7	-1
34089235	Caregiver-reported characteristics of children diagnosed with pathogenic variants in KDM5C	Hatch HAM	Am J Med Genet A	2021	5	1.7	-1
34014961	Genome-wide association study of vitamin D concentrations and bone mineral density in the African American-Diabetes Heart Study	Palmer ND	PLoS One	2021	4	1.3	-1
33781609	Mutation analysis of seven SLC family transporters for early-onset Parkinson's disease in Chinese population	Li C	Neurobiol Aging	2021	4	1.3	-1
34169069	Rare Modifier Variants Alter the Severity of Cardiovascular Disease in Pseudoxanthoma Elasticum: Identification of Novel Candidate Modifier Genes and Disease Pathways Through Mixture of Effects Analysis	De Vilder EYG	Front Cell Dev Biol	2021	4	1.3	-1
34571366	Distinct gene-set burden patterns underlie common generalized and focal epilepsies	Koko M	EBioMedicine	2021	4	1.3	-1
34551193	The role of vascular dementia associated genes in patients with Alzheimer's disease: A large case-control study in the Chinese population	Xiao X	CNS Neurosci Ther	2021	4	1.3	-1
34321704	Gene-Based Association Testing of Dichotomous Traits With Generalized Functional Linear Mixed Models Using Extended Pedigrees: Applications to Age-Related Macular Degeneration	Jiang Y	J Am Stat Assoc	2021	3	1	-1
32950273	Mutation analysis of LRP10 in a large Chinese familial Parkinson disease cohort	Li C	Neurobiol Aging	2021	3	1	-1
34261898	Paediatric polyposis syndromes: burden of disease and current concepts	Phen C	Curr Opin Pediatr	2021	0	0	-1
33476035	The silent variants of pituitary tumors: demographic, radiological and molecular characteristics	Torregrosa-Quesada ME	J Endocrinol Invest	2021	3	1	-1
33041088	No relationship between SRY variants and risk of Parkinson's disease in Chinese population	Pan H	Neurobiol Aging	2021	3	1	-1
33581933	Mutation screening and burden analysis of GLT8D1 in Chinese patients with amyotrophic lateral sclerosis	Cao B	Neurobiol Aging	2021	3	1	-1
33911094	Exploring associations between constipation, severity of neurofibromatosis type 1 and NF1 mutational spectrum	Ejerskov C	Sci Rep	2021	0	0	-1
34433165	The Contribution of Known Familial Cardiovascular Disease Genes to Sudden Cardiac Death in Patients Undergoing Hemodialysis	Schwantes-An TH	Cardiorenal Med	2021	0	0	-1
34246528	Analysis of PTRHD1 common and rare variants in European patients with Parkinson's disease	Sosero YL	Neurobiol Aging	2021	0	0	-1
34238613	Prevalence of predictive biomarkers in a large cohort of molecularly defined adult-type ovarian granulosa cell tumors	Hillman RT	Gynecol Oncol	2021	3	1	-1
34662354	Role of ADAMTS13, VWF and F8 genes in deep vein thrombosis	Pagliari MT	PLoS One	2021	2	0.7	-1
33555379	Personalized oncology and BRAF(K601N) melanoma: model development, drug discovery, and clinical correlation	Keller BA	J Cancer Res Clin Oncol	2021	2	0.7	-1
33526825	Polygenic burden has broader impact on health, cognition, and socioeconomic outcomes than most rare and high-risk copy number variants	Saarentaus EC	Mol Psychiatry	2021	3	1	-1
32870266	Increased Burden of Rare Sequence Variants in GnRH-Associated Genes in Women With Hypothalamic Amenorrhea	Delaney A	J Clin Endocrinol Metab	2021	3	1	-1
32690342	Rare, pathogenic variants in LRP10 are associated with amyotrophic lateral sclerosis in patients from mainland China	Ni J	Neurobiol Aging	2021	3	1	-1
37435187	Investigating the clinical, pathological and molecular profile of oncocytic adrenocortical neoplasms: a case series and literature review	Fewings E	Endocr Oncol	2021	0	0	-1
33889510	Comprehensive molecular analysis of genomic profiles and PD-L1 expression in lung adenocarcinoma with a high-grade fetal adenocarcinoma component	Suzuki M	Transl Lung Cancer Res	2021	3	1	-1
33973092	Genetic investigations of 100 inherited cardiac disease-related genes in deceased individuals with schizophrenia	Christiansen SL	Int J Legal Med	2021	3	1	-1
33754465	Pathogenic variants in KCNQ2 cause intellectual deficiency without epilepsy: Broadening the phenotypic spectrum of a potassium channelopathy	Mary L	Am J Med Genet A	2021	3	1	-1
33658156	Whole exome sequencing, a hypothesis-free approach to investigate recurrent early miscarriage	Gourhant L	Reprod Biomed Online	2021	3	1	-1
34041244	The Interaction Analysis of SNP Variants and DNA Methylation Identifies Novel Methylated Pathogenesis Genes in Congenital Heart Diseases	Wang J	Front Cell Dev Biol	2021	3	1	-1
34633764	Large-scale whole-exome sequencing association study identifies FOXH1 gene and sphingolipid metabolism pathway influencing major depressive disorder	Zhou W	CNS Neurosci Ther	2021	3	1	-1
34172279	The role of frontotemporal dementia associated genes in patients with Alzheimer's disease	Xiao X	Neurobiol Aging	2021	3	1	-1
32462456	Copy Number Variants and Polygenic Risk Scores Predict Need of Care in Autism and/or ADHD Families	LaBianca S	J Autism Dev Disord	2021	3	1	-1
33512531	Genotype-Phenotype Correlation in Fibrous Dysplasia/McCune-Albright Syndrome	Zhadina M	J Clin Endocrinol Metab	2021	3	1	-1
33367522	A unifying framework for rare variant association testing in family-based designs, including higher criticism approaches, SKATs, and burden tests	Hecker J	Bioinformatics	2021	4	1.3	-1
34456972	Evidence That the Etiology of Congenital Hypopituitarism Has a Major Genetic Component but Is Infrequently Monogenic	Jee YH	Front Genet	2021	4	1.3	-1
33636100	Mendelian pathway analysis of laboratory traits reveals distinct roles for ciliary subcompartments in common disease pathogenesis	Drivas TG	Am J Hum Genet	2021	4	1.3	-1
34868212	Rare CYLD Variants in Chinese Patients With Amyotrophic Lateral Sclerosis	Gu X	Front Genet	2021	4	1.3	-1
34194442	Genetic Analysis of Tryptophan Metabolism Genes in Sporadic Amyotrophic Lateral Sclerosis	Fifita JA	Front Immunol	2021	4	1.3	-1
33633271	The influence of human genetic variation on Epstein-Barr virus sequence diversity	Rüeger S	Sci Rep	2021	5	1.7	-1
35047849	Low frequency of treatable pediatric disease alleles in gnomAD: An opportunity for future genomic screening of newborns	Gold NB	HGG Adv	2021	4	1.3	-1
32900841	Delineation of a new fibrillin-2-opathy with evidence for a role of FBN2 in the pathogenesis of carpal tunnel syndrome	Peeters S	J Med Genet	2021	4	1.3	-1
33767731	Potential Impact of DPYD Variation on Fluoropyrimidine Drug Response in sub-Saharan African Populations	da Rocha JEB	Front Genet	2021	4	1.3	-1
34282470	Caregiver burden in patients with behavioural variant frontotemporal dementia and non-fluent variant and semantic variant primary progressive aphasia	Guger M	J Neural Transm (Vienna)	2021	3	1	-1
33688499	Glial Cell-Derived Neurotrophic Factor Functions as a Potential Candidate Gene in Obstructive Sleep Apnea Based on a Combination of Bioinformatics and Targeted Capture Sequencing Analyses	Cao Y	Biomed Res Int	2021	4	1.3	-1
33868220	Management of Monogenic IL-1 Mediated Autoinflammatory Diseases in Childhood	Welzel T	Front Immunol	2021	4	1.3	-1
34125488	Pyruvate kinase deficiency in children	Chonat S	Pediatr Blood Cancer	2021	4	1.3	-1
33964895	Study of the collagen type VI alpha 3 (COL6A3) gene in Parkinson's disease	Jin CY	BMC Neurol	2021	4	1.3	-1
33668025	Durable Response to PD-1 Blockade in a Patient With Metastatic Pancreatic Undifferentiated Carcinoma With Osteoclast-Like Giant Cells	Besaw RJ	J Natl Compr Canc Netw	2021	4	1.3	-1
34473692	Examining sex differences in neurodevelopmental and psychiatric genetic risk in anxiety and depression	Martin J	PLoS One	2021	4	1.3	-1
34273568	Unveiling the genetic variation of severe continuous/mixed-type ossification of the posterior longitudinal ligament by whole-exome sequencing and bioinformatic analysis	Lee CH	Spine J	2021	3	1	-1
33043506	Spectrum of autoimmune bullous diseases among children in Kuwait	Nanda A	Pediatr Dermatol	2021	3	1	-1
33573822	Hereditary Apolipoprotein A-1 Amyloidosis With Glu34Lys Mutation Treated by Liver Transplantation: A Case Report	Sagawa T	Transplant Proc	2021	1	0.3	-1
33576176	Increasing the resolution and precision of psychiatric genome-wide association studies by re-imputing summary statistics using a large, diverse reference panel	Chatzinakos C	Am J Med Genet B Neuropsychiatr Genet	2021	1	0.3	-1
33077920	Recurrent urothelial carcinoma-like FGFR3 genomic alterations in malignant Brenner tumors of the ovary	Lin DI	Mod Pathol	2021	1	0.3	-1
34050118	Analysis of 200 000 exome-sequenced UK Biobank subjects fails to identify genes influencing probability of developing a mood disorder resulting in psychiatric referral	Curtis D	Psychiatr Genet	2021	1	0.3	-1
33970751	Analysis of whole genome sequenced cases and controls shows that the association of variants in TOMM40, BCAM, NECTIN2 and APOC1 with late onset Alzheimer's disease is driven by linkage disequilibrium with APOE ε2/ε3/ε4 alleles	Curtis D	J Neurogenet	2021	1	0.3	-1
35070570	A Novel Variant in the AGPS Gene Causes the Rare Rhizomelic Chondrodysplasia Punctata Type 3: A Case Report	Shawli AM	Cureus	2021	1	0.3	-1
34864818	Association of low-frequency and rare coding variants with information processing speed	Bressler J	Transl Psychiatry	2021	1	0.3	-1
33814268	Investigation of ALPL variant states and clinical outcomes: An analysis of adults and adolescents with hypophosphatasia treated with asfotase alfa	Kishnani PS	Mol Genet Metab	2021	1	0.3	-1
34250953	Rare Variants Analysis of Lysosomal Related Genes in Early-Onset and Familial Parkinson's Disease in a Chinese Cohort	Chen YP	J Parkinsons Dis	2021	1	0.3	-1
33551785	Past, Present, and Future of Non-invasive Brain Stimulation Approaches to Treat Cognitive Impairment in Neurodegenerative Diseases: Time for a Comprehensive Critical Review	Sanches C	Front Aging Neurosci	2021	28	9.3	0	Method or review paper
30382371	Rare variants in the neuronal ceroid lipofuscinosis gene MFSD8 are candidate risk factors for frontotemporal dementia	Geier EG	Acta Neuropathol	2019	20	4	1
34380768	Overcoming microenvironmental resistance to PD-1 blockade in genetically engineered lung cancer models	Martinez-Usatorre A	Sci Transl Med	2021	27	9	0	Not coding variant associations
30622330	Genetic architecture of laterality defects revealed by whole exome sequencing	Li AH	Eur J Hum Genet	2019	22	4.4	1
33632673	Developmental and epileptic encephalopathies: recognition and approaches to care	Raga S	Epileptic Disord	2021	24	8	0	Method or review paper
33641055	Molecular Pathology of Well-Differentiated Pulmonary and Thymic Neuroendocrine Tumors: What Do Pathologists Need to Know?	Volante M	Endocr Pathol	2021	13	4.3	0	Method or review paper
31712721	Bipolar multiplex families have an increased burden of common risk variants for psychiatric disorders	Andlauer TFM	Mol Psychiatry	2021	12	4	2	Not gene-level associations
33446330	Replication and meta-analyses nominate numerous eosinophilic esophagitis risk genes	Kottyan LC	J Allergy Clin Immunol	2021	16	5.3	0	Not coding variant associations
33279945	Atrial fibrillation-a complex polygenetic disease	Andersen JH	Eur J Hum Genet	2021	15	5	0	Method or review paper
33658299	Comprehensive Molecular Characterization and Response to Therapy in Fumarate Hydratase-Deficient Renal Cell Carcinoma	Gleeson JP	Clin Cancer Res	2021	15	5	0	Not coding variant associations
33414550	Efficient phasing and imputation of low-coverage sequencing data using large reference panels	Rubinacci S	Nat Genet	2021	94	31.3	0	Method or review paper
34215448	Common and rare variants in HFE are not associated with Parkinson's disease in Europeans	Saini P	Neurobiol Aging	2021	0	0	-1
30766545	A New Panel-Based Next-Generation Sequencing Method for ADME Genes Reveals Novel Associations of Common and Rare Variants With Expression in a Human Liver Cohort	Klein K	Front Genet	2019	22	4.4	1
31308072	Contributions of Rare Gene Variants to Familial and Sporadic FSGS	Wang M	J Am Soc Nephrol	2019	24	4.8	1
33639990	Clinical experience with the AKT1 inhibitor miransertib in two children with PIK3CA-related overgrowth syndrome	Forde K	Orphanet J Rare Dis	2021	22	7.3	0	Not coding variant associations
34873345	Efficacy and safety of avapritinib in advanced systemic mastocytosis: interim analysis of the phase 2 PATHFINDER trial	Gotlib J	Nat Med	2021	31	10.3	0	Not coding variant associations
33737904	From Genotype to Phenotype: Expanding the Clinical Spectrum of CACNA1A Variants in the Era of Next Generation Sequencing	Indelicato E	Front Neurol	2021	30	10	0	Method or review paper
34635138	Modifiable risk factors for dementia and dementia risk profiling. A user manual for Brain Health Services-part 2 of 6	Ranson JM	Alzheimers Res Ther	2021	22	7.3	0	Method or review paper
33795387	Multiparametric flow cytometry highlights B7-H3 as a novel diagnostic/therapeutic target in GD2neg/low neuroblastoma variants	Dondero A	J Immunother Cancer	2021	19	6.3	2	Method or review paper
33568554	Understanding the Impact of Resistance to Influenza Antivirals	Holmes EC	Clin Microbiol Rev	2021	19	6.3	0	Not coding variant associations
31308240	Pleiotropic effects for Parkin and LRRK2 in leprosy type-1 reactions and Parkinson's disease	Fava VM	Proc Natl Acad Sci U S A	2019	26	5.2	1
30777372	Germline DNA Repair Gene Mutations in Young-onset Prostate Cancer Cases in the UK: Evidence for a More Extensive Genetic Panel	Leongamornlert DA	Eur Urol	2019	27	5.4	1
34516545	Rare variants in the endocytic pathway are associated with Alzheimer's disease, its related phenotypes, and functional consequences	Zhan L	PLoS Genet	2021	0	0	-1
34399825	SELP Asp603Asn and severe thrombosis in COVID-19 males	Fallerini C	J Hematol Oncol	2021	7	2.3	-1
33559384	Whole-exome sequencing reveals the major genetic factors contributing to neuromyelitis optica spectrum disorder in Chinese patients with aquaporin 4-IgG seropositivity	Zhong X	Eur J Neurol	2021	4	1.3	-1
33818783	Diverse genetic causes of polymicrogyria with epilepsy	Epilepsy Phenome/Genome Project, Epi4K Consortium	Epilepsia	2021	6	2	-1
34164638	Genetic variant effect prediction by supervised nonnegative matrix tri-factorization	Arani AA	Mol Omics	2021	1	0.3	-1
35012285	Identification of rare coding variants associated with Kawasaki disease by whole exome sequencing	Kim JJ	Genomics Inform	2021	1	0.3	-1
33408077	Association of novel rare coding variants with juvenile idiopathic arthritis	Meng X	Ann Rheum Dis	2021	4	1.3	-1
34494379	Coding Variants are Relevant to the Expression of Obesity-Related Genes for Pediatric Adiposity	Mao K	Obesity (Silver Spring)	2021	1	0.3	-1
33679876	Whole-Exome Sequencing and hiPSC Cardiomyocyte Models Identify MYRIP, TRAPPC11, and SLC27A6 of Potential Importance to Left Ventricular Hypertrophy in an African Ancestry Population	Irvin MR	Front Genet	2021	3	1	-1
34925849	Genetic analysis of four consanguineous multiplex families with inflammatory bowel disease	Ben-Yosef N	Gastroenterol Rep (Oxf)	2021	5	1.7	-1
33807868	Whole-Genome Sequencing in Diagnostics of Selected Slovenian Undiagnosed Patients with Rare Disorders	Bergant G	Life (Basel)	2021	4	1.3	-1
34319147	Rare Coding Variants Associated With Electrocardiographic Intervals Identify Monogenic Arrhythmia Susceptibility Genes: A Multi-Ancestry Analysis	Choi SH	Circ Genom Precis Med	2021	4	1.3	-1
32591784	Using off-target data from whole-exome sequencing to improve genotyping accuracy, association analysis and polygenic risk prediction	Dou J	Brief Bioinform	2021	4	1.3	-1
34015270	A computational approach for detecting physiological homogeneity in the midst of genetic heterogeneity	Zhang P	Am J Hum Genet	2021	3	1	-1
33070169	Analysis of DNA variants in miRNAs and miRNA 3'UTR binding sites in female infertility patients	Tyc KM	Lab Invest	2021	5	1.7	-1
33729739	A linkage and exome study of multiplex families with bipolar disorder implicates rare coding variants of ANK3 and additional rare alleles at 10q11-q21	Toma C	J Psychiatry Neurosci	2021	5	1.7	-1
34065289	Regulatory Noncoding and Predicted Pathogenic Coding Variants of CCR5 Predispose to Severe COVID-19	Cantalupo S	Int J Mol Sci	2021	11	3.7	0	Not coding variant associations
32996353	Whole exome sequencing identifies rare coding variants in novel human-mouse ortholog genes in African individuals diagnosed with non-syndromic hearing impairment	Oluwole OG	Exp Biol Med (Maywood)	2021	3	1	-1
34155260	Assessment of the gene mosaicism burden in blood and its implications for immune disorders	Sol√≠s-Moruno M	Sci Rep	2021	3	1	-1
33637599	Frequent amplification of HDAC genes and efficacy of HDAC inhibitor chidamide and PD-1 blockade combination in soft tissue sarcoma	Que Y	J Immunother Cancer	2021	33	11	0	Not coding variant associations
34197182	Homologous Recombination Deficiency in Pancreatic Cancer: A Systematic Review and Prevalence Meta-Analysis	Casolino R	J Clin Oncol	2021	41	13.7	0	Method or review paper
35053791	Family-Based Whole-Exome Analysis of Specific Language Impairment (SLI) Identifies Rare Variants in BUD13, a Component of the Retention and Splicing (RES) Complex	Andres EM	Brain Sci	2021	5	1.7	-1
33576571	Harnessing the paradoxical phenotypes of APOE …õ2 and APOE …õ4 to identify genetic modifiers in Alzheimer's disease	Kim YW	Alzheimers Dement	2021	9	3	0	Not coding variant associations
34819508	Geometric network analysis provides prognostic information in patients with high grade serous carcinoma of the ovary treated with immune checkpoint inhibitors	Elkin R	NPJ Genom Med	2021	6	2	-1
33763119	Genome-Wide Identification of Rare and Common Variants Driving Triglyceride Levels in a Nevada Population	Read RW	Front Genet	2021	6	2	-1
33622343	Sequential filtering for clinically relevant variants as a method for clinical interpretation of whole exome sequencing findings in glioma	√úlgen E	BMC Med Genomics	2021	0	0	-1
35414959	Integrative modeling of transmitted and de novo variants identifies novel risk genes for congenital heart disease	Li M	Quant Biol	2021	1	0.3	-1
34795310	Whole genome sequencing and in vitro splice assays reveal genetic causes for inherited retinal diseases	Fadaie Z	NPJ Genom Med	2021	20	6.7	2	Not coding variant associations
33446833	Whole-exome sequencing identifies susceptibility genes and pathways for idiopathic pulmonary fibrosis in the Chinese population	Fang C	Sci Rep	2021	2	0.7	-1
33189858	Genetic markers for depressive disorders with earlier age at onset	Kang HJ	Prog Neuropsychopharmacol Biol Psychiatry	2021	2	0.7	-1
34852802	Rare and potentially pathogenic variants in hydroxycarboxylic acid receptor genes identified in breast cancer cases	McGuire Sams C	BMC Med Genomics	2021	2	0.7	-1
33758299	Identification of a missense variant in SPDL1 associated with idiopathic pulmonary fibrosis	Dhindsa RS	Commun Biol	2021	20	6.7	0	Not gene-level associations
30675382	Both rare and common genetic variants contribute to autism in the Faroe Islands	Leblond CS	NPJ Genom Med	2019	32	6.4	1
36415240	Fabry disease in South and Central Asia: Is it truly a rare disease or underappreciated?	Saeed S	Pak J Med Sci	2022	0	0	-1
35925583	Phenotypic Expression of CFH Rare Variants in Age-Related Macular Degeneration Patients in the Coimbra Eye Study	Farinha C	Invest Ophthalmol Vis Sci	2022	0	0	-1
35580510	Protein interaction network analysis reveals genetic enrichment of immune system genes in frontotemporal dementia	Koçoğlu C	Neurobiol Aging	2022	0	0	-1
34688815	Exploration of weighting schemes based on allele frequency and annotation for weighted burden association analysis of complex phenotypes	Curtis D	Gene	2022	0	0	-1
34987162	Author Correction: Increased burden of ultra-rare structural variants localizing to boundaries of topologically associated domains in schizophrenia	Halvorsen M	Nat Commun	2022	0	0	-1
35810345	Burden tests can be used to map causal genes for a simple metabolic trait in an exome-sequenced polyploid mutant population	Menard GN	Plant Biotechnol J	2022	0	0	-1
36046661	Whole Exome Sequencing Revealed Variants That Predict Pulmonary Artery Involvement in Patients with Takayasu Arteritis	Liu L	J Inflamm Res	2022	0	0	-1
35442562	Impact of parental relatedness on reproductive outcomes among the Old Order Amish of Lancaster County	Lynch MT	Am J Med Genet A	2022	0	0	-1
35927488	Differences in the genetic architecture of common and rare variants in childhood, persistent and late-diagnosed attention-deficit hyperactivity disorder	Rajagopal VM	Nat Genet	2022	14	7	2	Not gene-level associations
34919654	Analysing an allelic series of rare missense variants of CACNA1I in a Swedish schizophrenia cohort	Baez-Nieto D	Brain	2022	12	6	2	Not coding variant associations
34930020	Arrhythmia Variant Associations and Reclassifications in the eMERGE-III Sequencing Study	Glazer AM	Circulation	2022	12	6	0	Not gene-level associations
35902734	The promise of new anti-obesity therapies arising from knowledge of genetic obesity traits	Hinney A	Nat Rev Endocrinol	2022	16	8	0	Method or review paper
36263208	Genomic landscape of lung cancer in the young	Ruiz R	Front Oncol	2022	0	0	-1
31624253	De novo and recessive forms of congenital heart disease have distinct genetic and phenotypic landscapes	Watkins WS	Nat Commun	2019	34	6.8	1
35709961	von Hippel-Lindau disease: Updated guideline for diagnosis and surveillance	Louise M Binderup M	Eur J Med Genet	2022	12	6	0	Method or review paper
30679032	Exome Chip Meta-analysis Fine Maps Causal Variants and Elucidates the Genetic Architecture of Rare Coding Variants in Smoking and Alcohol Use	Brazel DM	Biol Psychiatry	2019	34	6.8	1
35452178	Diagnosis, monitoring, and management of pyruvate kinase deficiency in children	Johnson S	Pediatr Blood Cancer	2022	1	0.5	-1
34358316	Costs of Guillain-Barré Syndrome in the Brazilian Federal District: the patients' perspective	Oliveira AFM	Trans R Soc Trop Med Hyg	2022	1	0.5	-1
35590255	Psychiatric manifestations of rare variation in medically actionable genes: a PheWAS approach	Feng YA	BMC Genomics	2022	1	0.5	-1
35610039	(68)Ga-Pentixafor PET/CT Demonstrating In Vivo CXCR4 Receptor Overexpression in Rare Lung Malignancies: Correlation with Histologic and Histochemical Findings	Watts A	J Nucl Med Technol	2022	1	0.5	-1
34981790	Addressing dyslipidemic risk beyond LDL-cholesterol	Tall AR	J Clin Invest	2022	30	15	0	Not coding variant associations
31135820	Association of Early-Onset Alzheimer Disease With Elevated Low-Density Lipoprotein Cholesterol Levels and Rare Genetic Coding Variants of APOB	Wingo TS	JAMA Neurol	2019	44	8.8	1
35848037	Rare Variant Analysis of PTRHD1 in Parkinson's Disease in the Chinese Population	Li C	J Parkinsons Dis	2022	0	0	-1
35907708	Evaluating the role of rare genetic variation in sleep duration	Meng P	Sleep Health	2022	0	0	-1
36324633	Genetic Testing for Malformations of Cortical Development: A Clinical Diagnostic Study	Straka B	Neurol Genet	2022	1	0.5	-1
34687117	Rare germline variants in childhood cancer patients suspected of genetic predisposition to cancer	Sylvester DE	Genes Chromosomes Cancer	2022	1	0.5	-1
35954343	Germline Variants Associated with Nasopharyngeal Carcinoma Predisposition Identified through Whole-Exome Sequencing	Lee NY	Cancers (Basel)	2022	1	0.5	-1
36044719	Isolated MLH1 Loss by Immunohistochemistry Because of Benign Germline MLH1 Polymorphisms	Bosch DE	JCO Precis Oncol	2022	1	0.5	-1
36570541	Association between NOTCH3 gene and Parkinson's disease based on whole-exome sequencing	Zeng Q	Front Aging Neurosci	2022	0	0	-1
37034481	Integration of multimodal data in the developing tooth reveals candidate regulatory loci driving human odontogenic phenotypes	Winchester EW	Front Dent Med	2022	1	0.5	-1
35381901	BAP1-defficient breast cancer in a patient with BAP1 cancer syndrome	Blatnik A	Breast Cancer	2022	1	0.5	-1
34542152	A genome-first approach to rare variants in hypertrophic cardiomyopathy genes MYBPC3 and MYH7 in a medical biobank	Park J	Hum Mol Genet	2022	4	2	-1
35145093	Whole exome sequencing in Alopecia Areata identifies rare variants in KRT82	Erjavec SO	Nat Commun	2022	4	2	-1
35495142	Whole Exome Sequencing Identifies Genes Associated With Non-Obstructive Azoospermia	Zhang H	Front Genet	2022	4	2	-1
35379910	The impact of educational attainment, intelligence and intellectual disability on schizophrenia: a Swedish population-based register and genetic study	Song J	Mol Psychiatry	2022	4	2	-1
35237542	Genome-Wide Association Study-Guided Exome Rare Variant Burden Analysis Identifies IL1R1 and CD3E as Potential Autoimmunity Risk Genes for Celiac Disease	Mansour H	Front Pediatr	2022	4	2	-1
35113648	Rare Variation in Drug Metabolism and Long QT Genes and the Genetic Susceptibility to Acquired Long QT Syndrome	Gray B	Circ Genom Precis Med	2022	4	2	-1
34036930	Molecular analysis of dilated and left ventricular noncompaction cardiomyopathies in Egyptian children	Mehaney DA	Cardiol Young	2022	4	2	-1
33910933	Analysis of 200 000 exome-sequenced UK Biobank subjects illustrates the contribution of rare genetic variants to hyperlipidaemia	Curtis D	J Med Genet	2022	4	2	-1
35860667	Genetic Analysis of Six Transmembrane Protein Family Genes in Parkinson's Disease in a Large Chinese Cohort	Zhao Y	Front Aging Neurosci	2022	4	2	-1
35588732	Integration of rare expression outlier-associated variants improves polygenic risk prediction	Smail C	Am J Hum Genet	2022	4	2	-1
35283196	Whole-genome sequencing identifies rare missense variants of WNT16 and ERVW-1 causing the systemic lupus erythematosus	Chen J	Genomics	2022	4	2	-1
35495172	Unraveling the Genetic Architecture of Hepatoblastoma Risk: Birth Defects and Increased Burden of Germline Damaging Variants in Gastrointestinal/Renal Cancer Predisposition and DNA Repair Genes	Aguiar T	Front Genet	2022	4	2	-1
36462464	Pan-tumor landscape of fibroblast growth factor receptor 1-4 genomic alterations	Murugesan K	ESMO Open	2022	4	2	-1
35772917	LMNA Variants and Risk of Adult-Onset Cardiac Disease	Lazarte J	J Am Coll Cardiol	2022	4	2	-1
34493817	Rare GATA6 variants associated with risk of congenital heart disease phenotypes in 200,000 UK Biobank exomes	Williams SG	J Hum Genet	2022	3	1.5	-1
36513072	Exome-wide association analysis of CT imaging-derived hepatic fat in a medical biobank	Park J	Cell Rep Med	2022	3	1.5	-1
35650585	Mapping the genetic landscape of early-onset Alzheimer's disease in a cohort of 36 families	Mol MO	Alzheimers Res Ther	2022	3	1.5	-1
36077692	Identification of Fusion Genes and Targets for Genetically Matched Therapies in a Large Cohort of Salivary Gland Cancer Patients	Lassche G	Cancers (Basel)	2022	3	1.5	-1
36112137	Functional characteristics of a broad spectrum of TBX6 variants in Mayer-Rokitansky-Küster-Hauser syndrome	Ma C	Genet Med	2022	3	1.5	-1
36273452	Comparative Somatic Variant Analysis of a Rare Case with Concurrent Oral Leukoplakia and Oral Submucosal Fibrosis	Anne A	Cytogenet Genome Res	2022	0	0	-1
34664540	Rare variant association study of veteran twin whole-genomes links severe depression with a nonsynonymous change in the neuronal gene BHLHE22	Hupalo D	World J Biol Psychiatry	2022	0	0	-1
36090499	Framework From a Multidisciplinary Approach for Transitioning Variants of Unknown Significance From Clinical Genetic Testing in Kidney Disease to a Definitive Classification	Mirshahi UL	Kidney Int Rep	2022	0	0	-1
36140714	The GDAP1 p.Glu222Lys Variant-Weak Pathogenic Effect, Cumulative Effect of Weak Sequence Variants, or Synergy of Both Factors?	Kabzińska D	Genes (Basel)	2022	0	0	-1
36353017	Guillain-barré syndrome without limb weakness: A rare variant with acute bulbar palsy	Chavada IJ	J Family Med Prim Care	2022	0	0	-1
35205424	Leveraging Gene-Level Prediction as Informative Covariate in Hypothesis Weighting Improves Power for Rare Variant Association Studies	Ji Y	Genes (Basel)	2022	0	0	-1
35150001	Contribution of common and rare genetic variants in CEP72 on vincristine-induced peripheral neuropathy in brain tumour patients	Klumpers MJ	Br J Clin Pharmacol	2022	0	0	-1
35821219	The diversity of hereditary neuromuscular diseases: Experiences from molecular diagnosis	Hsueh HW	J Formos Med Assoc	2022	0	0	-1
35266528	GenRisk: a tool for comprehensive genetic risk modeling	Aldisi R	Bioinformatics	2022	3	1.5	-1
36158696	Exome sequencing link mutation in RGPD4 with systemic sclerosis-associated interstitial lung disease and the low level of testosterone-an exploration study	Wang N	Front Oncol	2022	0	0	-1
35480996	Genomic Variations and Immune-Related Features of TMB, PD-L1 Expression and CD8(+) T Cell Infiltration in Chinese Pulmonary Sarcomatoid Carcinoma	Zhang C	Int J Gen Med	2022	3	1.5	-1
34281439	A Genome-First Approach to Rare Variants in Dominant Postlingual Hearing Loss Genes in a Large Adult Population	Ahmadmehrabi S	Otolaryngol Head Neck Surg	2022	3	1.5	-1
34061439	Variant analyses of candidate genes in orofacial clefts in multi-ethnic populations	Li M	Oral Dis	2022	3	1.5	-1
35183128	Rare coding variants in RCN3 are associated with blood pressure	He KY	BMC Genomics	2022	0	0	-1
35928792	Investigation of CACNA1I Cav3.3 Dysfunction in Hemiplegic Migraine	Maksemous N	Front Mol Neurosci	2022	3	1.5	-1
35116055	Case Report and Literature Review: Diagnosis, Tailored Genetic Counseling and Cancer Prevention for a Locally Advanced dMMR/MSI-H/TMB-H Lung Cancer Patient With Concurrent Lynch Syndrome Mediated by a Rare PMS2 Splicing Variant (c.1144+1G>A)	Han Q	Front Genet	2022	3	1.5	-1
35551639	Clinical and genetic spectrums of 413 North African families with inherited retinal dystrophies and optic neuropathies	Bouzidi A	Orphanet J Rare Dis	2022	3	1.5	-1
34931221	Deviation from baseline mutation burden provides powerful and robust rare-variants association test for complex diseases	Jiang L	Nucleic Acids Res	2022	3	1.5	-1
35740599	Deep Sequencing of Early T Stage Colorectal Cancers Reveals Disruption of Homologous Recombination Repair in Microsatellite Stable Tumours with High Mutational Burdens	Li J	Cancers (Basel)	2022	3	1.5	-1
35368043	A whole genome sequencing study of moderate to severe asthma identifies a lung function locus associated with asthma risk	Chang D	Sci Rep	2022	3	1.5	-1
35464866	Genetic Variants of Glycogen Metabolism Genes Were Associated With Liver PDFF Without Increasing NAFLD Risk	Yang L	Front Genet	2022	0	0	-1
35449176	Clinical relevance of pathogenic germline variants in mismatch repair genes in Chinese breast cancer patients	Hu L	NPJ Breast Cancer	2022	3	1.5	-1
35592775	The Value of Rare Genetic Variation in the Prediction of Common Obesity in European Ancestry Populations	Wang Z	Front Endocrinol (Lausanne)	2022	3	1.5	-1
36297665	Therapeutic Drug Monitoring of Quinidine in Pediatric Patients with KCNT1 Genetic Variants	Ferretti A	Pharmaceutics	2022	0	0	-1
34847388	Clear cell renal cell carcinoma with prominent microvascular hyperplasia: Morphologic, immunohistochemical and molecular-genetic analysis of 7 sporadic cases	Alaghehbandan R	Ann Diagn Pathol	2022	0	0	-1
35158968	Potential Involvement of NSD1, KRT24 and ACACA in the Genetic Predisposition to Colorectal Cancer	Quintana I	Cancers (Basel)	2022	0	0	-1
35841715	Hereditary Hyperekplexia in Saudi Arabia	Aldhilan A	Pediatr Neurol	2022	0	0	-1
35176026	Analysing pneumococcal invasiveness using Bayesian models of pathogen progression rates	Løchen A	PLoS Comput Biol	2022	4	2	-1
36035235	Frequency and Phenotype Associations of Rare Variants in 5 Monogenic Cerebral Small Vessel Disease Genes in 200,000 UK Biobank Participants	Ferguson AC	Neurol Genet	2022	3	1.5	-1
36210504	Copy Number Variants Are Ovarian Cancer Risk Alleles at Known and Novel Risk Loci	DeVries AA	J Natl Cancer Inst	2022	3	1.5	-1
35021256	Thrombotic Risk Determined by Protein C Receptor (PROCR) Variants among Middle-Aged and Older Adults: A Population-Based Cohort Study	Manderstedt E	Thromb Haemost	2022	3	1.5	-1
35854894	Here comes the story of the Hurricane': a case report of AL cardiac amyloidosis and myocardial bridging	Cappannoli L	Eur Heart J Case Rep	2022	3	1.5	-1
36577525	Whole-genome characterization of myoepithelial carcinomas of the soft tissue	Cyrta J	Cold Spring Harb Mol Case Stud	2022	0	0	-1
35562164	Hereditary neuropathies: Genetics and utility of nerve biopsy	Yasha TC	Indian J Pathol Microbiol	2022	0	0	-1
35276586	Evaluation of common and rare variants of Alzheimer's disease-causal genes in Parkinson's disease	Zeng Q	Parkinsonism Relat Disord	2022	4	2	-1
35838042	The burden of SARS-CoV-2 in patients receiving chimeric antigen receptor T cell immunotherapy: everything to lose	Luque-Paz D	Expert Rev Anti Infect Ther	2022	3	1.5	-1
35574020	Heterozygous Genetic Variants in Autosomal Recessive Genes of the Leptin-Melanocortin Signalling Pathway Are Associated With the Development of Childhood Obesity	Šket R	Front Endocrinol (Lausanne)	2022	3	1.5	-1
34519126	Epilepsy, electroclinical features, and long-term outcomes in Pitt-Hopkins syndrome due to pathogenic variants in the TCF4 gene	Matricardi S	Eur J Neurol	2022	3	1.5	-1
36450758	Using coding and non-coding rare variants to target candidate genes in patients with severe tinnitus	Gallego-Martinez A	NPJ Genom Med	2022	4	2	-1
35795120	Pathological complete response of plasmacytoid variant bladder cancer to pembrolizumab following genomic analysis	Goto Y	IJU Case Rep	2022	0	0	-1
36534060	Rare Genetic Variation and Outcome of Surgery for Mesial Temporal Lobe Epilepsy	Perucca P	Ann Neurol	2022	0	0	-1
35272499	Whole-Exome Sequencing in Congenital Hypothyroidism Due to Thyroid Dysgenesis	Larrivée-Vanier S	Thyroid	2022	0	0	-1
36350824	A novel pathogenesis concept of biliary atresia approached by combined molecular strategies	Laochareonsuk W	PLoS One	2022	0	0	-1
36088851	Druggable gene alterations in Japanese patients with rare malignancy	Ohmoto A	Neoplasia	2022	0	0	-1
35782655	Primary Adenosquamous Carcinoma of the Prostate with Rectal Invasion	Azzi P	Case Rep Urol	2022	0	0	-1
34531044	Evaluating the role of ARSA in Chinese patients with Parkinson's disease	Pan HX	Neurobiol Aging	2022	4	2	-1
31562340	Characterizing rare and low-frequency height-associated variants in the Japanese population	Akiyama M	Nat Commun	2019	70	14	1
34703007	Integration of DNA sequencing with population pharmacokinetics to improve the prediction of irinotecan exposure in cancer patients	Karas S	Br J Cancer	2022	5	2.5	0	Not coding variant associations
35392854	Longitudinal profiling of circulating tumour DNA for tracking tumour dynamics in pancreatic cancer	Sivapalan L	BMC Cancer	2022	5	2.5	0	Not coding variant associations
35258170	Progranulin mutations in clinical and neuropathological Alzheimer's disease	Vardarajan BN	Alzheimers Dement	2022	5	2.5	2	Not gene-level associations
36122798	Analysis of rare disruptive germline mutations in 2135 enriched BRCA-negative breast cancers excludes additional high-impact susceptibility genes	Loveday C	Ann Oncol	2022	4	2	-1
31327507	Ultra-Rare Genetic Variation in the Epilepsies: A Whole-Exome Sequencing Study of 17,606 Individuals	Epi25 Collaborative. Electronic address: s.berkovic@unimelb.edu.au	Am J Hum Genet	2019	94	18.8	1
35639375	Genetic and Clinical Characteristics of Patients in the Middle East With Multisystem Inflammatory Syndrome in Children	Abuhammour W	JAMA Netw Open	2022	5	2.5	2	Not gene-level associations
35307610	What we have learned about lymphocytic variant hypereosinophilic syndrome: A systematic literature review	Shi Y	Clin Immunol	2022	5	2.5	0	Method or review paper
36620199	Genotype Value Decomposition: Simple Methods for the Computation of Kernel Statistics	Misawa K	Adv Genet (Hoboken)	2022	0	0	-1
35764379	Uncovering the burden of hidden ciliopathies in the 100 000 Genomes Project: a reverse phenotyping approach	Best S	J Med Genet	2022	2	1	-1
36476812	Whole exome sequencing in dense families suggests genetic pleiotropy amongst Mendelian and complex neuropsychiatric syndromes	Ganesh S	Sci Rep	2022	2	1	-1
34544586	Enrichment of rare variants in E3 ubiquitin ligase genes in Early onset Parkinson's disease	Gu X	Neurobiol Aging	2022	2	1	-1
36273030	Identification and functional interpretation of miRNAs affected by rare CNVs in CAKUT	Mitrovic K	Sci Rep	2022	2	1	-1
35603907	The missing heritability in type 1 diabetes	Pang H	Diabetes Obes Metab	2022	2	1	-1
35325842	Clinical characteristics and treatment experience of individuals with SCN8A developmental and epileptic encephalopathy (SCN8A-DEE): Findings from an online caregiver survey	Cutts A	Seizure	2022	2	1	-1
35170803	Integrating external controls in case-control studies improves power for rare-variant tests	Li Y	Genet Epidemiol	2022	2	1	-1
35330074	Over-Mutated Mitochondrial, Lysosomal and TFEB-Regulated Genes in Parkinson's Disease	Segur-Bailach E	J Clin Med	2022	0	0	-1
33893496	Investigation of Association of Rare, Functional Genetic Variants With Heavy Drinking and Problem Drinking in Exome Sequenced UK Biobank Participants	Curtis D	Alcohol Alcohol	2022	0	0	-1
35242166	Targeted Re-Sequencing of the 2p21 Locus Identifies Non-Syndromic Cleft Lip Only Novel Susceptibility Gene ZFP36L2	Li MJ	Front Genet	2022	2	1	-1
35235652	PLIN1 Haploinsufficiency Causes a Favorable Metabolic Profile	Patel KA	J Clin Endocrinol Metab	2022	2	1	-1
35474605	A minority of somatically mutated genes in pre-existing fatty liver disease have prognostic importance in the development of NAFLD	Mann JP	Liver Int	2022	0	0	-1
36306459	Screening for Genetic Mutations Associated with Early-Onset Alzheimer's Disease in Han Chinese	Liu C	Curr Alzheimer Res	2022	0	0	-1
36112222	TREM2 risk variants are associated with atypical Alzheimer's disease	Kim B	Acta Neuropathol	2022	2	1	-1
36073358	Deleterious Mutations and the Rare Allele Burden on Rice Gene Expression	Lye Z	Mol Biol Evol	2022	2	1	-1
35544191	Copy Number Variant Risk Scores Associated With Cognition, Psychopathology, and Brain Structure in Youths in the Philadelphia Neurodevelopmental Cohort	Alexander-Bloch A	JAMA Psychiatry	2022	3	1.5	-1
35783621	The Involvement of ALPK3 in Hypertrophic Cardiomyopathy in East Asia	Dai J	Front Med (Lausanne)	2022	2	1	-1
36108770	Systems genomics in age-related macular degeneration	den Hollander AI	Exp Eye Res	2022	2	1	-1
35578305	The prevalence of Fabry disease among 1009 unrelated patients with hypertrophic cardiomyopathy: a Russian nationwide screening program using NGS technology	Savostyanov K	Orphanet J Rare Dis	2022	3	1.5	-1
36415271	Fabry disease: Definition, Incidence, Clinical presentations and Treatment - Focus on cardiac involvement	Saeed S	Pak J Med Sci	2022	3	1.5	-1
36416825	Molecular Typing and Clinical Characteristics of Synchronous Multiple Primary Colorectal Cancer	Zhao Y	JAMA Netw Open	2022	3	1.5	-1
36506323	Genes in pediatric pulmonary arterial hypertension and the most promising BMPR2 gene therapy	Dai L	Front Genet	2022	0	0	-1
35780200	Protein and functional isoform levels and genetic variants of the BAFF and APRIL pathway components in systemic lupus erythematosus	Ortiz-Aljaro P	Sci Rep	2022	0	0	-1
34302607	Whole-exome sequencing reveals genetic risks of early-onset sporadic dilated cardiomyopathy in the Chinese Han population	Xiao L	Sci China Life Sci	2022	5	2.5	3	Can't access
30671673	Leveraging linkage evidence to identify low-frequency and rare variants on 16p13 associated with blood pressure using TOPMed whole genome sequencing data			2019	13	6.5	1	Additional curation
35861376	The mutation spectrum of Parkinson-disease-related genes in early-onset Parkinson's disease in ethnic Chinese	Chen YP	Eur J Neurol	2022	5	2.5	3	Can't access
31036833	Exome sequencing in patients with chronic central serous chorioretinopathy			2019	8	4	1	Additional curation
35366355	The humanistic burden of vitiligo: a systematic literature review of quality-of-life outcomes	Picardo M	J Eur Acad Dermatol Venereol	2022	6	3	0	Method or review paper
31118516	Exome sequencing of 20,791 cases of type 2 diabetes and 24,440 controls			2019	155	77.5	1	Additional curation
32128068	Identification of rare variants in novel candidate genes in pulmonary atresia patients by next generation sequencing			2020	10	5	1	Additional curation
35246634	Region-based analysis of rare genomic variants in whole-genome sequencing datasets reveal two novel Alzheimer's disease-associated genes: DTNB and DLG2	Prokopenko D	Mol Psychiatry	2022	6	3	2	Not gene-level associations
35186825	Unraveling the Genetics of Congenital Diaphragmatic Hernia: An Ongoing Challenge	Brosens E	Front Pediatr	2022	7	3.5	2	Method or review paper
36300346	Association of Vascular Risk Factors and Genetic Factors With Penetrance of Variants Causing Monogenic Stroke	Cho BPH	JAMA Neurol	2022	6	3	2	Not gene-level associations
29304371	Rare Coding Variants in ANGPTL6 Are Associated with Familial Forms of Intracranial Aneurysm	Bourcier R	Am J Hum Genet	2018	15	2.5	1
35042965	Rare germline copy number variants (CNVs) and breast cancer risk	Dennis J	Commun Biol	2022	6	3	0	Copy number variants
30060175	Whole exome sequencing analysis in severe chronic obstructive pulmonary disease	Qiao D	Hum Mol Genet	2018	17	2.8	1
35138330	Association of Titin Variations With Late-Onset Dilated Cardiomyopathy	Cannatà A	JAMA Cardiol	2022	6	3	2	Not coding variant associations
35626091	Comprehensive Analysis of Acquired Genetic Variants and Their Prognostic Impact in Systemic Mastocytosis	González-López O	Cancers (Basel)	2022	1	0.5	-1
35567899	Variants in the Niemann-pick type C genes are not associated with Alzheimer's disease: a large case-control study in the Chinese population	Xiao X	Neurobiol Aging	2022	1	0.5	-1
35021184	Rare variant association tests for ancestry-matched case-control data based on conditional logistic regression	Cheng S	Brief Bioinform	2022	1	0.5	-1
35490291	Diagnosis and discovery: Insights from the NIH Undiagnosed Diseases Program	Montano C	J Inherit Metab Dis	2022	2	1	-1
37117740	The burden of rare protein-truncating genetic variants on human lifespan	Liu JZ	Nat Aging	2022	2	1	-1
36252120	Validation of Polygenic Risk Scores for Coronary Heart Disease in a Middle Eastern Cohort Using Whole Genome Sequencing	Saad M	Circ Genom Precis Med	2022	2	1	-1
35699097	Sequencing of selected chromatin remodelling genes reveals increased burden of rare missense variants in ASD patients from the Japanese population	Lo T	Int Rev Psychiatry	2022	2	1	-1
35401413	Deciphering Genetic Susceptibility to Tuberculous Meningitis	Schurz H	Front Neurol	2022	2	1	-1
36275200	Identifying Novel Genes and Variants in Immune and Coagulation Pathways Associated with Macular Degeneration	Huan T	Ophthalmol Sci	2022	2	1	-1
36502452	Burden of Rare Copy Number Variants in Microcephaly: A Brazilian Cohort of 185 Microcephalic Patients and Review of the Literature	Tolezano GC	J Autism Dev Disord	2022	2	1	-1
35811316	Exome sequencing analysis of Japanese autism spectrum disorder case-control sample supports an increased burden of synaptic function-related genes	Kimura H	Transl Psychiatry	2022	2	1	-1
35228337	Exome-wide Analysis of De Novo and Rare Genetic Variants in Patients With Brain Arteriovenous Malformation	Wang K	Neurology	2022	2	1	-1
35418949	Can Digenic, Tri-Allelic Inheritance of Variants in STAR and CYP11A1 Give Rise to Primary Adrenal Insufficiency? A Case Report	Ali N	Front Endocrinol (Lausanne)	2022	2	1	-1
35047017	Contribution of Rare and Low-Frequency Variants to Multiple Sclerosis Susceptibility in the Italian Continental Population	Clarelli F	Front Genet	2022	2	1	-1
34922125	Burden of rare coding variants in an Italian cohort of familial multiple sclerosis	Mascia E	J Neuroimmunol	2022	2	1	-1
35141295	Identification of Rare Variants in Right Ventricular Outflow Tract Obstruction Congenital Heart Disease by Whole-Exome Sequencing	Zhou Y	Front Cardiovasc Med	2022	2	1	-1
35067685	Weighted burden analysis in 200,000 exome-sequenced subjects characterises rare variant effects on BMI	Curtis D	Int J Obes (Lond)	2022	2	1	-1
34939129	Chasing a rarity: a retrospective single-center evaluation of prognostic factors in primary gliosarcoma	Dejonckheere CS	Strahlenther Onkol	2022	2	1	-1
36180924	Sequencing individual genomes with recurrent genomic disorder deletions: an approach to characterize genes for autosomal recessive rare disease traits	Yuan B	Genome Med	2022	1	0.5	-1
36274122	CLIN_SKAT: an R package to conduct association analysis using functionally relevant variants	Chattopadhyay A	BMC Bioinformatics	2022	0	0	-1
34779034	Precisely modeling zero-inflated count phenotype for rare variants	Fan Q	Genet Epidemiol	2022	0	0	-1
36297015	Whole Exome Sequencing Study Identifies Novel Rare Risk Variants for Habitual Coffee Consumption Involved in Olfactory Receptor and Hyperphagia	Cheng B	Nutrients	2022	0	0	-1
35461379	Whole-genome sequencing analysis of clozapine-induced myocarditis	Narang A	Pharmacogenomics J	2022	0	0	-1
36419110	Whole-exome sequencing identifies novel protein-altering variants associated with serum apolipoprotein and lipid concentrations	Sandholm N	Genome Med	2022	0	0	-1
35853984	Identification of FAT3 as a new candidate gene for adolescent idiopathic scoliosis	Nada D	Sci Rep	2022	0	0	-1
35199637	Chromosome 22q11 copy number variants and single ventricle CHD	Geoffrion TR	Cardiol Young	2022	0	0	-1
35663717	Adenocarcinoma of Urinary Bladder With Distant Metastasis: Huge Fungating Tumor Eroding and Ripping-Off Through Suprapubic Region: A Rare Presentation	Gupta S	Cureus	2022	0	0	-1
34741701	Fanconi anemia gene-associated germline predisposition in aplastic anemia and hematologic malignancies	Nie D	Front Med	2022	2	1	-1
34980126	A genomic mutation spectrum of collecting duct carcinoma in the Chinese population	Zhang H	BMC Med Genomics	2022	2	1	-1
36386175	The association of ARRB1 polymorphisms with response to antidepressant treatment in depressed patients	Chappell K	Front Pharmacol	2022	2	1	-1
34602499	Axial Impairment Following Deep Brain Stimulation in Parkinson's Disease: A Surgicogenomic Approach	Visanji NP	J Parkinsons Dis	2022	2	1	-1
35512496	Lack of association of TP73 with amyotrophic lateral sclerosis in a large cohort of cases	Dilliott AA	Neurobiol Aging	2022	2	1	-1
36510145	Genetic analysis of the ATP11B gene in Chinese Han population with cerebral small vessel disease	Yu WK	BMC Genomics	2022	0	0	-1
36137074	Association analyses of rare variants identify two genes associated with refractive error	Patasova K	PLoS One	2022	0	0	-1
36232667	The Potential Connection between Molecular Changes and Biomarkers Related to ALS and the Development and Regeneration of CNS	Glavač D	Int J Mol Sci	2022	2	1	-1
35333541	Gorlin Syndrome: Assessing Genotype-Phenotype Correlations and Analysis of Early Clinical Characteristics as Risk Factors for Disease Severity	Betancourt NJ	J Clin Oncol	2022	2	1	-1
35884425	Uncovering the Contribution of Moderate-Penetrance Susceptibility Genes to Breast Cancer by Whole-Exome Sequencing and Targeted Enrichment Sequencing of Candidate Genes in Women of European Ancestry	Dumont M	Cancers (Basel)	2022	2	1	-1
35519826	Identification and validation of candidate risk genes in endocytic vesicular trafficking associated with esophageal atresia and tracheoesophageal fistulas	Zhong G	HGG Adv	2022	2	1	-1
34674339	Pregnancy in women with Brugada syndrome: Is there an increased arrhythmia risk? A case-series report	van der Crabben SN	J Cardiovasc Electrophysiol	2022	2	1	-1
29181857	Whole-exome sequencing of the BDR cohort: evidence to support the role of the PILRA gene in Alzheimer's disease	Patel T	Neuropathol Appl Neurobiol	2018	18	3	1
35298028	A pharmacogenomic assessment of psychiatric adverse drug reactions to levetiracetam	Campbell C	Epilepsia	2022	6	3	0	Not coding variant associations
36185247	Comprehensive analyses of genomic features and mutational signatures in adenosquamous carcinoma of the lung	Wang H	Front Oncol	2022	4	2	-1
35147171	Polygenic risk impacts PDGFRA mutation penetrance in non-syndromic cleft lip and palate	Yu Y	Hum Mol Genet	2022	4	2	-1
34670123	Whole genome sequencing in transposition of the great arteries and associations with clinically relevant heart, brain and laterality genes	Blue GM	Am Heart J	2022	6	3	2	Not gene-level associations
35362483	Lessons learned: next-generation sequencing applied to undiagnosed genetic diseases	Schuler BA	J Clin Invest	2022	7	3.5	0	Method or review paper
35288096	Genomic and Metabolic Hallmarks of SDH- and FH-deficient Renal Cell Carcinomas	Yoo A	Eur Urol Focus	2022	7	3.5	2	Not gene-level associations
35679801	The role of common genetic variation in presumed monogenic epilepsies	Campbell C	EBioMedicine	2022	7	3.5	0	Method or review paper
29981437	Rare Variants in Known Susceptibility Loci and Their Contribution to Risk of Lung Cancer	Liu Y	J Thorac Oncol	2018	19	3.2	1
36292647	From Genotype to Phenotype-A Review of Kabuki Syndrome	Barry KK	Genes (Basel)	2022	6	3	0	Method or review paper
36074711	The hemoglobinopathies, molecular disease mechanisms and diagnostics	Harteveld CL	Int J Lab Hematol	2022	6	3	0	Method or review paper
35027292	Genetic Determinants of Sudden Unexpected Death in Pediatrics	Koh HY	Genet Med	2022	7	3.5	2	Not gene-level associations
30405126	Cohort-wide deep whole genome sequencing and the allelic architecture of complex traits	Gilly A	Nat Commun	2018	19	3.2	1
35008396	Circulating Cell-Free DNA-Based Comprehensive Molecular Analysis of Biliary Tract Cancers Using Next-Generation Sequencing	Csoma SL	Cancers (Basel)	2022	7	3.5	2	Not coding variant associations
29544907	Mendelian adult-onset leukodystrophy genes in Alzheimer's disease: critical influence of CSF1R and NOTCH3	Sassi C	Neurobiol Aging	2018	20	3.3	1
35365809	Admixture Mapping of Alzheimer's disease in Caribbean Hispanics identifies a new locus on 22q13.1	Kizil C	Mol Psychiatry	2022	7	3.5	0	Not coding variant associations
29036630	Resequencing Epithelial Sodium Channel Genes Identifies Rare Variants Associated With Blood Pressure Salt-Sensitivity: The GenSalt Study	Gu X	Am J Hypertens	2018	20	3.3	1
35180557	Lifetime risk of autosomal recessive neurodegeneration with brain iron accumulation (NBIA) disorders calculated from genetic databases	Kolarova H	EBioMedicine	2022	7	3.5	2	Not coding variant associations
35580748	Involvement of cranial nerves in ATTR Ile127Val amyloidosis	Silva Batista JAD	Eur J Med Genet	2022	1	0.5	-1
34807970	Whole-exome analysis of adolescents with low VWF and heavy menstrual bleeding identifies novel genetic associations	Sadler B	Blood Adv	2022	1	0.5	-1
36324795	Rare predicted loss-of-function variants of type I IFN immunity genes are associated with life-threatening COVID-19	Matuozzo D	medRxiv	2022	1	0.5	-1
35154239	Prevalence and Spectrum of Predisposition Genes With Germline Mutations Among Chinese Patients With Bowel Cancer	Xie Z	Front Genet	2022	1	0.5	-1
35986737	Heterozygous UCHL1 loss-of-function variants cause a neurodegenerative disorder with spasticity, ataxia, neuropathy, and optic atrophy	Park J	Genet Med	2022	1	0.5	-1
35020748	Rare variants in previously identified linkage regions associated with carotid plaque in Dominican Republic families	Dueker ND	PLoS One	2022	1	0.5	-1
35852441	Rare variant screening and burden analysis of PLXNA1 in Parkinson's disease	Li C	Eur J Neurol	2022	0	0	-1
36910591	Mendelian Disorders in an Interstitial Cystitis/Bladder Pain Syndrome Cohort	Estrella E	Adv Genet (Hoboken)	2022	0	0	-1
35996014	Association of rare PPARGC1A variants with Parkinson's disease risk	Li LZ	J Hum Genet	2022	0	0	-1
36305379	Gene-based burden analysis of damaging private variants in PRKN, PARK7 and PINK1 in Parkinson's disease cohorts of European descent	Hu J	Neurobiol Aging	2022	0	0	-1
35623891	Investigating the Genetic Characteristics of Hippocampal Volume and Plasma β-Amyloid in a Chinese Community-Dwelling Population	Yang XZ	Neurology	2022	0	0	-1
35460704	Whole-exome sequencing reveals damaging gene variants associated with hypoalphalipoproteinemia	Dong W	J Lipid Res	2022	1	0.5	-1
35101074	Novel insights into PORCN mutations, associated phenotypes and pathophysiological aspects	Arlt A	Orphanet J Rare Dis	2022	1	0.5	-1
36480544	Disruption of the HIF-1 pathway in individuals with Ollier disease and Maffucci syndrome	Poll SR	PLoS Genet	2022	1	0.5	-1
34635350	Low-frequency and rare coding variants of NUS1 contribute to susceptibility and phenotype of Parkinson's disease	Jiang L	Neurobiol Aging	2022	1	0.5	-1
36052737	Analysis of genetic profiling, pathomics signature, and prognostic features of primary lymphoepithelioma-like carcinoma of the renal pelvis	Fan B	Mol Oncol	2022	1	0.5	-1
34983594	Impact of achondroplasia on Latin American patients: a systematic review and meta-analysis of observational studies	Fano V	Orphanet J Rare Dis	2022	0	0	-1
35762214	Rare germline variants in PALB2 and BRCA2 in familial and sporadic chordoma	Xia B	Hum Mutat	2022	2	1	-1
35229241	Frequency of carriers for rare metabolic diseases in a Brazilian cohort of 320 patients	Quaio CRAC	Mol Biol Rep	2022	2	1	-1
36588761	Mosaic Variegated Aneuploidy Syndrome and Noonan Syndrome in the Same Family	Hübner CT	Mol Syndromol	2022	0	0	-1
36372767	[Susceptibility study on the germline rare variants of bromodomain and extraterminal domain protein family-encoding genes and patients with cancer living in some regions of China]	Huang Y	Zhonghua Yi Xue Za Zhi	2022	0	0	-1
35339647	Alternative RNA splicing defects in pediatric cancers: new insights in tumorigenesis and potential therapeutic vulnerabilities	Venkataramany AS	Ann Oncol	2022	8	4	0	Not coding variant associations
35026164	The genetic architecture of pediatric cardiomyopathy	Ware SM	Am J Hum Genet	2022	8	4	2	Not gene-level associations
35618891	Host genetic basis of COVID-19: from methodologies to genes	Zguro K	Eur J Hum Genet	2022	8	4	2	Method or review paper
27956748	Association of rare missense variants in the second intracellular loop of Na(V)1.7 sodium channels with familial autism	Rubinstein M	Mol Psychiatry	2018	21	3.5	1
29177435	De novo mutations implicate novel genes in systemic lupus erythematosus	Pullabhatla V	Hum Mol Genet	2018	23	3.8	1
35301265	A general framework for identifying oligogenic combinations of rare variants in complex disorders	Pounraja VK	Genome Res	2022	9	4.5	0	Method or review paper
34743040	Whole exome sequencing reveals potentially pathogenic variants in a small subset of premenopausal women with idiopathic osteoporosis	Cohen A	Bone	2022	9	4.5	2	Not gene-level associations
36062811	Generalized pustular psoriasis is a disease distinct from psoriasis vulgaris: evidence and expert opinion	Bachelez H	Expert Rev Clin Immunol	2022	8	4	0	Not coding variant associations
29915322	Rare germline variants in DNA repair genes and the angiogenesis pathway predispose prostate cancer patients to develop metastatic disease	Mijuskovic M	Br J Cancer	2018	24	4	1
29706360	Whole-Exome Sequencing in Age-Related Macular Degeneration Identifies Rare Variants in COL8A1, a Component of Bruch's Membrane	Corominas J	Ophthalmology	2018	24	4	1
34927673	Forecasting stroke-like episodes and outcomes in mitochondrial disease	Ng YS	Brain	2022	16	8	0	Not coding variant associations
35546631	Genome-wide tandem repeat expansions contribute to schizophrenia risk	Mojarad BA	Mol Psychiatry	2022	11	5.5	0	Not coding variant associations
30256453	Rare genetic variation in mitochondrial pathways influences the risk for Parkinson's disease	Gaare JJ	Mov Disord	2018	24	4	1
35563100	Beyond BRCA: The Emerging Significance of DNA Damage Response and Personalized Treatment in Pancreatic and Prostate Cancer Patients	Dalmasso B	Int J Mol Sci	2022	10	5	0	Not coding variant associations
29669943	Whole-exome sequencing uncovers oxidoreductases DHTKD1 and OGDHL as linkers between mitochondrial dysfunction and eosinophilic esophagitis	Sherrill JD	JCI Insight	2018	25	4.2	1
28630456	Rare disruptive variants in the DISC1 Interactome and Regulome: association with cognitive ability and schizophrenia	Teng S	Mol Psychiatry	2018	25	4.2	1
34002022	Environmental exposures associated with elevated risk for autism spectrum disorder may augment the burden of deleterious de novo mutations among probands	Pugsley K	Mol Psychiatry	2022	16	8	0	Not coding variant associations
29074453	Exome-Wide Association Study of Pancreatic Cancer Risk	Grant RC	Gastroenterology	2018	29	4.8	1
35294868	Drosophila functional screening of de novo variants in autism uncovers damaging variants and facilitates discovery of rare neurodevelopmental diseases	Marcogliese PC	Cell Rep	2022	13	6.5	2	Not coding variant associations
35819174	Burden of rare variants in arrhythmogenic cardiomyopathy with right dominant form-associated genes provides new insights for molecular diagnosis and clinical management	Goudal A	Hum Mutat	2022	1	0.5	-1
36112662	Testing for association with rare variants in the coding and non-coding genome: RAVA-FIRST, a new approach based on CADD deleteriousness score	Bocher O	PLoS Genet	2022	1	0.5	-1
35715682	Genetic Analysis of HSP40/DNAJ Family Genes in Parkinson's Disease: a Large Case-Control Study	Zhang K	Mol Neurobiol	2022	0	0	-1
34752814	Combining whole exome sequencing with in silico analysis and clinical data to identify candidate variants in pediatric left ventricular noncompaction	Collyer J	Int J Cardiol	2022	1	0.5	-1
35053440	Canine Oral Melanoma Genomic and Transcriptomic Study Defines Two Molecular Subgroups with Different Therapeutical Targets	Prouteau A	Cancers (Basel)	2022	1	0.5	-1
36672821	The Variant p.Ala84Pro Is Causative of X-Linked Hypophosphatemic Rickets: Possible Relationship with Burosumab Swinging Response in Adults	Zagari MC	Genes (Basel)	2022	1	0.5	-1
36031890	TREM2 Gene Compound Heterozygosity in Neurodegenerative Disorders	Berdyński M	J Alzheimers Dis	2022	0	0	-1
35171267	Genetic analysis for type 1 diabetes genes in juvenile dermatomyositis unveils genetic disease overlap	Qu HQ	Rheumatology (Oxford)	2022	1	0.5	-1
35524249	Burden of rare coding variants reveals genetic heterogeneity between obese and non-obese asthma patients in the African American population	Liu Y	Respir Res	2022	1	0.5	-1
34748893	A simple clinical score to promote and enhance ferroportin disease screening	Landemaine A	J Hepatol	2022	1	0.5	-1
35464305	Association Study of TAF1 Variants in Parkinson's Disease	Zeng Q	Front Neurosci	2022	1	0.5	-1
35893298	Functional Independence of Taiwanese Children with Osteogenesis Imperfecta	Syu YM	J Pers Med	2022	1	0.5	-1
36216875	Investigating the role of common and rare variants in multiplex multiple sclerosis families reveals an increased burden of common risk variation	Everest E	Sci Rep	2022	1	0.5	-1
35583931	Exploring the Genetic Architecture of Spontaneous Coronary Artery Dissection Using Whole-Genome Sequencing	Tarr I	Circ Genom Precis Med	2022	11	5.5	2	Not gene-level associations
33632708	Hepatobiliary phenotypes of adults with alpha-1 antitrypsin deficiency	Fromme M	Gut	2022	11	5.5	0	Not coding variant associations
34716721	Natural History of Leigh Syndrome: A Study of Disease Burden and Progression	Lim AZ	Ann Neurol	2022	9	4.5	0	Method or review paper
35797970	SLIT2 Rare Sequencing Variants Identified in Idiopathic Hypogonadotropic Hypogonadism	Wu J	Horm Res Paediatr	2022	0	0	-1
36107454	Sadler B, Christopherson PA, Haller G, Montgomery RR, Di Paola J; Zimmerman Program Investigators. von Willebrand factor antigen levels are associated with burden of rare nonsynonymous variants in the VWF gene. Blood. 2021;137(23):3277-3283		Blood	2022	0	0	-1
36117360	[Family-based association tests for rare variants]	Chen X	Zhonghua Liu Xing Bing Xue Za Zhi	2022	0	0	-1
36147510	Genomic study of nonsyndromic hearing loss in unaffected individuals: Frequency of pathogenic and likely pathogenic variants in a Brazilian cohort of 2,097 genomes	Quaio CRAC	Front Genet	2022	0	0	-1
30377230	Genetic Analysis of 400 Patients Refines Understanding and Implicates a New Gene in Atypical Hemolytic Uremic Syndrome	Bu F	J Am Soc Nephrol	2018	29	4.8	1
36660619	Association of rare RNF213 variants and intracranial aneurysm risk in a Chinese population	Li Y	Ann Transl Med	2022	0	0	-1
36042399	A comprehensive comparison of multilocus association methods with summary statistics in genome-wide association studies	Shao Z	BMC Bioinformatics	2022	1	0.5	-1
35629155	Signal-to-Noise Analysis Can Inform the Likelihood That Incidentally Identified Variants in Sarcomeric Genes Are Associated with Pediatric Cardiomyopathy	Kurzlechner LM	J Pers Med	2022	1	0.5	-1
36498562	Targeted Resequencing of Otosclerosis Patients from Different Populations Replicates Results from a Previous Genome-Wide Association Study	Tavernier LJM	J Clin Med	2022	1	0.5	-1
34623748	D-bifunctional protein deficiency caused by splicing variants in a neonate with severe peroxisomal dysfunction and persistent hypoglycemia	Werner KM	Am J Med Genet A	2022	0	0	-1
34837083	Deep learning enables genetic analysis of the human thoracic aorta	Pirruccello JP	Nat Genet	2022	45	22.5	0	Method or review paper
35504296	[Burden of Affected Persons with MRKH Syndrome: Effect of an Intervention to Support Surgical Neovaginal Placement]	Schäffeler N	Psychother Psychosom Med Psychol	2022	0	0	-1
36137075	The impact of Mendelian sleep and circadian genetic variants in a population setting	Weedon MN	PLoS Genet	2022	1	0.5	-1
34463147	Two Components of Variant Profiles in Primary Vaginal Carcinosarcoma via Next-Generation Sequencing and a Literature Review	Kotoku R	Int J Surg Pathol	2022	1	0.5	-1
34427956	Recurrent NF1 gene variants and their genotype/phenotype correlations in patients with Neurofibromatosis type I	Riva M	Genes Chromosomes Cancer	2022	1	0.5	-1
36175824	Investigating a Genetic Link Between Alzheimer's Disease and CADASIL-Related Cerebral Small Vessel Disease	Dunn PJ	Mol Neurobiol	2022	1	0.5	-1
33846556	Whole-exome sequencing with targeted analysis and epilepsy after acute symptomatic neonatal seizures	Numis AL	Pediatr Res	2022	4	2	-1
35764069	Can Non-Coding NR5A1 Gene Variants Explain Phenotypes of Disorders of Sex Development?	Fabbri-Scallet H	Sex Dev	2022	3	1.5	-1
30448225	Next-generation sequencing identifies novel genes with rare variants in total anomalous pulmonary venous connection	Shi X	EBioMedicine	2018	47	7.8	1
29861106	Quantifying the Impact of Rare and Ultra-rare Coding Variation across the Phenotypic Spectrum	Ganna A	Am J Hum Genet	2018	59	9.8	1
35806091	Cathepsin B p.Gly284Val Variant in Parkinson's Disease Pathogenesis	Milanowski LM	Int J Mol Sci	2022	3	1.5	-1
35085295	Family-based whole-exome sequencing identifies rare variants potentially related to cutaneous melanoma predisposition in Brazilian melanoma-prone families	Fidalgo F	PLoS One	2022	3	1.5	-1
35434450	Genetic Analysis in a Familial Case With High Bone Mineral Density Suggests Additive Effects at Two Loci	Mart√≠nez-Gil N	JBMR Plus	2022	1	0.5	-1
36037157	Whole exome sequencing of high-risk neuroblastoma identifies novel non-synonymous variants	Przyby≈Ça W	PLoS One	2022	1	0.5	-1
34849577	Focused goodness of fit tests for gene set analyses	Zhang M	Brief Bioinform	2022	0	0	-1
35227461	PDZD8 Disruption Causes Cognitive Impairment in Humans, Mice, and Fruit Flies	Al-Amri AH	Biol Psychiatry	2022	6	3	2	Not coding variant associations
36184273	Familial Clustering and Genetic Analysis of Severe Thumb Carpometacarpal Joint Osteoarthritis in a Large Statewide Cohort	Gavile CM	J Hand Surg Am	2022	0	0	-1
30009200	Whole-exome sequencing in 20,197 persons for rare variants in Alzheimer's disease	Raghavan NS	Ann Clin Transl Neurol	2018	60	10	1
36922933	Whole-exome Sequencing of Nigerian Prostate Tumors from the Prostate Cancer Transatlantic Consortium (CaPTC) Reveals DNA Repair Genes Associated with African Ancestry	White JA	Cancer Res Commun	2022	4	2	-1
36439024	A Random Forest Genomic Classifier for Tumor Agnostic Prediction of Response to Anti-PD1 Immunotherapy	Bigelow E	Cancer Inform	2022	1	0.5	-1
36241656	Next-generation whole exome sequencing to delineate the genetic basis of primary congenital glaucoma	Rauf B	Sci Rep	2022	2	1	-1
36395956	Integrative analysis of multiomics data identifies selenium-related gene ALAD associating with keshan disease	Huang J	Free Radic Biol Med	2022	1	0.5	-1
35032048	Association of ultra-rare coding variants with genetic generalized epilepsy: A case-control whole exome sequencing study	Koko M	Epilepsia	2022	2	1	-1
35736394	Pharmacogenomic study of heart failure and candesartan response from the CHARM programme	Dub√© MP	ESC Heart Fail	2022	1	0.5	-1
36451215	Lack of association of TP73 rare variants with amyotrophic lateral sclerosis in a Chinese cohort	Li C	Hum Genomics	2022	1	0.5	-1
35394676	Uncovering variable neoplasms between ATM protein-truncating and common missense variants using 394‚Äâ694 UK Biobank exomes	Jiang X	Genes Chromosomes Cancer	2022	1	0.5	-1
35642252	Mutation Screening of TFG in Œ±-Synucleinopathy and Amyotrophic Lateral Sclerosis	Li C	Mov Disord	2022	1	0.5	-1
35197637	Genetic associations of protein-coding variants in human disease	Sun BB	Nature	2022	38	19	2	Not gene-level associations
30029678	Rare variants in SOX17 are associated with pulmonary arterial hypertension with congenital heart disease	Zhu N	Genome Med	2018	63	10.5	1
34272501	Genomic frontiers in congenital heart disease	Morton SU	Nat Rev Cardiol	2022	52	26	2	Method or review paper
35665752	Association of protein function-altering variants with cardiometabolic traits: the strong heart study	Shan Y	Sci Rep	2022	0	0	-1
35384631	Transethnic meta-analysis of exome-wide variants identifies new loci associated with male-specific metabolic syndrome	Lee HS	Genes Genomics	2022	0	0	-1
35811452	Analysis of ACE2 and TMPRSS2 coding variants as a risk factor for SARS-CoV-2 from 946 whole-exome sequencing data in the Turkish population	Duman N	J Med Virol	2022	5	2.5	2	Not gene-level associations
35234813	Fibrillar Collagen Variants in Spontaneous Coronary Artery Dissection	Zekavat SM	JAMA Cardiol	2022	9	4.5	2	Not gene-level associations
29955173	Project MinE: study design and pilot analyses of a large-scale whole-genome sequencing study in amyotrophic lateral sclerosis	Project MinE ALS Sequencing Consortium	Eur J Hum Genet	2018	73	12.2	1
37577582	BAC Transgenic Expression of Human TREM2-R47H Remodels Amyloid Plaques but Unable to Reprogram Plaque-associated Microglial Reactivity in 5xFAD Mice	Lee CYD	bioRxiv	2023	0	0	-1
37427135	Sustained complete response to first-line immunochemotherapy for highly aggressive TP53/MDM2-mutated upper tract urothelial carcinoma with ERBB2 mutations, luminal immune-infiltrated contexture, and non-mesenchymal state: a case report and literature review	Xu T	Front Oncol	2023	0	0	-1
36806579	Genetic background of idiopathic neurodevelopmental delay patients with significant brain deviation volume	Chen X	Chin Med J (Engl)	2023	0	0	-1
37717923	Nested and Large Nested Subtypes of Urothelial Carcinoma of the Upper Urinary Tract: A Multi-institutional Study	Aron M	Mod Pathol	2023	0	0	-1
30269813	Burden Testing of Rare Variants Identified through Exome Sequencing via Publicly Available Control Data	Guo MH	Am J Hum Genet	2018	76	12.7	1
36959829	Construction of copy number variation landscape and characterization of associated genes in a Bangladeshi cohort of neurodevelopmental disorders	Akter H	Front Genet	2023	3	3	0	Copy number variants
36672886	Report of Hermansky-Pudlak Syndrome in Two Families with Novel Variants in HPS3 and HPS4 Genes	Zaman Q	Genes (Basel)	2023	3	3	2	Not coding variant associations
37492104	Multi-layered genetic approaches to identify approved drug targets	Sadler MC	Cell Genom	2023	3	3	0	Method or review paper
36286845	Common Germline Risk Variants Impact Somatic Alterations and Clinical Features across Cancers	Namba S	Cancer Res	2023	3	3	2	Not coding variant associations
37961530	Rare Genomic Copy Number Variants Implicate New Candidate Genes for Bicuspid Aortic Valve	Carlisle SG	medRxiv	2023	0	0	-1
29566793	Genome-wide Analyses Identify KIF5A as a Novel ALS Gene	Nicolas A	Neuron	2018	311	51.8	1
29378355	A Genome-wide Study of Common and Rare Genetic Variants Associated with Circulating Thrombin Activatable Fibrinolysis Inhibitor			2018	7	3.5	1	Additional curation
37786694	Adaptation of a Mutual Exclusivity Framework to Identify Driver Mutations within Biological Pathways	Wang X	bioRxiv	2023	0	0	-1
37884687	Rare variants with large effects provide functional insights into the pathology of migraine subtypes, with and without aura	Bjornsdottir G	Nat Genet	2023	0	0	-1
37801072	Pathogenic variants in the Longitudinal Early-onset Alzheimer's Disease Study cohort	Nudelman KNH	Alzheimers Dement	2023	0	0	-1
37865391	A Protective Role of Low Polygenic Risk Score in Healthy Individuals Carrying Attention-Deficit/Hyperactivity Disorder-Associated Copy Number Variations	Chang X	Biol Psychiatry	2023	0	0	-1
37379307	Gene and pathway based burden analyses in familial lymphoid cancer cases: Rare variants in immune pathway genes	Ralli S	PLoS One	2023	0	0	-1
37033978	Immune profiles according to EGFR mutant subtypes and correlation with PD-1/PD-L1 inhibitor therapies in lung adenocarcinoma	Koh YW	Front Immunol	2023	0	0	-1
37746257	Case Report: Cancer spectrum and genetic characteristics of a de novo germline POLD1 p.L606M variant-induced polyposis syndrome	Zhang Y	Front Oncol	2023	0	0	-1
37301973	Experience in prenatal genetic testing and reproductive decision-making for monogenic disorders from a single tertiary care genetics clinic in a low-middle income country	Hanif A	BMC Pregnancy Childbirth	2023	0	0	-1
36998041	Epithelioid and spindle rhabdomyosarcoma with TFCP2 rearrangement in abdominal wall: a distinctive entity with poor prognosis	Li Y	Diagn Pathol	2023	0	0	-1
28973304	Exome-wide association study reveals novel psoriasis susceptibility locus at TNFSF15 and rare protective alleles in genes contributing to type I IFN signalling	Dand N	Hum Mol Genet	2017	18	2.6	1
37012328	The genetic landscape and clinical implication of pediatric Moyamoya angiopathy in an international cohort	Zanoni P	Eur J Hum Genet	2023	3	3	2	Not coding variant associations
28854705	Whole-genome sequencing study of serum peptide levels: the Atherosclerosis Risk in Communities study	de Vries PS	Hum Mol Genet	2017	18	2.6	1
37223472	SARS-CoV-2 RBD and Its Variants Can Induce Platelet Activation and Clearance: Implications for Antibody Therapy and Vaccinations against COVID-19	Ma X	Research (Wash D C)	2023	3	3	0	Not coding variant associations
36922864	Lifetime impact of achondroplasia study in Europe (LIAISE): findings from a multinational observational study	Maghnie M	Orphanet J Rare Dis	2023	3	3	0	Not coding variant associations
35274909	Identification and functional characterization of two rare LDLR stop gain variants (p.C231* and p.R744*) in Saudi familial hypercholesterolemia patients	Awan Z	Panminerva Med	2023	3	3	0	Not gene-level associations
29522175	Rare Variant, Gene-Based Association Study of Hereditary Melanoma Using Whole-Exome Sequencing	Artomov M	J Natl Cancer Inst	2017	18	2.6	1
36448629	Like going into a chocolate shop, blindfolded': What do people with primary progressive aphasia want from speech and language therapy?	Loizidou M	Int J Lang Commun Disord	2023	3	3	0	Not coding variant associations
38196618	Rare disease gene association discovery from burden analysis of the 100,000 Genomes Project data	Cipriani V	medRxiv	2023	0	0	-1
36786913	Whole Exome Sequencing of Hemiplegic Migraine Patients Shows an Increased Burden of Missense Variants in CACNA1H and CACNA1I Genes	Maksemous N	Mol Neurobiol	2023	0	0	-1
38118020	Obesity variants in the GIPR gene do not associate with risk of fracture or bone mineral density	Styrkarsdottir U	J Clin Endocrinol Metab	2023	0	0	-1
37461573	Exome-wide evidence of compound heterozygous effects across common phenotypes in the UK Biobank	Lassen FH	medRxiv	2023	0	0	-1
37589150	Cardiomyopathy in Asian Cohorts: Genetic and Epigenetic Insights	Tan K	Circ Genom Precis Med	2023	0	0	-1
36879001	Identification of putative regulatory single-nucleotide variants in NTN1 gene associated with NSCL/P	Tao HX	J Hum Genet	2023	0	0	-1
37569495	Challenges of Diagnosing Mendelian Susceptibility to Mycobacterial Diseases in South Africa	Scholtz D	Int J Mol Sci	2023	0	0	-1
37026832	Successful treatment of rare linear lichen planopilaris with Ixekizumab	Ahmed H	J Dermatolog Treat	2023	0	0	-1
37270618	Delta weight loss unlike genetic variation associates with hyperoxaluria after malabsorptive bariatric surgery	Scherer L	Sci Rep	2023	0	0	-1
37161864	Poison exon annotations improve the yield of clinically relevant variants in genomic diagnostic testing	Felker SA	Genet Med	2023	0	0	-1
28678401	Assessing the spectrum of germline variation in Fanconi anemia genes among patients with head and neck carcinoma before age 50	Chandrasekharappa SC	Cancer	2017	19	2.7	1
37719435	High-Throughput Microscopy Characterization of Rare LDLR Variants	Graça R	JACC Basic Transl Sci	2023	2	2	2	Not coding variant associations
28117402	Whole-exome sequencing of 228 patients with sporadic Parkinson's disease	Sandor C	Sci Rep	2017	19	2.7	1
36947458	Germline pathogenic variants in patients with early-onset neuroendocrine neoplasms	Riechelmann RP	Endocr Relat Cancer	2023	2	2	3	Can't access
36993720	A novel SMARCC1 -mutant BAFopathy implicates epigenetic dysregulation of neural progenitors in hydrocephalus	Singh AK	medRxiv	2023	0	0	-1
37944567	Gene-based association study of rare variants in children of diverse ancestries implicates TNFRSF21 in the development of allergic asthma	Clay S	J Allergy Clin Immunol	2023	0	0	-1
37292616	Assortative mating and parental genetic relatedness drive the pathogenicity of variably expressive variants	Smolen C	medRxiv	2023	0	0	-1
38254912	Rare Deletions or Large Duplications Contribute to Genetic Variation in Patients with Severe Tinnitus and Meniere Disease	Escalera-Balsera A	Genes (Basel)	2023	0	0	-1
38096369	Low-frequency inherited complement receptor variants are associated with purpura fulminans	Bendapudi PK	Blood	2023	0	0	-1
28425186	Association studies of low-frequency coding variants in nonsyndromic cleft lip with or without cleft palate	Leslie EJ	Am J Med Genet A	2017	21	3	1
37398424	Bayesian estimation of gene constraint from an evolutionary model with gene features	Zeng T	Res Sq	2023	0	0	-1
37333357	Trans-ancestral genetic study of diabetes mellitus risk in survivors of childhood cancer: a report from the St. Jude Lifetime Cohort and the Childhood Cancer Survivor Study	Im C	medRxiv	2023	0	0	-1
36845387	Evaluation of genetic alterations in hereditary cancer susceptibility genes in the Ashkenazi Jewish women community of Mexico	Díaz-Velásquez CE	Front Genet	2023	0	0	-1
37409478	DiscoVari: A Web-Based Precision Medicine Tool for Predicting Variant Pathogenicity in Cardiomyopathy- and Channelopathy-Associated Genes	Kurzlechner LM	Circ Genom Precis Med	2023	0	0	-1
36706306	Utility of Whole Exome Sequencing in the Early Diagnosis of Atypical Diamond-Blackfan Anemia	Al-Mulla A	J Pediatr Hematol Oncol	2023	0	0	-1
37079518	Rare CIDEC coding variants enriched in age-related macular degeneration patients with small low-luminance deficit cause lipid droplet and fat storage defects	Kim S	PLoS One	2023	0	0	-1
37124138	Rare variant enrichment analysis supports GREB1L as a contributory driver gene in the etiology of Mayer-Rokitansky-Küster-Hauser syndrome	Jolly A	HGG Adv	2023	0	0	-1
38006880	Improved detection of aberrant splicing with FRASER 2.0 and the intron Jaccard index	Scheller IF	Am J Hum Genet	2023	0	0	-1
37440426	Exploring the rare variants associated with Type 2 Diabetes Mellitus in Indian population and its disease-drug association studies: an in-silico approach	Shelake G	J Biomol Struct Dyn	2023	0	0	-1
37482044	HPV-associated oropharyngeal Adenosquamous carcinoma with early metastatic disease detected by ctDNA	Newman S	Oral Oncol	2023	0	0	-1
36685950	Case report: Therapy adherence, MTTP variants, and course of atheroma in two patients with HoFH on low-dose, long-term lomitapide therapy	Kayikcioglu M	Front Genet	2023	0	0	-1
37444464	Identification of Genetic Risk Factors for Keratinocyte Cancer in Immunosuppressed Solid Organ Transplant Recipients: A Case-Control Study	Sunder-Plassmann R	Cancers (Basel)	2023	0	0	-1
37199186	Genetic Burden of TNNI3K in Diagnostic Testing of Patients With Dilated Cardiomyopathy and Supraventricular Arrhythmias	Pham C	Circ Genom Precis Med	2023	0	0	-1
37369012	Metabolic liver cancer: associations of rare and common germline variants in one-carbon metabolism and DNA methylation genes	Antwi SO	Hum Mol Genet	2023	0	0	-1
36000269	Differences in set-based tests for sparse alternatives when testing sets of outcomes compared to sets of explanatory factors in genetic association studies	Sun R	Biostatistics	2023	0	0	-1
37503172	Common- and rare-variant genetic architecture of heart failure across the allele frequency spectrum	Lee DSM	medRxiv	2023	0	0	-1
37063688	Hereditary pulmonary arterial hypertension burden in pediatrics: A single referral center experience	Ishizuka M	Front Pediatr	2023	0	0	-1
37422595	Exonic mutations in cell-cell adhesion may contribute to CADASIL-related CSVD pathology	Dunn PJ	Hum Genet	2023	0	0	-1
37377439	Comparison of cardiac involvement, extracardiac manifestations and outcomes between homozygote and heterozygote transthyretin p.Val142Ile (V122I) variant in patients with hereditary transthyretin amyloidosis: a cohort study	Albenque G	Amyloid	2023	0	0	-1
37126018	Cytochrome P450 Oxidoreductase (POR) Associated with Severe Paclitaxel-Induced Peripheral Neuropathy in Patients of European Ancestry from ECOG-ACRIN E5103	Shen F	Clin Cancer Res	2023	2	2	0	Not coding variant associations
36414227	Risk factors for clonal hematopoiesis of indeterminate potential and mosaic chromosomal alterations	Jakubek YA	Transl Res	2023	3	3	2	Method or review paper
36686738	Molecular profiling of male breast cancer by multigene panel testing: Implications for precision oncology	Valentini V	Front Oncol	2023	3	3	2	Not gene-level associations
37337559	Innovations in the Treatment of Dystrophic Epidermolysis Bullosa (DEB): Current Landscape and Prospects	Hou PC	Ther Clin Risk Manag	2023	3	3	0	Method or review paper
37153444	Ultra-rare complement factor 8 coding variants in families with age-related macular degeneration	Zelinger L	iScience	2023	2	2	2	Not coding variant associations
36349687	Identifying causal serum protein-cardiometabolic trait relationships using whole genome sequencing	Png G	Hum Mol Genet	2023	3	3	2	Not coding variant associations
36653860	Dermatofibrosarcoma protuberans challenges: a case series and review of the literature	Sheidaei S	J Med Case Rep	2023	2	2	0	Method or review paper
36831055	Molecular Targets in Salivary Gland Cancers: A Comprehensive Genomic Analysis of 118 Mucoepidermoid Carcinoma Tumors	Bou Zerdan M	Biomedicines	2023	2	2	2	Not coding variant associations
28709720	Burden of rare variants in ALS genes influences survival in familial and sporadic ALS	Pang SY	Neurobiol Aging	2017	25	3.6	1
38045317	Early-onset schizophrenia is associated with immune-related rare variants in a Chinese sample	Zhong Y	medRxiv	2023	0	0	-1
37891325	Novel, clinically relevant genomic patterns identified by comprehensive genomic profiling in ATRX-deficient IDH-wildtype adult high-grade gliomas	Bedics G	Sci Rep	2023	0	0	-1
36528236	Charting co-mutation patterns associated with actionable drivers in intrahepatic cholangiocarcinoma	Kendre G	J Hepatol	2023	15	15	2	Copy number variants
36656928	Heritable defects in telomere and mitotic function selectively predispose to sarcomas	Ballinger ML	Science	2023	9	9	0	Not coding variant associations
36434153	Lynch syndrome, molecular mechanisms and variant classification	Abildgaard AB	Br J Cancer	2023	5	5	0	Not coding variant associations
34583947	Molecular characterisation of pancreatic ductal adenocarcinoma with NTRK fusions and review of the literature	Allen MJ	J Clin Pathol	2023	6	6	2	Not coding variant associations
29036293	Rare germline variants in known melanoma susceptibility genes in familial melanoma	Goldstein AM	Hum Mol Genet	2017	27	3.9	1
28985224	Caspase-8, association with Alzheimer's Disease and functional analysis of rare variants	Rehker J	PLoS One	2017	27	3.9	1
28430856	A comprehensive analysis of rare genetic variation in amyotrophic lateral sclerosis in the UK	Morgan S	Brain	2017	31	4.4	1
36724206	A fast and efficient approach for gene-based association studies of ordinal phenotypes	Li N	Stat Appl Genet Mol Biol	2023	0	0	-1
36721205	Trem2 H157Y increases soluble TREM2 production and reduces amyloid pathology	Qiao W	Mol Neurodegener	2023	5	5	2	Not coding variant associations
37881554	Ultrarare Missense Variants Implicated in Utah Pedigrees Multiply Affected With Schizophrenia	Ormond C	Biol Psychiatry Glob Open Sci	2023	0	0	-1
37600057	Multifocal ectopic purkinje-related premature contractions and related cardiomyopathy	Calloe K	Front Cardiovasc Med	2023	0	0	-1
37350360	Sex differences in deleterious genetic variants in a haplodiploid social insect	Miller SE	Mol Ecol	2023	0	0	-1
37780999	Homozygous Mutations in Thyroid Peroxidase (TPO) in Hypothyroidism with Intellectual Disability, Developmental Delay, and Hearing and Ocular Anomalies in Two Families: Severe Manifestation of Untreated TPO-deficiency Poses a Diagnostic Dilemma	Naqvi SF	Yale J Biol Med	2023	0	0	-1
37873269	Rare variant analyses validate known ALS genes in a multi-ethnic population and identifies ANTXR2 as a candidate in PLS	Pottinger TD	medRxiv	2023	0	0	-1
38196621	Rare variant analyses validate known ALS genes in a multi-ethnic population and identifies ANTXR2 as a candidate in PLS	Pottinger TD	Res Sq	2023	0	0	-1
37215724	Rare variant burden analysis from exomes of three consanguineous families reveals LILRB1 and PRSS3 as potential key proteins in inflammatory bowel disease pathogenesis	Jan RM	Front Med (Lausanne)	2023	0	0	-1
37761846	Polygenic Risk Score and Rare Variant Burden Identified by Targeted Sequencing in a Group of Patients with Pigment Epithelial Detachment in Age-Related Macular Degeneration	Wąsowska A	Genes (Basel)	2023	0	0	-1
37167322	Identification of potentially pathogenic variants for autism spectrum disorders using gene-burden analysis	Rihar N	PLoS One	2023	0	0	-1
38196638	A deep learning transformer model predicts high rates of undiagnosed rare disease in large electronic health systems	Jordan DM	medRxiv	2023	0	0	-1
37739924	Ovarian squamous cell carcinoma associated with teratoma: a report of six cases with genomic analysis	Liang Y	Pathology	2023	0	0	-1
36655641	Yoga: A Natural Solution to Decrease Disease Burden in Children of MTHFR Deficient Parents	Borthakur D	Clin Ter	2023	0	0	-1
37968991	Hepatocellular Carcinomas with Concomitant Mutations of TERT, TP53, and CTNNB1: Is There a Role for Artificial Intelligence?	Chillotti S	Crit Rev Oncog	2023	0	0	-1
37679051	TSC2 inactivation, low mutation burden and high macrophage infiltration characterise hepatic angiomyolipomas	Giannikou K	Histopathology	2023	0	0	-1
37752895	Phenotypic Heterogeneity in Patients with Mutations in the Mitochondrial Complex I Assembly Gene NDUFAF5	Chen PS	Mov Disord	2023	0	0	-1
36837923	Machine Learning Methods Improve Specificity in Newborn Screening for Isovaleric Aciduria	Zaunseder E	Metabolites	2023	0	0	-1
38093364	Comprehensive assessment of the genetic characteristics of small for gestational age newborns in NICU: from diagnosis of genetic disorders to prediction of prognosis	Xiao H	Genome Med	2023	0	0	-1
37314680	Base Editing and Prime Editing: Potential Therapeutic Options for Rare and Common Diseases	Testa LC	BioDrugs	2023	0	0	-1
38164514	Whole exome sequencing reveals genetic landscape associated with left ventricular outflow tract obstruction in Chinese Han population	Geng Z	Front Genet	2023	0	0	-1
37658461	Interplay of Mendelian and polygenic risk factors in Arab breast cancer patients	Al-Jumaan M	Genome Med	2023	0	0	-1
37771589	Rare variants in complement system genes associate with endothelial damage after pediatric allogeneic hematopoietic stem cell transplantation	Leimi L	Front Immunol	2023	0	0	-1
37756314	Unraveling the role of non-coding rare variants in epilepsy	Girard A	PLoS One	2023	0	0	-1
36739645	Plasma glucosylsphingosine correlations with baseline disease burden and response to eliglustat in two clinical trials of previously untreated adults with Gaucher disease type 1	Peterschmitt MJ	Mol Genet Metab	2023	0	0	-1
37544465	Impact of age and telomere length on circulating T cells and rejection risk after lung transplantation for idiopathic pulmonary fibrosis	Snyder ME	J Heart Lung Transplant	2023	0	0	-1
37280243	Establishment and characterization of patient-derived xenograft of a rare pediatric anaplastic pleomorphic xanthoastrocytoma (PXA) bearing a CDC42SE2-BRAF fusion	Damayanti NP	Sci Rep	2023	0	0	-1
37775315	Pattern of Brain Parenchymal Damage Related to Cerebral Small Vessel Disease in Carriers of Rare NOTCH3 Variants	Liu ZY	Neurology	2023	0	0	-1
37693462	Spatial Distribution of Missense Variants within Complement Proteins Associates with Age Related Macular Degeneration	Grunin M	medRxiv	2023	0	0	-1
36622818	The Genetic Landscape of Familial Pulmonary Fibrosis	Liu Q	Am J Respir Crit Care Med	2023	4	4	3	Can't access
36853785	Unique Patterns of Heterogeneous Mismatch Repair Protein Expression in Colorectal Cancer Unveil Different Degrees of Tumor Mutational Burden and Distinct Tumor Microenvironment Features	Berrino E	Mod Pathol	2023	4	4	2	Not coding variant associations
36753687	Mutation Spectrum in Liquid Versus Solid Biopsies From Patients With Advanced Gastroenteropancreatic Neuroendocrine Carcinoma	Knappskog S	JCO Precis Oncol	2023	3	3	2	Not coding variant associations
28659821	Candidate Gene Resequencing in a Large Bicuspid Aortic Valve-Associated Thoracic Aortic Aneurysm Cohort: SMAD6 as an Important Contributor	Gillis E	Front Physiol	2017	49	7	1
36602798	Genomic Alterations and Tumor Mutation Burden in Merkel Cell Carcinoma	Brazel D	JAMA Netw Open	2023	3	3	2	Not coding variant associations
37643892	Genetic influences on epilepsy outcomes: A whole-exome sequencing and health care records data linkage study	Fonferko-Shadrach B	Epilepsia	2023	0	0	-1
36217304	The associations of APP, PSEN1, and PSEN2 genes with Alzheimer's disease: A large case-control study in Chinese population	Xiao X	CNS Neurosci Ther	2023	0	0	-1
37345498	On asymptotic distributions of several test statistics for familial relatedness in linear mixed models	Devogel N	Stat Med	2023	0	0	-1
37292653	Bayesian estimation of gene constraint from an evolutionary model with gene features	Zeng T	bioRxiv	2023	0	0	-1
36787015	Comparing SARS-CoV-2 variants among children and adolescents in Germany: relative risk of COVID-19-related hospitalization, ICU admission and mortality	Jank M	Infection	2023	4	4	2	Not coding variant associations
36711854	Poison exon annotations improve the yield of clinically relevant variants in genomic diagnostic testing	Felker SA	bioRxiv	2023	0	0	-1
36901733	Whole-Exome Sequencing and cfDNA Analysis Uncover Genetic Determinants of Melanoma Therapy Response in a Real-World Setting	Vanni I	Int J Mol Sci	2023	0	0	-1
36032980	Demographic and Viral-Genetic Analyses of COVID-19 Severity in Bahrain Identify Local Risk Factors and a Protective Effect of Polymerase Mutations	Koch EM	medRxiv	2023	0	0	-1
36778420	BARD1 germline variants induce haploinsufficiency and DNA repair defects in neuroblastoma	Randall MP	bioRxiv	2023	0	0	-1
37821546	The burden of splice-disrupting variants in inherited heart disease and unexplained sudden cardiac death	Singer ES	NPJ Genom Med	2023	0	0	-1
37338505	A pilot exome sequencing study suggests that germline variants influence methotrexate-induced toxicities in pediatric patients with localized osteosarcoma	Minnai F	Pediatr Blood Cancer	2023	0	0	-1
37292720	Genome-wide association study stratified by MAPT haplotypes identifies potential novel loci in Parkinson's disease	Senkevich K	medRxiv	2023	0	0	-1
38045990	Adult Phenotype of SYNGAP1-DEE	Rong M	Neurol Genet	2023	0	0	-1
38132069	A Panel-Agnostic Strategy 'HiPPo' Improves Diagnostic Efficiency in the UK Genomic Medicine Service	Seaby EG	Healthcare (Basel)	2023	0	0	-1
37667232	Pervasive under-dominance in gene expression underlying emergent growth trajectories in Arabidopsis thaliana hybrids	Yuan W	Genome Biol	2023	0	0	-1
37886683	Learning the kernel for rare variant genetic association test	Falk I	Front Genet	2023	0	0	-1
37292664	Ultra-Rare Genetic Variation in Relapsing Polychondritis: A Whole-Exome Sequencing Study	Luo Y	medRxiv	2023	0	0	-1
37188781	Resilience to autosomal dominant Alzheimer's disease in a Reelin-COLBOS heterozygous man	Lopera F	Nat Med	2023	21	21	2	Not coding variant associations
37870677	Rare DNAJC7 Variants May Play a Minor Role in Chinese Patients with ALS	Wang S	Mol Neurobiol	2023	0	0	-1
37566928	Advancing diagnosis and management of liver disease in adults through exome sequencing	Zheng M	EBioMedicine	2023	0	0	-1
36980803	Moyamoya Vasculopathy in Neurofibromatosis Type 1 Pediatric Patients: The Role of Rare Variants of RNF213	Ognibene M	Cancers (Basel)	2023	0	0	-1
37626618	Puzzling Out the Genetic Architecture of Endometriosis: Whole-Exome Sequencing and Novel Candidate Gene Identification in a Deeply Clinically Characterised Cohort	Santin A	Biomedicines	2023	0	0	-1
37239478	Whole Exome Sequencing Reveals Clustering of Variants of Known Vitiligo Genes in Multiplex Consanguineous Pakistani Families	Ishaq R	Genes (Basel)	2023	0	0	-1
37030591	Cohort-driven variant burden analysis and pathogenicity identification in monogenic autoinflammatory disorders	Chen X	J Allergy Clin Immunol	2023	0	0	-1
37830501	Identifying Rare Genetic Determinants for Improved Polygenic Risk Prediction of Bone Mineral Density and Fracture Risk	Lu T	J Bone Miner Res	2023	0	0	-1
37056996	A retrospective analysis of phosphatase catalytic subunit gene variants in patients with rare disorders identifies novel candidate neurodevelopmental disease genes	Lyulcheva-Bennett E	Front Cell Dev Biol	2023	0	0	-1
37686511	Whole Exome-Wide Association Identifies Rare Variants in GALNT9 Associated with Middle Eastern Papillary Thyroid Carcinoma Risk	Bu R	Cancers (Basel)	2023	0	0	-1
37205493	Rare penetrant mutations confer severe risk of common diseases	Fiziev P	medRxiv	2023	0	0	-1
37965377	Variations in gender identity and sexual orientation of university students	Yoshida T	Sex Med	2023	0	0	-1
37046398	Cross-Ethnic Variant Screening and Burden Analysis of PTPA in Parkinson's Disease	Li C	Mov Disord	2023	0	0	-1
36716120	ISO 15189 is a sufficient instrument to guarantee high-quality manufacture of laboratory developed tests for in-house-use conform requirements of the European In-Vitro-Diagnostics Regulation	Vanstapel FJLA	Clin Chem Lab Med	2023	5	5	0	Not coding variant associations
36586540	Constitutional Microsatellite Instability, Genotype, and Phenotype Correlations in Constitutional Mismatch Repair Deficiency	Gallon R	Gastroenterology	2023	4	4	0	Not coding variant associations
37968638	The role of admixture in the rare variant contribution to inflammatory bowel disease	Astore C	Genome Med	2023	1	1	2	Not gene-level associations
28067910	Exploring the genetic architecture of inflammatory bowel disease by whole-genome sequencing identifies association at ADCY7	Luo Y	Nat Genet	2017	74	10.6	1
28472652	De Novo Coding Variants Are Strongly Associated with Tourette Disorder	Willsey AJ	Neuron	2017	85	12.1	1
36376761	SCIP: software for efficient clinical interpretation of copy number variants detected by whole-genome sequencing	Ding Q	Hum Genet	2023	1	1	0	Method or review paper
37476022	CWH43 Variants Are Associated With Disease Risk and Clinical Phenotypic Measures in Patients With Normal Pressure Hydrocephalus	Tipton PW	Neurol Genet	2023	1	1	2	Not coding variant associations
37984997	A naturally occurring variant of MBD4 causes maternal germline hypermutation in primates	Stendahl AM	Genome Res	2023	1	1	0	Not gene-level associations
36984532	Congenital Proximal Radioulnar Synostosis in an Elite Athlete-Case Report	Chandoga I	Medicina (Kaunas)	2023	1	1	0	Method or review paper
29140481	Excessive burden of lysosomal storage disorder gene variants in Parkinson's disease	Robak LA	Brain	2017	188	26.9	1
27249223	Influence of Coding Variability in APP-Aβ Metabolism Genes in Sporadic Alzheimer's Disease	Sassi C	PLoS One	2016	20	2.5	1
37330543	Comprehensive genetic screening of early-onset dementia patients in an Austrian cohort-suggesting new disease-contributing genes	Silvaieh S	Hum Genomics	2023	1	1	2	Not coding variant associations
36933031	Mutation screening of AOPEP variants in a large dystonia cohort	Lin J	J Neurol	2023	1	1	3	Can't access
37745400	Improving the discovery of rare variants associated with alcohol problems by leveraging machine learning phenotype prediction and functional information	Ahangari M	bioRxiv	2023	0	0	-1
36747619	Germline pathogenic variants in 786 neuroblastoma patients	Kim J	medRxiv	2023	0	0	-1
37013170	Rare missense variants in the SH3 domain of PSTPIP1 are associated with hidradenitis suppurativa	Morales-Heil DJ	HGG Adv	2023	0	0	-1
27589997	Rare TREM2 variants associated with Alzheimer's disease display reduced cell surface expression	Sirkis DW	Acta Neuropathol Commun	2016	22	2.8	1
37988228	Strategies in Aggregation Tests for Rare Variants	Rajabli F	Curr Protoc	2023	0	0	-1
36980325	Identification of Genetic Alterations in Rapid Progressive Glioblastoma by Use of Whole Exome Sequencing	Khan I	Diagnostics (Basel)	2023	1	1	2	Not coding variant associations
36682278	New insights from a multi-ethnic Asian progressive supranuclear palsy cohort	Lim SY	Parkinsonism Relat Disord	2023	1	1	0	Method or review paper
37639628	The Role of ONECUT1 Variants in Monogenic and Type 2 Diabetes Mellitus	Russ-Silsby J	Diabetes	2023	1	1	3	Can't access
27732968	Charcot-Marie-Tooth gene, SBF2, associated with taxane-induced peripheral neuropathy in African Americans	Schneider BP	Oncotarget	2016	24	3	1
37860582	Molecular defects in primary ciliary dyskinesia are associated with agenesis of the frontal and sphenoid paranasal sinuses and chronic rhinosinusitis	Schramm A	Front Mol Biosci	2023	1	1	0	Not coding variant associations
36437134	Common and rare variants of EGF increase the genetic risk of Alzheimer's disease as revealed by targeted sequencing of growth factors in Han Chinese	Li X	Neurobiol Aging	2023	1	1	3	Can't access
36717479	Evaluating the Genetic Role of Circadian Clock Genes in Parkinson's Disease	Xiang Y	Mol Neurobiol	2023	0	0	-1
36908591	Evaluating the association between DNM1L variants and Parkinson's disease in the Chinese population	Liu J	Front Neurol	2023	0	0	-1
37491771	Rare sequence variants associated with the risk of non-syndromic biliary atresia	Tamaoka S	Hepatol Res	2023	0	0	-1
36849660	Exome-wide screening identifies novel rare risk variants for bone mineral density	He D	Osteoporos Int	2023	0	0	-1
37308910	Expanding genotype-phenotype correlations in FOXG1 syndrome: results from a patient registry	Brimble E	Orphanet J Rare Dis	2023	0	0	-1
37208429	Rare variant contribution to cholestatic liver disease in a South Asian population in the United Kingdom	Zöllner J	Sci Rep	2023	0	0	-1
37096745	Ezogabine impacts seizures and development in patients with KCNQ2 developmental and epileptic encephalopathy	Knight D	Epilepsia	2023	0	0	-1
37288276	Use of whole genome sequencing to determine the genetic basis of visceral myopathies including Prune Belly syndrome	Geraghty RM	J Rare Dis (Berlin)	2023	1	1	2	Not gene-level associations
37057597	A New Frontier for Cancer Genetics: Identification of Germline-Somatic Associations	Kar SP	Cancer Res	2023	1	1	0	Method or review paper
35246724	Response prediction in patients with gastric and esophagogastric adenocarcinoma under neoadjuvant chemotherapy using targeted gene expression analysis and next-generation sequencing in pre-therapeutic biopsies	Kleo K	J Cancer Res Clin Oncol	2023	1	1	0	Not coding variant associations
37799141	Prospect of genetic disorders in Saudi Arabia	Alqahtani AS	Front Genet	2023	1	1	0	Method or review paper
37207500	Whole exome sequencing of low grade serous ovarian carcinoma identifies genomic events associated with clinical outcome	Thomson JP	Gynecol Oncol	2023	1	1	2	Not coding variant associations
36752614	Genetic determinants of pancreatitis: relevance in severe hypertriglyceridemia	Hang SMT	Curr Opin Lipidol	2023	1	1	2	Method or review paper
37749167	ANO7 African-ancestral genomic diversity and advanced prostate cancer	Jiang J	Prostate Cancer Prostatic Dis	2023	1	1	2	Not gene-level associations
36743879	Pulmonary Artery Intimal Sarcoma in a Patient with Lynch Syndrome: Response to an Immune Checkpoint Inhibitor	Mounai Y	Case Rep Oncol	2023	1	1	0	Not coding variant associations
36586539	Contribution of genetic variants associated with primary immunodeficiencies to childhood-onset systemic lupus erythematous	Wu CY	J Allergy Clin Immunol	2023	1	1	2	Not gene-level associations
26658788	Rare Exome Sequence Variants in CLCN6 Reduce Blood Pressure Levels and Hypertension Risk	Yu B	Circ Cardiovasc Genet	2016	25	3.1	1
37488248	Transmission disequilibrium analysis of whole genome data in childhood-onset systemic lupus erythematosus	Vazzana KM	Genes Immun	2023	0	0	-1
37926674	Implementation of pre-emptive testing of a pharmacogenomic panel in clinical practice: Where do we stand?	Peruzzi E	Br J Clin Pharmacol	2023	0	0	-1
36973604	Whole-exome sequencing analyses in a Saudi Ischemic Stroke Cohort reveal association signals, and shows polygenic risk scores are related to Modified Rankin Scale Risk	Alkhamis FA	Funct Integr Genomics	2023	0	0	-1
36585449	The clinical utility of integrative genomics in childhood cancer extends beyond targetable mutations	Villani A	Nat Cancer	2023	18	18	2	Not coding variant associations
37227948	Cholesterol Contributes to Risk, Severity, and Machine Learning-Driven Diagnosis of Lyme Disease	Forrest IS	Clin Infect Dis	2023	0	0	-1
38075685	A pharmacogenetic study of perampanel: association between rare variants of glutamate receptor genes and outcomes	Lin CH	Front Genet	2023	0	0	-1
37235780	Rare Heterozygous Loss-of-Function Variants in the Human GLP-1 Receptor Are Not Associated With Cardiometabolic Phenotypes	Melchiorsen JU	J Clin Endocrinol Metab	2023	0	0	-1
37034758	Biochemical activity induced by a germline variation in KLK3 (PSA) associates with cellular function and clinical outcome in prostate cancer	Srinivasan S	Res Sq	2023	0	0	-1
37949852	A large meta-analysis identifies genes associated with anterior uveitis	Gelfman S	Nat Commun	2023	0	0	-1
36648520	Rare variants in IMPDH2 cause autosomal dominant dystonia in Chinese population	Lin J	J Neurol	2023	0	0	-1
27111861	Brief Report: Whole-Exome Sequencing for Identification of Potential Causal Variants for Diffuse Cutaneous Systemic Sclerosis	Mak AC	Arthritis Rheumatol	2016	27	3.4	1
37464730	Detecting disease association with rare variants using weighted entropy	Li YM	J Genet	2023	0	0	-1
36712083	Integrative Analysis of Germline Rare Variants in Clear and Non-Clear Cell Renal Cell Carcinoma	Han S	medRxiv	2023	0	0	-1
37304079	Genetic analysis of dystonia-related genes in Parkinson's disease	Wang Y	Front Aging Neurosci	2023	0	0	-1
37398180	Characterizing common and rare variations in non-traditional glycemic biomarkers using multivariate approaches on multi-ancestry ARIC study	Ray D	medRxiv	2023	0	0	-1
37272523	Rare neurovascular genetic and imaging markers across neurodegenerative diseases	Dilliott AA	Alzheimers Dement	2023	0	0	-1
37483484	Rare variants confer shared susceptibility to gastrointestinal tract cancer risk	Zheng J	Front Oncol	2023	0	0	-1
37746849	Mouse and human studies support DSTYK loss of function as a low-penetrance and variable expressivity risk factor for congenital urinary tract anomalies	Martino J	Genet Med	2023	0	0	-1
37974506	Rare variant association on unrelated individuals in case-control studies using aggregation tests: existing methods and current limitations	Boutry S	Brief Bioinform	2023	0	0	-1
37886469	Structural Variation Detection and Association Analysis of Whole-Genome-Sequence Data from 16,905 Alzheimer's Diseases Sequencing Project Subjects	Lee WP	Res Sq	2023	0	0	-1
37978175	Mutation of key signaling regulators of cerebrovascular development in vein of Galen malformations	Zhao S	Nat Commun	2023	0	0	-1
36702877	Genetic determinants and absence of breast cancer in Xavante Indians in Sangradouro Reserve, Brazil	Zhou Y	Sci Rep	2023	1	1	2	Not gene-level associations
27486782	Whole-Exome Sequencing Identifies Loci Associated with Blood Cell Traits and Reveals a Role for Alternative GFI1B Splice Variants in Human Hematopoiesis	Polfus LM	Am J Hum Genet	2016	27	3.4	1
35854043	Successful renal recovery from multiple myeloma-associated crystalline light chain cast nephropathy and accompanying acute kidney injury with early use of bortezomib-based therapy: a case report and literature review	Miki K	CEN Case Rep	2023	1	1	0	Method or review paper
36624280	Functional genomics provide key insights to improve the diagnostic yield of hereditary ataxia	Chen Z	Brain	2023	1	1	0	Not coding variant associations
36672911	Gathering the Stakeholder's Perspective: Experiences and Opportunities in Rare Genetic Disease Research	White LK	Genes (Basel)	2023	1	1	0	Method or review paper
27658901	TYROBP genetic variants in early-onset Alzheimer's disease	Pottier C	Neurobiol Aging	2016	39	4.9	1
37624372	Post-mortem genetic analysis of sudden unexplained death in a young cohort: a whole-exome sequencing study	Wang S	Int J Legal Med	2023	1	1	3	Can't access
26489027	Prioritization and burden analysis of rare variants in 208 candidate genes suggest they do not play a major role in CAKUT	Nicolaou N	Kidney Int	2016	39	4.9	1
27346685	Exome Genotyping Identifies Pleiotropic Variants Associated with Red Blood Cell Traits	Chami N	Am J Hum Genet	2016	43	5.4	1
37119015	Two novel homozygous variants of ATP6V0A2 and ALDH18A1 lead to autosomal recessive cutis laxa type 2 and 3 in two Pakistani families	Zaman Q	J Gene Med	2023	0	0	-1
37355153	Expanding the Clinicopathologic and Molecular Spectrum of Lipoblastoma-Like Tumor in a Series of 28 Cases	Anderson WJ	Mod Pathol	2023	0	0	-1
37745129	Case report: State-of-the-art risk-modifying treatment of sudden cardiac death in an asymptomatic patient with a mutation in the SCN5A gene and a review of the literature	Brlek P	Front Cardiovasc Med	2023	0	0	-1
37821990	The burden of mitochondrial disease with associated seizures: systematic literature reviews of health-related quality of life, utilities, costs and healthcare resource use data	Bertini E	Orphanet J Rare Dis	2023	0	0	-1
37107705	Contribution of LRP1 in Human Congenital Heart Disease Correlates with Its Roles in the Outflow Tract and Atrioventricular Cushion Development	Arrigo AB	Genes (Basel)	2023	0	0	-1
36993588	Genetic dysregulation of an endothelial Ras signaling network in vein of Galen malformations	Zhao S	bioRxiv	2023	0	0	-1
37259144	New insights in the genetic variant spectrum of SLC34A2 in pulmonary alveolar microlithiasis; a systematic review	Jönsson ÅLM	Orphanet J Rare Dis	2023	0	0	-1
36995132	Rare Single Nucleotide and Copy Number Variants and the Etiology of Congenital Obstructive Uropathy: Implications for Genetic Diagnosis	Ahram DF	J Am Soc Nephrol	2023	0	0	-1
36994199	An absolute approach to using whole exome DNA and RNA workflow for cancer biomarker testing	Malhotra R	Front Oncol	2023	0	0	-1
37941149	Genetics of human longevity: From variants to genes to pathways	Smulders L	J Intern Med	2023	0	0	-1
35614313	Genetics of bipolar disorder: insights into its complex architecture and biology from common and rare variants	Hara T	J Hum Genet	2023	2	2	2	Method or review paper
26951679	Whole-exome sequencing identifies MST1R as a genetic susceptibility gene in nasopharyngeal carcinoma	Dai W	Proc Natl Acad Sci U S A	2016	43	5.4	1
26566670	A polygenic burden of rare variants across extracellular matrix genes among individuals with adolescent idiopathic scoliosis	Haller G	Hum Mol Genet	2016	44	5.5	1
27120077	Exome Sequencing of Familial Bipolar Disorder	Goes FS	JAMA Psychiatry	2016	57	7.1	1
25796131	Genetic variability in SQSTM1 and risk of early-onset Alzheimer dementia: a European early-onset dementia consortium study	Cuyvers E	Neurobiol Aging	2015	23	2.6	1
25739334	Excess of rare variants in genes that are key epigenetic regulators of spermatogenesis in the patients with non-obstructive azoospermia	Li Z	Sci Rep	2015	25	2.8	1
25187575	Association of exome sequences with plasma C-reactive protein levels in >9000 participants	Schick UM	Hum Mol Genet	2015	26	2.9	1
26501415	Rare Variants in the Functional Domains of Complement Factor H Are Associated With Age-Related Macular Degeneration	Triebwasser MP	Invest Ophthalmol Vis Sci	2015	42	4.7	1
37246069	Germline Exome Sequencing for Men with Testicular Germ Cell Tumor Reveals Coding Defects in Chromosomal Segregation and Protein-targeting Genes	Pyle LC	Eur Urol	2023	1	1	3	Can't access
37719040	Gastric squamous cell carcinoma: A rare malignancy, literature review and management recommendations (Review)	De Lange G	Mol Clin Oncol	2023	1	1	0	Method or review paper
25650408	Testing the burden of rare variation in arrhythmia-susceptibility genes provides new insights into molecular diagnosis for Brugada syndrome	Le Scouarnec S	Hum Mol Genet	2015	56	6.2	1
36519629	Causes of preterm birth: Genetic factors in preterm birth and preterm infant phenotypes	Dauengauer-Kirlienė S	J Obstet Gynaecol Res	2023	0	0	-1
37207645	Monoallelic intragenic POU3F2 variants lead to neurodevelopmental delay and hyperphagic obesity, confirming the gene's candidacy in 6q16.1 deletions	Schönauer R	Am J Hum Genet	2023	1	1	2	Not coding variant associations
37745545	Structural Variation Detection and Association Analysis of Whole-Genome-Sequence Data from 16,905 Alzheimer's Diseases Sequencing Project Subjects	Wang H	medRxiv	2023	0	0	-1
36746884	NKX3.1 Expression and Molecular Characterization of Secretory Myoepithelial Carcinoma (SMCA): Advancing the Case for a Salivary Mucous Acinar Phenotype	Patel S	Head Neck Pathol	2023	1	1	2	Not coding variant associations
37645892	Carriers of rare damaging CCR2 genetic variants are at lower risk of atherosclerotic disease	Georgakis MK	medRxiv	2023	0	0	-1
37844295	A Rare Presentation of Aggressive Renal Cell Carcinoma and the Utility of Early Molecular Testing in Rapidly Progressing Malignancies: A Case Report	McLoughlin DE	Oncologist	2023	0	0	-1
36120833	MMP16 as NSCL ± P Susceptible Gene in Western Han Chinese	Lin Y	Cleft Palate Craniofac J	2023	0	0	-1
37034635	Rare genetic variants in SEC24D modify orofacial cleft phenotypes	Curtis SW	medRxiv	2023	0	0	-1
37034657	The impact of damaging epilepsy and cardiac genetic variant burden in sudden death in the young	Puckelwartz MJ	medRxiv	2023	0	0	-1
37219903	Barriers to Genetic Testing in Vascular Malformations	Borst AJ	JAMA Netw Open	2023	0	0	-1
37676273	Rare variant modifier analysis identifies variants in SEC24D associated with orofacial cleft subtypes	Curtis SW	Hum Genet	2023	0	0	-1
36695073	Analysis of dermoscopic changes of blue nevi on digital follow-up: A 21-year retrospective cohort study	Alamon-Reig F	J Eur Acad Dermatol Venereol	2023	0	0	-1
38089834	Current Molecular and Clinical Landscape of ATRT - The Link to Future Therapies	Gastberger K	Cancer Manag Res	2023	0	0	-1
37790589	Testing for pharmacogenomic predictors of ppRNFL thinning in individuals exposed to vigabatrin	Boothman I	Front Neurosci	2023	0	0	-1
36895957	Investigating genotype-phenotype relationship of extreme neuropathic pain disorders in a UK national cohort	Themistocleous AC	Brain Commun	2023	0	0	-1
37250922	Identification of Rare Variants Involved in High Myopia Unraveled by Whole Genome Sequencing	Haarman AEG	Ophthalmol Sci	2023	0	0	-1
38162683	Whole genome sequence analysis of apparent treatment resistant hypertension status in participants from the Trans-Omics for Precision Medicine program	Armstrong ND	Front Genet	2023	0	0	-1
36816019	Rare copy number variation analysis identifies disease-related variants in atrioventricular septal defect patients	Hu H	Front Genet	2023	1	1	0	Copy number variants
25691538	Role of common and rare variants in SCN10A: results from the Brugada syndrome QRS locus gene discovery collaborative study	Behr ER	Cardiovasc Res	2015	56	6.2	1
37078108	The sequence kernel association test for multicategorical outcomes	Jiang Z	Genet Epidemiol	2023	0	0	-1
38235404	Human stem cell modeling of neuropsychiatric disorders: from polygenicity to convergence	Duan J	Med Rev (2021)	2023	0	0	-1
37946254	The burden of rare variants in DPYS gene is a novel predictor of the risk of developing severe fluoropyrimidine-related toxicity	De Mattia E	Hum Genomics	2023	0	0	-1
38168271	Genomic diversity in functionally relevant genes modifies neurodevelopmental versus neoplastic risks in individuals with germline PTEN variants	Eng C	Res Sq	2023	0	0	-1
37745420	bamSliceR: cross-cohort variant and allelic bias analysis for rare variants and rare diseases	Huang YP	bioRxiv	2023	0	0	-1
37493001	Rare functional variants in the CRP and G6PC genes modify the relationship between obesity and serum C-reactive protein in white British population	Li X	Mol Genet Genomic Med	2023	0	0	-1
36746926	Common and rare variant associations with latent traits underlying depression, bipolar disorder, and schizophrenia	Dattani S	Transl Psychiatry	2023	0	0	-1
36960829	Spesolimab, an interleukin-36 receptor monoclonal antibody, for the treatment of generalized pustular psoriasis	Burden AD	Expert Rev Clin Immunol	2023	0	0	-1
37414395	Rare variants in the sodium-dependent phosphate transporter gene SLC34A3 explain missing heritability of urinary stone disease	Sadeghi-Alavijeh O	Kidney Int	2023	0	0	-1
[truncated: 120 more rows]

## Sheet: Table S2a
PMID	Original mask	Harmonized mask	Decision	MAF	Annotation	Annotation type	maxMAF threshold	Mask definition	Note
22135386	22135386_m1	22135386_m1	unqualified for analyses	maf1	Consequence	other	low-frequency	(coding | non_coding) & maf1
22521419	22521419_m1	22521419_m1	qualified for analyses	maf1	Consequence	misIndels	low-frequency	missense & maf1
22958901	22958901_m1	22958901_m1	qualified for analyses	maf1	Consequence	pLoFmis	low-frequency	(missense | stop_gained | indels | essential_splice) & maf1
23166334	23166334_m1	23166334_m1	unqualified for analyses	mac1	Polyphen2, SIFT	damMis	ultra rare	(missense & Polyphen2_HDIV_pred_D & Polyphen2_HVAR_pred_D & SIFT_pred_D & disease_specific) & mac1
23261300	23261300_m1	23261300_m1	qualified for analyses	maf1, mac0_gnomAD	Consequence	pLoFmis	ultra rare	(missense | stop_gained) & maf1 & mac0_gnomAD
23261300	23261300_m2	23261300_m2	qualified for analyses	maf5, mac0_gnomAD	Consequence	pLoFmis	ultra rare	(missense | stop_gained) & maf5 & mac0_gnomAD
23261300	23261300_m3	23261300_m3	unqualified for analyses	maf1, mac0_gnomAD	Consequence	syn	ultra rare	synonymous & maf1 & mac0_gnomAD
23261300	23261300_m4	23261300_m4	unqualified for analyses	maf5, mac0_gnomAD	Consequence	syn	ultra rare	synonymous & maf5 & mac0_gnomAD
23261300	23261300_m5	23261300_m5	unqualified for analyses	mac0_gnomAD	Polyphen2	pLoFdamMis	ultra rare	(missense | stop_gained) & weights_from_Polyphen2 & maf1 & mac0_gnomAD
23261300	23261300_m6	23261300_m6	unqualified for analyses	mac0_gnomAD	Polyphen2	pLoFdamMis	ultra rare	(missense | stop_gained) & weights_from_Polyphen2 & maf5 & mac0_gnomAD
23408866	23408866_m1	23408866_m1	qualified for analyses	noMAF	Consequence	misIndels	common	missense
23408866	23408866_m3	23408866_m3	qualified for analyses	noMAF	Polyphen2	damMis	common	Polyphen2_HDIV_pred_D | Polyphen2_HVAR_pred_D
23408866	23408866_m4	23408866_m4	qualified for analyses	noMAF	Consequence	coding	common	missense | synonymous | indels
23408866	23408866_m5	23408866_m5	qualified for analyses	maf5	Consequence	coding	common	(missense | synonymous | indels) & maf5
23408866	23408866_m6	23408866_m6	unqualified for analyses	noMAF	Consequence	syn	common	synonymous
23408866	23408866_m7	23408866_m7	unqualified for analyses	maf5	Consequence	syn	common	synonymous & maf5
23408866	23408866_m2	33974636_m1	qualified for analyses	maf5	Consequence	misIndels	common	missense & maf5
23555315	23555315_m2	23555315_m2	qualified for analyses	noMAF	Consequence	pLoFmis	common	missense | stop_gained | essential_splice | stop_lost
23555315	23555315_m3	23555315_m3	unqualified for analyses	maf1	Consequence	other	low-frequency	(coding | non_coding | intergenic) & maf1
23555315	23555315_m4	23555315_m4	unqualified for analyses	noMAF	Consequence	other	common	coding | non_coding | intergenic
23555315	23555315_m1	24507775_m3	qualified for analyses	maf1	Consequence	pLoFmis	low-frequency	(missense | stop_gained | stop_lost | essential_splice) & maf1
23633568	23633568_m1	23633568_m1	qualified for analyses	noMAF	Polyphen2, Consequence, SIFT	pLoFdamMis	common	stop_gained | frameshift | (missense & (SIFT_pred_D | Polyphen2_HVAR_pred_D_or_P | Polyphen2_HDIV_pred_D_or_P))
23633568	23633568_m2	23633568_m2	qualified for analyses	maf1	Polyphen2, Consequence, SIFT	pLoFdamMis	low-frequency	(stop_gained | frameshift | (missense & (SIFT_pred_D | Polyphen2_HVAR_pred_D_or_P | Polyphen2_HDIV_pred_D_or_P))) & maf1
23732877	23732877_m1	23732877_m1	unqualified for analyses	noMAF	Consequence	other	common	all_variants
23732877	23732877_m10	23732877_m10	unqualified for analyses	optMAF	Consequence	other	other	exonic & optMAF
23732877	23732877_m11	23732877_m11	unqualified for analyses	optMAF	Consequence	other	other	coding & optMAF
23732877	23732877_m13	23732877_m13	unqualified for analyses	optMAF	Consequence, Other annotation	other	other	PCon & optMAF
23732877	23732877_m14	23732877_m14	unqualified for analyses	optMAF	Consequence, Other annotation	other	other	RegPot & optMAF
23732877	23732877_m15	23732877_m15	unqualified for analyses	optMAF	Consequence, Other annotation	other	other	TFBS & optMAF
23732877	23732877_m16	23732877_m16	unqualified for analyses	optMAF	Consequence, Other annotation	other	other	CpG & optMAF
23732877	23732877_m2	23732877_m2	unqualified for analyses	noMAF	Consequence	other	common	exonic
23732877	23732877_m3	23732877_m3	unqualified for analyses	noMAF	Consequence	coding	common	coding
23732877	23732877_m5	23732877_m5	unqualified for analyses	noMAF	Consequence, Other annotation	other	common	PCon
23732877	23732877_m6	23732877_m6	unqualified for analyses	noMAF	Consequence, Other annotation	other	common	RegPot
23732877	23732877_m7	23732877_m7	unqualified for analyses	noMAF	Consequence, Other annotation	other	common	TFBS
23732877	23732877_m8	23732877_m8	unqualified for analyses	noMAF	Consequence, Other annotation	other	common	CpG
23732877	23732877_m9	23732877_m9	unqualified for analyses	optMAF	Consequence	other	other	all_variants & optMAF
23732877	23732877_m12	NA	unclear definition						Not clear if nonsense variants were included
23732877	23732877_m4	NA	unclear definition						Not clear if nonsense variants were included
24036952	24036952_m1	24036952_m1	qualified for analyses	maf1	Consequence	pLoFmis	low-frequency	(missense | essential_splice | start_lost | stop_gained | stop_lost) & maf1
24290377	24290377_m3	24290377_m3	qualified for analyses	noMAF	Consequence	pLoFmis	common	essential_splice | stop_gained | missense
24290377	24290377_m1	27346685_m1	qualified for analyses	maf1	Consequence	pLoFmis	low-frequency	(missense | stop_gained | essential_splice) & maf1
24290377	24290377_m2	28973304_m2	qualified for analyses	maf5	Consequence	pLoFmis	common	(missense | stop_gained | essential_splice) & maf5
24336208	24336208_m1	24336208_m1	qualified for analyses	maf0_5	Polyphen2, SIFT	damMis	low-frequency	(Polyphen2_HVAR_pred_D | Polyphen2_HDIV_pred_D | SIFT_pred_D) & maf0_5
24336208	24336208_m2	24336208_m2	qualified for analyses	maf0_5	Polyphen2, SIFT	misIndels	low-frequency	(Polyphen2_HVAR_pred_D | Polyphen2_HDIV_pred_D | SIFT_pred_D | Polyphen2_HVAR_pred_B | Polyphen2_HDIV_pred_B | SIFT_pred_B) & maf0_5
24336208	24336208_m3	24336208_m3	unqualified for analyses	maf0_5	SIFT, Polyphen2	pLoFdamMis	low-frequency	deleterious_excludingVal232Met & maf0_5
24463508	24463508_m1	24463508_m1	qualified for analyses	mac1	Consequence	pLoF	ultra rare	(stop_gained | essential_splice | frameshift) & mac1
24463508	24463508_m2	24463508_m2	qualified for analyses	mac1	MutationTaster, SIFT, Polyphen2, LRT, Consequence	pLoFdamMis	ultra rare	(stop_gained | essential_splice | frameshift | (missense & Polyphen2_HDIV_pred_D & Polyphen2_HVAR_pred_D & LRT_pred_D & MutationTaster_pred_D_or_A & SIFT_pred_D)) & mac1
24463508	24463508_m3	24463508_m3	qualified for analyses	mac1	MutationTaster, SIFT, Polyphen2, LRT, Consequence	pLoFdamMis	ultra rare	(stop_gained | essential_splice | frameshift | (missense & (Polyphen2_HDIV_pred_D | Polyphen2_HVAR_pred_D | LRT_pred_D | MutationTaster_pred_D_or_A | SIFT_pred_D))) & mac1
24463508	24463508_m4	24463508_m4	qualified for analyses	maf0_1	Consequence	pLoF	rare	(stop_gained | essential_splice | frameshift) & maf0_1
24463508	24463508_m5	24463508_m5	qualified for analyses	maf0_5	Consequence	pLoF	low-frequency	(stop_gained | essential_splice | frameshift) & maf0_5
24463508	24463508_m6	24463508_m6	qualified for analyses	maf0_1	MutationTaster, SIFT, Polyphen2, LRT, Consequence	pLoFdamMis	rare	(stop_gained | essential_splice | frameshift | (missense & Polyphen2_HDIV_pred_D & Polyphen2_HVAR_pred_D & LRT_pred_D & MutationTaster_pred_D_or_A & SIFT_pred_D)) & maf0_1
24463508	24463508_m7	24463508_m7	qualified for analyses	maf0_5	MutationTaster, SIFT, Polyphen2, LRT, Consequence	pLoFdamMis	low-frequency	(stop_gained | essential_splice | frameshift | (missense & Polyphen2_HDIV_pred_D & Polyphen2_HVAR_pred_D & LRT_pred_D & MutationTaster_pred_D_or_A & SIFT_pred_D)) & maf0_5
24463508	24463508_m8	24463508_m8	qualified for analyses	maf0_5	MutationTaster, SIFT, Polyphen2, LRT, Consequence	pLoFdamMis	low-frequency	(stop_gained | essential_splice | frameshift | (missense & (Polyphen2_HDIV_pred_D | Polyphen2_HVAR_pred_D | LRT_pred_D | MutationTaster_pred_D_or_A | SIFT_pred_D))) & maf0_5
24463508	24463508_m9	24463508_m9	qualified for analyses	maf0_1	MutationTaster, SIFT, Polyphen2, LRT, Consequence	pLoFdamMis	rare	(stop_gained | essential_splice | frameshift | (missense & (Polyphen2_HDIV_pred_D | Polyphen2_HVAR_pred_D | LRT_pred_D | MutationTaster_pred_D_or_A | SIFT_pred_D))) & maf0_1
24507775	24507775_m1	24507775_m1	qualified for analyses	maf5	Consequence	pLoF	common	(stop_gained | stop_lost | essential_splice) & maf5
24507775	24507775_m2	24507775_m2	qualified for analyses	maf5	Consequence	pLoFmis	common	(missense | stop_gained | stop_lost | essential_splice) & maf5
24507775	24507775_m3	24507775_m3	qualified for analyses	maf1	Consequence	pLoFmis	low-frequency	(missense | stop_gained | stop_lost | essential_splice) & maf1
24507775	24507775_m4	24507775_m4	qualified for analyses	maf0_5	Consequence	pLoFmis	low-frequency	(missense | stop_gained | stop_lost | essential_splice) & maf0_5
24507775	24507775_m5	24507775_m5	qualified for analyses	maf0_1	Consequence	pLoFmis	rare	(missense | stop_gained | stop_lost | essential_splice) & maf0_1
24507775	24507775_m6	24507775_m6	qualified for analyses	maf5	Polyphen2, Consequence	pLoFdamMis	common	(stop_gained | stop_lost | essential_splice | Polyphen2_HDIV_pred_D | Polyphen2_HVAR_pred_D) & maf5
24561134	24561134_m1	NA	unclear definition						Confusing definition when including missense, nonsynonymous, frameshift
24833718	24833718_m1	24833718_m1	qualified for analyses	mac0_gnomAD	Consequence	pLoFmis	ultra rare	(stop_gained | essential_splice | missense | indels | frameshift) & mac0_gnomAD
24987033	24987033_m1	24987033_m1	qualified for analyses	maf0_5	Consequence	pLoFmis	low-frequency	(missense | stop_gained | stop_lost | frameshift | essential_splice) & maf0_5
25187575	25187575_m1	25187575_m1	unqualified for analyses	maf1	Consequence	other	low-frequency	(stop_gained | stop_lost | essential_splice | missense | non_coding) & maf1
25187575	25187575_m2	25187575_m2	unqualified for analyses	maf5	Consequence	other	common	(stop_gained | stop_lost | essential_splice | missense | non_coding) & maf5
25374358	25374358_m1	25374358_m1	qualified for analyses	maf0_04	MutationTaster, SIFT, Polyphen2, phyloP, Consequence, GERP	pLoFdamMis	rare	(stop_gained | stop_lost | Polyphen2_HVAR_pred_D | Polyphen2_HDIV_pred_D) & (SIFT_pred_D & MutationTaster_pred_D_or_A & GERP_RS_positive & phyloP_positive) & maf0_04
25382069	25382069_m1	27589997_m1	qualified for analyses	maf1	Consequence	pLoFmis	low-frequency	(missense | stop_gained) & maf1
25487149	25487149_m2	22521419_m1	qualified for analyses	maf1	Consequence	misIndels	low-frequency	missense & maf1
25487149	25487149_m1	25487149_m1	qualified for analyses	maf1	Polyphen2, Consequence	damMis	low-frequency	(missense & Polyphen2_HDIV_pred_D_or_P) & maf1
25487149	25487149_m3	25487149_m3	qualified for analyses	maf1	Consequence	pLoF	low-frequency	(stop_gained | essential_splice | frameshift) & maf1
25650408	25650408_m1	25650408_m1	qualified for analyses	maf0_1	Consequence	coding	rare	(transcript_ablation | stop_gained | essential_splice | frameshift | stop_lost | start_lost | start_retained | indels | missense | transcript_amplification) & maf0_1
25691538	25691538_m1	NA	unclear definition						Mask not clearly defined
25691538	25691538_m2	NA	unclear definition						Mask not clearly defined
25730879	25730879_m1	25730879_m1	unqualified for analyses	maf5	Consequence	other	common	(coding | regulatory) & maf5
25739334	25739334_m3	25739334_m3	unqualified for analyses	maf1	Consequence	other	low-frequency	UTR & maf1
25739334	25739334_m4	25739334_m4	unqualified for analyses	maf5	Consequence	other	common	UTR & maf5
25739334	25739334_m1	NA	unclear definition						Mask not clearly defined
25739334	25739334_m2	NA	unclear definition						Mask not clearly defined
25788521	25788521_m1	NA	unclear definition						Mask not clearly defined
25796131	25796131_m1	25796131_m1	unqualified for analyses	noMAF	Consequence, Other annotation	other	common	nonsynonymous_func_domain
26101835	26101835_m1	NA	unclear definition						Novel and rare variants not clearly defined
26101835	26101835_m2	NA	unclear definition						Novel and rare variants not clearly defined
26101835	26101835_m3	NA	unclear definition						Novel and rare variants not clearly defined
26489027	26489027_m3	22521419_m1	qualified for analyses	maf1	Consequence	misIndels	low-frequency	missense & maf1
26489027	26489027_m1	26489027_m1	qualified for analyses	maf1	Consequence	pLoFmis	low-frequency	(stop_gained | essential_splice | frameshift | stop_lost | start_lost | missense | indels) & maf1
26489027	26489027_m2	26489027_m2	qualified for analyses	maf1	Consequence	pLoFmis	low-frequency	(stop_gained | stop_lost | essential_splice | start_lost | frameshift | indels) & maf1
26501415	26501415_m3	24507775_m3	qualified for analyses	maf1	Consequence	pLoFmis	low-frequency	(missense | stop_gained | stop_lost | essential_splice) & maf1
26501415	26501415_m1	24507775_m4	qualified for analyses	maf0_5	Consequence	pLoFmis	low-frequency	(missense | stop_gained | stop_lost | essential_splice) & maf0_5
26501415	26501415_m2	26501415_m2	qualified for analyses	mac1	Consequence	pLoFmis	ultra rare	(missense | stop_gained | splice_site | stop_lost) & mac1
26501415	26501415_m4	26501415_m4	unqualified for analyses	maf0_5	Consequence, Other annotation	other	low-frequency	func_domain_CCP1_4 & maf0_5
26501415	26501415_m5	26501415_m5	unqualified for analyses	maf0_5	Consequence, Other annotation	other	low-frequency	func_domain_CCP6_8 & maf0_5
26501415	26501415_m6	26501415_m6	unqualified for analyses	maf0_5	Consequence, Other annotation	other	low-frequency	func_domain_CCP19_20 & maf0_5
26501415	26501415_m7	26501415_m7	unqualified for analyses	maf0_5	Consequence, Other annotation	other	low-frequency	func_domain & maf0_5
26501415	26501415_m8	26501415_m8	unqualified for analyses	maf0_5	Consequence, Other annotation	other	low-frequency	Functional domains and LOF, <0.5%
26566670	26566670_m1	26566670_m1	qualified for analyses	mac0_gnomAD	Consequence	pLoFmis	ultra rare	(missense | stop_gained | essential_splice) & mac0_gnomAD
26658788	26658788_m1	26658788_m1	qualified for analyses	maf1	Consequence	pLoFmis	low-frequency	(essential_splice | stop_gained | stop_lost | missense | indels) & maf1
26689913	26689913_m1	26689913_m1	qualified for analyses	maf0_05	Consequence	pLoF	rare	(stop_gained | essential_splice | frameshift) & maf0_05
26951679	26951679_m1	26951679_m1	unqualified for analyses	maf1	KGGSeq	pLoFdamMis	low-frequency	(stop_gained | frameshift | indels | missense & KGGSeq) & maf1
27111861	27111861_m1	NA	unclear definition						LR score not applicable
27120077	27120077_m4	24463508_m1	qualified for analyses	mac1	Consequence	pLoF	ultra rare	(stop_gained | essential_splice | frameshift) & mac1
27120077	27120077_m5	24463508_m2	qualified for analyses	mac1	MutationTaster, SIFT, Polyphen2, LRT, Consequence	pLoFdamMis	ultra rare	(stop_gained | essential_splice | frameshift | (missense & Polyphen2_HDIV_pred_D & Polyphen2_HVAR_pred_D & LRT_pred_D & MutationTaster_pred_D_or_A & SIFT_pred_D)) & mac1
27120077	27120077_m6	24463508_m3	qualified for analyses	mac1	MutationTaster, SIFT, Polyphen2, LRT, Consequence	pLoFdamMis	ultra rare	(stop_gained | essential_splice | frameshift | (missense & (Polyphen2_HDIV_pred_D | Polyphen2_HVAR_pred_D | LRT_pred_D | MutationTaster_pred_D_or_A | SIFT_pred_D))) & mac1
27120077	27120077_m7	24463508_m4	qualified for analyses	maf0_1	Consequence	pLoF	rare	(stop_gained | essential_splice | frameshift) & maf0_1
27120077	27120077_m8	24463508_m6	qualified for analyses	maf0_1	MutationTaster, SIFT, Polyphen2, LRT, Consequence	pLoFdamMis	rare	(stop_gained | essential_splice | frameshift | (missense & Polyphen2_HDIV_pred_D & Polyphen2_HVAR_pred_D & LRT_pred_D & MutationTaster_pred_D_or_A & SIFT_pred_D)) & maf0_1
27120077	27120077_m9	24463508_m9	qualified for analyses	maf0_1	MutationTaster, SIFT, Polyphen2, LRT, Consequence	pLoFdamMis	rare	(stop_gained | essential_splice | frameshift | (missense & (Polyphen2_HDIV_pred_D | Polyphen2_HVAR_pred_D | LRT_pred_D | MutationTaster_pred_D_or_A | SIFT_pred_D))) & maf0_1
27120077	27120077_m1	25487149_m3	qualified for analyses	maf1	Consequence	pLoF	low-frequency	(stop_gained | essential_splice | frameshift) & maf1
27120077	27120077_m2	27120077_m2	qualified for analyses	maf1	MutationTaster, SIFT, Polyphen2, LRT, Consequence	pLoFdamMis	low-frequency	(stop_gained | essential_splice | frameshift | (missense & Polyphen2_HDIV_pred_D & Polyphen2_HVAR_pred_D & LRT_pred_D & MutationTaster_pred_D_or_A & SIFT_pred_D)) & maf1
27120077	27120077_m3	27120077_m3	qualified for analyses	maf1	MutationTaster, SIFT, Polyphen2, LRT, Consequence	pLoFdamMis	low-frequency	(stop_gained | essential_splice | frameshift | (missense & (Polyphen2_HDIV_pred_D | Polyphen2_HVAR_pred_D | LRT_pred_D | MutationTaster_pred_D_or_A | SIFT_pred_D))) & maf1
27249223	27249223_m1	27249223_m1	unqualified for analyses	maf5	Consequence	other	common	(coding | non_coding) & maf5
27346685	27346685_m1	27346685_m1	qualified for analyses	maf1	Consequence	pLoFmis	low-frequency	(missense | stop_gained | essential_splice) & maf1
27486782	27486782_m1	NA	unclear definition						Mask not clearly defined
27589997	27589997_m1	27589997_m1	qualified for analyses	maf1	Consequence	pLoFmis	low-frequency	(missense | stop_gained) & maf1
27658901	27658901_m1	27658901_m1	unqualified for analyses	maf1	Consequence	pLoFmis	low-frequency	(missense | stop_gained | stop_lost | essential_splice | indels | start_lost | start_gained) & maf1
27732968	27732968_m1	27732968_m1	qualified for analyses	maf3	Polyphen2, Consequence, SIFT, CADD	pLoFdamMis	common	(frameshift | missense | stop_gained | stop_lost) & (Polyphen2_HDIV_pred_D | Polyphen2_HVAR_pred_D | SIFT_pred_D | CADD_phred_10) & maf3
27956748	27956748_m1	24507775_m3	qualified for analyses	maf1	Consequence	pLoFmis	low-frequency	(missense | stop_gained | stop_lost | essential_splice) & maf1
28067910	28067910_m1	28067910_m1	qualified for analyses	maf0_5	Consequence	coding	low-frequency	(frameshift | stop_gained | start_lost | start_retained | essential_splice | missense | stop_lost | indels) & maf0_5
28067910	28067910_m2	28067910_m2	qualified for analyses	maf0_5	CADD, Consequence	coding	low-frequency	(frameshift | (stop_gained | start_lost | start_retained | essential_splice | missense | stop_lost) & CADD_phred_21) & maf0_5
28117402	28117402_m1	27589997_m1	qualified for analyses	maf1	Consequence	pLoFmis	low-frequency	(missense | stop_gained) & maf1
28425186	28425186_m1	NA	unclear definition						Mask not clearly defined
28425186	28425186_m2	NA	unclear definition						Mask not clearly defined
28430856	28430856_m1	28430856_m1	unqualified for analyses	maf1, mac0_gnomAD	Consequence	other	ultra rare	(intronic | exonic | synonymous | coding) & (maf1 | mac0_gnomAD)
28472652	28472652_m1	28472652_m1	unqualified for analyses	noMAF	Consequence, Polyphen2	pLoFdamMis	common	denovo_damaging
28630456	28630456_m1	28630456_m1	qualified for analyses	maf1	Consequence	pLoF	low-frequency	(stop_gained | essential_splice) & maf1
28630456	28630456_m2	28630456_m2	qualified for analyses	mac1	Consequence	pLoF	ultra rare	(stop_gained | essential_splice) & mac1
28630456	28630456_m3	28630456_m3	qualified for analyses	maf1	MutationTaster, SIFT, Polyphen2, LRT, Consequence	pLoFdamMis	low-frequency	(stop_gained | essential_splice | (missense & Polyphen2_HDIV_pred_D & Polyphen2_HVAR_pred_D & LRT_pred_D & MutationTaster_pred_D_or_A & SIFT_pred_D)) & maf1
28630456	28630456_m4	28630456_m4	qualified for analyses	mac1	MutationTaster, SIFT, Polyphen2, LRT, Consequence	pLoFdamMis	ultra rare	(stop_gained | essential_splice | (missense & Polyphen2_HDIV_pred_D & Polyphen2_HVAR_pred_D & LRT_pred_D & MutationTaster_pred_D_or_A & SIFT_pred_D)) & mac1
28630456	28630456_m5	28630456_m5	qualified for analyses	maf1	MutationTaster, SIFT, Polyphen2, LRT, Consequence	pLoFdamMis	low-frequency	(stop_gained | essential_splice | (missense & (Polyphen2_HDIV_pred_D | Polyphen2_HVAR_pred_D | LRT_pred_D | MutationTaster_pred_D_or_A | SIFT_pred_D))) & maf1
28630456	28630456_m6	28630456_m6	qualified for analyses	mac1	MutationTaster, SIFT, Polyphen2, LRT, Consequence	pLoFdamMis	ultra rare	(stop_gained | essential_splice | (missense & (Polyphen2_HDIV_pred_D | Polyphen2_HVAR_pred_D | LRT_pred_D | MutationTaster_pred_D_or_A | SIFT_pred_D))) & mac1
28659821	28659821_m1	28659821_m1	qualified for analyses	mac0_gnomAD	Consequence	pLoFmis	ultra rare	(missense | stop_gained | essential_splice | indels | frameshift | stop_lost) & mac0_gnomAD
28659821	28659821_m2	28659821_m2	qualified for analyses	maf0_01	Consequence	pLoFmis	ultra rare	(missense | stop_gained | essential_splice | indels | frameshift | stop_lost) & maf0_01
28659821	28659821_m3	28659821_m3	qualified for analyses	maf0_1, maf_gt_0_01	CADD, Consequence	pLoFmis	rare	(missense | stop_gained | essential_splice | indels | frameshift | stop_lost) & CADD_phred_20 & maf_gt_0_01 & maf0_1
28678401	28678401_m1	NA	unclear definition						Mask not clearly defined
28709720	28709720_m1	31700678_m1	qualified for analyses	maf0_1	Consequence	misIndels	rare	missense & maf0_1
28854705	28854705_m1	28854705_m1	qualified for analyses	maf5	Consequence	pLoFmis	common	(stop_gained | stop_lost | frameshift | essential_splice | missense) & maf5
28973304	28973304_m1	27346685_m1	qualified for analyses	maf1	Consequence	pLoFmis	low-frequency	(missense | stop_gained | essential_splice) & maf1
28973304	28973304_m2	28973304_m2	qualified for analyses	maf5	Consequence	pLoFmis	common	(missense | stop_gained | essential_splice) & maf5
28985224	28985224_m1	32640185_m8	qualified for analyses	maf1	Consequence	pLoFmis	low-frequency	(stop_gained | stop_lost | essential_splice | frameshift | start_lost | missense) & maf1
29036293	29036293_m1	30269813_m6	qualified for analyses	maf0_1	Consequence	pLoFmis	rare	(stop_gained | essential_splice | frameshift | missense | indels) & maf0_1
29036630	29036630_m1	NA	unclear definition						Mask not clearly defined
29074453	29074453_m2	29074453_m2	qualified for analyses	maf1	Consequence, MCAP	pLoFmis	low-frequency	(frameshift | stop_gained | stop_lost | essential_splice | M_CAP_score_0_025 | missense | indels) & maf1
29074453	29074453_m1	29140481_m1	qualified for analyses	maf1	Consequence	pLoF	low-frequency	(stop_gained | stop_lost | essential_splice | frameshift) & maf1
29140481	29140481_m1	29140481_m1	qualified for analyses	maf1	Consequence	pLoF	low-frequency	(stop_gained | stop_lost | essential_splice | frameshift) & maf1
29140481	29140481_m2	29140481_m2	qualified for analyses	maf3	Consequence	pLoF	common	(stop_gained | stop_lost | essential_splice | frameshift) & maf3
29140481	29140481_m3	29140481_m3	qualified for analyses	maf1	CADD, Consequence	pLoFdamMis	low-frequency	(stop_gained | stop_lost | essential_splice | frameshift | CADD_phred_12_37) & maf1
29140481	29140481_m4	29140481_m4	qualified for analyses	maf3	CADD, Consequence	pLoFdamMis	common	(stop_gained | stop_lost | essential_splice | frameshift | CADD_phred_12_37) & maf3
29140481	29140481_m5	29140481_m5	qualified for analyses	maf1	CADD, Consequence	pLoFmis	low-frequency	(stop_gained | stop_lost | essential_splice | frameshift | CADD_phred_12_37 | missense) & maf1
29140481	29140481_m6	29140481_m6	qualified for analyses	maf3	CADD, Consequence	pLoFmis	common	(stop_gained | stop_lost | essential_splice | frameshift | CADD_phred_12_37 | missense) & maf3
29177435	29177435_m1	29177435_m1	qualified for analyses	maf1	IMPACT, Consequence	coding	low-frequency	(incomplete_terminal_codon | start_retained | stop_retained | synonymous | IMPACT_MODERATE | IMPACT_HIGH) & maf1
29181857	29181857_m1	NA	unclear definition						Unclear MAF (singleton or MAF 0.2%)
29304371	29304371_m1	22521419_m1	qualified for analyses	maf1	Consequence	misIndels	low-frequency	missense & maf1
29378355	29378355_m1	29378355_m1	qualified for analyses	maf5, maf_gt_0_5	Consequence	pLoFmis	common	(stop_gained | missense | essential_splice) & maf5 & maf_gt_0_5
29378355	29378355_m2	29378355_m2	qualified for analyses	maf0_5	Consequence	pLoFmis	low-frequency	(stop_gained | missense | essential_splice) & maf0_5
29522175	29522175_m1	25487149_m3	qualified for analyses	maf1	Consequence	pLoF	low-frequency	(stop_gained | essential_splice | frameshift) & maf1
29522175	29522175_m3	29522175_m3	qualified for analyses	maf0_01	IMPACT, Consequence	coding	ultra rare	(incomplete_terminal_codon | start_retained | stop_retained | synonymous | IMPACT_MODERATE | IMPACT_HIGH) & maf0_01
29522175	29522175_m2	33239198_m1	qualified for analyses	maf1	Consequence	pLoFmis	low-frequency	(stop_gained | essential_splice | frameshift | missense) & maf1
29544907	29544907_m1	29544907_m1	unqualified for analyses	noMAF	Consequence	other	common
29566793	29566793_m1	29566793_m1	qualified for analyses	maf0_1	Consequence	pLoF	rare	(stop_gained | essential_splice) & maf0_1
29593342	29593342_m1	29593342_m1	qualified for analyses	maf5	CADD	pLoFdamMis	common	CADD_phred_10 & maf5
29669943	29669943_m1	29669943_m1	qualified for analyses	maf1	MutationTaster, SIFT, Polyphen2, LRT, FATHMM	damMis	low-frequency	(((Polyphen2_HDIV_pred_D_or_P | Polyphen2_HVAR_pred_D_or_P) & LRT_pred_D & MutationTaster_pred_D_or_A & SIFT_pred_D) | ((Polyphen2_HDIV_pred_D_or_P | Polyphen2_HVAR_pred_D_or_P) & LRT_pred_D & MutationTaster_pred_D_or_A & FATHMM_pred_D) | ((Polyphen2_HDIV_pred_D_or_P | Polyphen2_HVAR_pred_D_or_P) & LRT_pred_D & SIFT_pred_D & FATHMM_pred_D) | ((Polyphen2_HDIV_pred_D_or_P | Polyphen2_HVAR_pred_D_or…
29706360	29706360_m1	28973304_m2	qualified for analyses	maf5	Consequence	pLoFmis	common	(missense | stop_gained | essential_splice) & maf5
29861106	29861106_m1	29861106_m1	qualified for analyses	maf0_1	Consequence	pLoF	rare	(frameshift | transcript_ablation | essential_splice | stop_gained) & maf0_1
29861106	29861106_m2	29861106_m2	qualified for analyses	maf0_1	MutationTaster, SIFT, MutationAssessor, Polyphen2, PROVEAN, LRT, Consequence	pLoFdamMis	rare	(frameshift | transcript_ablation | essential_splice | stop_gained | ((missense | indels) & (Polyphen2_HDIV_pred_D & Polyphen2_HVAR_pred_D & LRT_pred_D & MutationTaster_pred_D_or_A & SIFT_pred_D & MutationAssessor_pred_H_or_M & PROVEAN_pred_D))) & maf0_1
29915322	29915322_m1	25487149_m3	qualified for analyses	maf1	Consequence	pLoF	low-frequency	(stop_gained | essential_splice | frameshift) & maf1
29915322	29915322_m2	29915322_m2	qualified for analyses	maf1	CADD, Consequence	pLoFdamMis	low-frequency	(stop_gained | essential_splice | frameshift | ((missense | indels) & CADD_phred_20)) & maf1
29955173	29955173_m6	22521419_m1	qualified for analyses	maf1	Consequence	misIndels	low-frequency	missense & maf1
29955173	29955173_m2	28854705_m1	qualified for analyses	maf5	Consequence	pLoFmis	common	(stop_gained | stop_lost | frameshift | essential_splice | missense) & maf5
29955173	29955173_m4	29140481_m1	qualified for analyses	maf1	Consequence	pLoF	low-frequency	(stop_gained | stop_lost | essential_splice | frameshift) & maf1
29955173	29955173_m1	29955173_m1	qualified for analyses	maf5	Consequence	pLoF	common	(stop_gained | stop_lost | essential_splice | frameshift) & maf5
29955173	29955173_m5	29955173_m5	qualified for analyses	maf1	Consequence	pLoFmis	low-frequency	(stop_gained | stop_lost | essential_splice | frameshift | missense) & maf1
29955173	29955173_m3	33974636_m1	qualified for analyses	maf5	Consequence	misIndels	common	missense & maf5
29981437	29981437_m1	NA	unclear definition						Unclear combinations of bioinformatic algorithms
29981437	29981437_m2	NA	unclear definition						Unclear combinations of bioinformatic algorithms
29981437	29981437_m3	NA	unclear definition						Unclear combinations of bioinformatic algorithms
30009200	30009200_m1	30009200_m1	unqualified for analyses	maf0_01	Consequence	pLoF	ultra rare	(stop_gained | frameshift | essential_splice | start_lost | exon_loss_variant) & maf0_01
30009200	30009200_m2	30009200_m2	unqualified for analyses	maf0_01	Consequence	syn	ultra rare	synonymous & maf0_01
30029678	30029678_m1	30029678_m1	unqualified for analyses	maf0_01	REVEL	pLoFdamMis	ultra rare	(stop_gained | frameshift | essential_splice | exon_loss_variant | missense & REVEL_score_0_5) & maf0_01
30060175	30060175_m1	30060175_m1	qualified for analyses	maf1	FATHMM	pLoFdamMis	low-frequency	FATHMM_pred_D & maf1
30060175	30060175_m2	30060175_m2	qualified for analyses	maf1	IMPACT	misIndels	low-frequency	IMPACT_MODERATE & maf1
30108311	30108311_m1	30108311_m1	qualified for analyses	maf5	IMPACT, CADD	pLoF	common	IMPACT_HIGH & CADD_phred_20 & maf5
30108311	30108311_m3	30108311_m3	qualified for analyses	maf5	IMPACT, CADD	pLoFdamMis	common	(IMPACT_HIGH | IMPACT_MODERATE) & CADD_phred_15 & maf5
30108311	30108311_m4	30108311_m4	qualified for analyses	maf5	IMPACT	pLoF	common	IMPACT_HIGH & maf5
30108311	30108311_m5	30108311_m5	qualified for analyses	maf5	IMPACT	pLoFmis	common	(IMPACT_HIGH | IMPACT_MODERATE) & maf5
30108311	30108311_m2	30405126_m1	qualified for analyses	maf5	LOFTEE	pLoF	common	LoF_HC & maf5
30256453	30256453_m1	22521419_m1	qualified for analyses	maf1	Consequence	misIndels	low-frequency	missense & maf1
30256453	30256453_m2	30256453_m2	qualified for analyses	maf1	MutationTaster, SIFT, Polyphen2, LRT, Consequence	damMis	low-frequency	(missense & Polyphen2_HDIV_pred_D & Polyphen2_HVAR_pred_D & LRT_pred_D & MutationTaster_pred_D_or_A & SIFT_pred_D) & maf1
30269813	30269813_m1	24463508_m4	qualified for analyses	maf0_1	Consequence	pLoF	rare	(stop_gained | essential_splice | frameshift) & maf0_1
30269813	30269813_m2	30269813_m2	qualified for analyses	maf0_1	Polyphen2, Consequence	pLoFdamMis	rare	(stop_gained | essential_splice | frameshift | (missense & (Polyphen2_HDIV_pred_D | Polyphen2_HVAR_pred_D))) & maf0_1
30269813	30269813_m3	30269813_m3	qualified for analyses	maf0_1	Consequence	pLoFmis	rare	(stop_gained | essential_splice | frameshift | indels) & maf0_1
30269813	30269813_m4	30269813_m4	qualified for analyses	maf0_1	Polyphen2, Consequence	pLoFdamMis	rare	(stop_gained | essential_splice | frameshift | indels | (missense & (Polyphen2_HDIV_pred_D | Polyphen2_HVAR_pred_D))) & maf0_1
30269813	30269813_m5	30269813_m5	qualified for analyses	maf0_1	Consequence	pLoFmis	rare	(stop_gained | essential_splice | frameshift | missense) & maf0_1
30269813	30269813_m6	30269813_m6	qualified for analyses	maf0_1	Consequence	pLoFmis	rare	(stop_gained | essential_splice | frameshift | missense | indels) & maf0_1
30314816	30314816_m1	30314816_m1	unqualified for analyses	maf1	Consequence	other	low-frequency	(coding | non_coding) & maf1
30314816	30314816_m2	NA	unclear definition						ClinVar and specific search through PubMed
30377230	30377230_m1	27346685_m1	qualified for analyses	maf1	Consequence	pLoFmis	low-frequency	(missense | stop_gained | essential_splice) & maf1
30377230	30377230_m2	30377230_m2	qualified for analyses	maf0_1	Consequence	pLoFmis	rare	(stop_gained | essential_splice | missense) & maf0_1
30377230	30377230_m3	30377230_m3	qualified for analyses	maf0_01	Consequence	pLoFmis	ultra rare	(stop_gained | essential_splice | missense) & maf0_01
30382371	30382371_m1	29378355_m2	qualified for analyses	maf0_5	Consequence	pLoFmis	low-frequency	(stop_gained | missense | essential_splice) & maf0_5
30382371	30382371_m2	30382371_m2	qualified for analyses	maf0_5	Consequence	pLoFmis	low-frequency	(missense | stop_gained | essential_splice | indels) & maf0_5
30405126	30405126_m1	30405126_m1	qualified for analyses	maf5	LOFTEE	pLoF	common	LoF_HC & maf5
30405126	30405126_m10	30405126_m10	unqualified for analyses	maf5	Eigen	other	common	regulatory & EigenPhred_weighted & maf5
30405126	30405126_m2	30405126_m2	qualified for analyses	maf5	LOFTEE	pLoF	common	(LoF_HC | LoF_LC) & maf5
30405126	30405126_m3	30405126_m3	qualified for analyses	maf5	CADD	pLoFdamMis	common	CADD_phred_5_85 & maf5
30405126	30405126_m5	30405126_m5	unqualified for analyses	maf5	CADD	pLoFdamMis	common	CADD_weighted & maf5
30405126	30405126_m6	30405126_m6	unqualified for analyses	maf5	CADD	pLoFdamMis	common	CADD_weighted_extended50kb & maf5
30405126	30405126_m7	30405126_m7	unqualified for analyses	maf5	Eigen	other	common	(regulatory | exonic) & EigenPhred_weighted & maf5
30405126	30405126_m8	30405126_m8	unqualified for analyses	maf5	Eigen	other	common	(regulatory | exonic) & EigenPC_weighted & maf5
30405126	30405126_m9	30405126_m9	unqualified for analyses	maf5	Eigen	other	common	(regulatory | exonic) & Eigen_weighted & maf5
30405126	30405126_m4	NA	unclear definition						Unclear definition of more severe than missense according to Ensembl
30415495	30415495_m1	30415495_m1	qualified for analyses	maf1	Polyphen2, Consequence	pLoFdamMis	low-frequency	(stop_gained | essential_splice | frameshift | (missense & (Polyphen2_HDIV_pred_D | Polyphen2_HVAR_pred_D))) & maf1
30425093	30425093_m1	30425093_m1	qualified for analyses	maf1	ClinVar	pLoFdamMis	low-frequency	ClinVar_pred_P_or_LP & maf1
30425093	30425093_m2	30425093_m2	qualified for analyses	maf1	Consequence	pLoF	low-frequency	(stop_gained | frameshift) & maf1
30448225	30448225_m1	30448225_m1	qualified for analyses	maf0_5	IMPACT, Polyphen2, MutationTaster, SIFT	pLoFdamMis	low-frequency	(IMPACT_HIGH | IMPACT_MODERATE) & (Polyphen2_HDIV_pred_D | Polyphen2_HVAR_pred_D | MutationTaster_pred_D_or_A | SIFT_pred_D) & maf0_5
30532020	30532020_m1	30532020_m1	unqualified for analyses	maf0_01	Consequence	other	ultra rare	(coding | non_coding) & maf0_01
30547231	30547231_m1	30547231_m1	unqualified for analyses	noMAF	Consequence	other	common	(missense | synonymous | essential_splice | stop_gained | stop_lost | UTR | intronic)
30622330	30622330_m1	30622330_m1	qualified for analyses	maf0_05	MutationTaster, SIFT, MutationAssessor, Polyphen2, LRT, Consequence, FATHMM	pLoFdamMis	rare	((stop_gained | essential_splice | frameshift) | ((missense & (SIFT_pred_D & Polyphen2_HDIV_pred_D & LRT_pred_D) | (SIFT_pred_D & Polyphen2_HDIV_pred_D & MutationTaster_pred_D_or_A) | (SIFT_pred_D & Polyphen2_HDIV_pred_D & MutationAssessor_pred_H_or_M) | (SIFT_pred_D & Polyphen2_HDIV_pred_D & FATHMM_pred_D) | (SIFT_pred_D & LRT_pred_D & MutationTaster_pred_D_or_A) | (SIFT_pred_D & LRT_pred_D & Mu…
30671673	30671673_m1	30671673_m1	unqualified for analyses	maf1	CADD	pLoFdamMis	low-frequency	(indels | frameshift | essential_splice | start_lost | stop_gained | stop_lost | missense | exon_loss_variant | start_gained) & CADD_phred_10 & maf1
30671673	30671673_m2	30671673_m2	unqualified for analyses	noMAF	CADD	other	low-frequency	(non_coding | synonymous) & CADD_phred_10 & maf1
30671673	30671673_m3	30671673_m3	unqualified for analyses	maf1	CADD	other	low-frequency	(indels | frameshift | essential_splice | start_lost | stop_gained | stop_lost | missense | exon_loss_variant | start_gained | non_coding | synonymous) & CADD_phred_10 & maf1
30675382	30675382_m1	30675382_m1	qualified for analyses	maf5, maf_gt_0_0001	Consequence	pLoFmis	common	(missense | splice_site | start_lost | stop_lost | stop_gained) & maf5 & maf_gt_0_0001
30679032	30679032_m1	24507775_m3	qualified for analyses	maf1	Consequence	pLoFmis	low-frequency	(missense | stop_gained | stop_lost | essential_splice) & maf1
30766545	30766545_m1	NA	unclear definition						Not sure if one or all prediction conditions need to be met
30766545	30766545_m2	NA	unclear definition						Not sure if one or all prediction conditions need to be met
30766545	30766545_m3	NA	unclear definition						Not sure if one or all prediction conditions need to be met
30777372	30777372_m1	30777372_m1	qualified for analyses	maf0_5	CADD, LOFTEE	pLoFdamMis	low-frequency	(LoF_HC | CADD_phred_20) & maf0_5
30828346	30828346_m1	30828346_m1	qualified for analyses	maf10	Consequence	coding	common	(missense | synonymous | stop_gained | stop_lost) & maf10
30828346	30828346_m2	30828346_m2	unqualified for analyses	maf10	Consequence, Other annotation	misIndels	common	missense_in_CSVS & maf10
31036833	31036833_m1	31036833_m1	unqualified for analyses	maf5	Consequence	pLoFmis	common	(missense | stop_gained | stop_lost | start_lost | indels | frameshift | essential_splice | start_gained | codon_gained | codon_lost) & maf5
31036833	31036833_m2	31036833_m2	unqualified for analyses	maf5	Consequence	pLoFmis	common	(missense | stop_gained | stop_lost | start_lost | indels | frameshift | essential_splice | start_gained | codon_gained | codon_lost | splice_site) & maf5
31118516	31118516_m1	31118516_m1	qualified for analyses	noMAF	Eigen, MutationTaster, SIFT, MCAP, Polyphen2, LOFTEE, PROVEAN, LRT, CADD, MetaSVM, VEST, MetaLR, FATHMM, DANN	pLoFdamMis	common	LoF_HC | (VEST_rankscore_0_9 & CADD_raw_rankscore_0_9 & DANN_rankscore_0_9 & Eigen_PC_raw_rankscore_0_9 & FATHMM_pred_D & FATHMM_MKL_pred_D & PROVEAN_pred_D & MetaSVM_pred_D & MetaLR_pred_D & M_CAP_score_0_025 & Polyphen2_HDIV_pred_D & Polyphen2_HVAR_pred_D & SIFT_pred_D & LRT_pred_D & MutationTaster_pred_D_or_A)
31118516	31118516_m2	31118516_m2	qualified for analyses	noMAF	MutationTaster, SIFT, MCAP, Polyphen2, LOFTEE, PROVEAN, LRT, MetaSVM, MetaLR, FATHMM	pLoFdamMis	common	LoF_HC | (FATHMM_pred_D & FATHMM_MKL_pred_D & PROVEAN_pred_D & MetaSVM_pred_D & MetaLR_pred_D & M_CAP_score_0_025 & Polyphen2_HDIV_pred_D & Polyphen2_HVAR_pred_D & SIFT_pred_D & LRT_pred_D & MutationTaster_pred_D_or_A)
31118516	31118516_m3	31118516_m3	qualified for analyses	noMAF	LOFTEE	pLoF	common	LoF_HC
31118516	31118516_m4	31118516_m4	qualified for analyses	maf1	IMPACT, MutationTaster, SIFT, Polyphen2, LOFTEE, LRT	pLoFdamMis	common	LoF_HC | (Polyphen2_HDIV_pred_D & Polyphen2_HVAR_pred_D & SIFT_pred_D & LRT_pred_D & MutationTaster_pred_D_or_A) | (IMPACT_HIGH & LoF_LC & maf1)
31118516	31118516_m5	31118516_m5	qualified for analyses	noMAF	MutationTaster, SIFT, Polyphen2, LOFTEE, LRT	pLoFdamMis	common	LoF_HC | (Polyphen2_HDIV_pred_D & Polyphen2_HVAR_pred_D & SIFT_pred_D & LRT_pred_D & MutationTaster_pred_D_or_A)
31118516	31118516_m6	31118516_m6	qualified for analyses	maf1	IMPACT, MutationTaster, SIFT, Polyphen2, LOFTEE, LRT	pLoFdamMis	common	LoF_HC | (Polyphen2_HDIV_pred_D & Polyphen2_HVAR_pred_D & SIFT_pred_D & LRT_pred_D & MutationTaster_pred_D_or_A) | (IMPACT_MODERATE & (Polyphen2_HDIV_pred_D | Polyphen2_HVAR_pred_D | SIFT_pred_D | LRT_pred_D | MutationTaster_pred_D_or_A) & maf1) | (IMPACT_HIGH & LoF_LC & maf1)
31118516	31118516_m7	31118516_m7	qualified for analyses	maf1	IMPACT, MutationTaster, SIFT, Polyphen2, LOFTEE, LRT	pLoFdamMis	common	LoF_HC | (Polyphen2_HDIV_pred_D & Polyphen2_HVAR_pred_D & SIFT_pred_D & LRT_pred_D & MutationTaster_pred_D_or_A) | (IMPACT_MODERATE & maf1) | (IMPACT_HIGH & LoF_LC & maf1)
31135820	31135820_m1	31135820_m1	qualified for analyses	maf1	CADD, Consequence	pLoFdamMis	low-frequency	(missense | stop_gained) & CADD_phred_20 & maf1
31217188	31217188_m1	NA	unclear definition						Mask not clearly defined, exclusion criteria included
31308072	31308072_m1	31308072_m1	unqualified for analyses	maf0_01	CADD, Polyphen2, SIFT, MCAP, LRT, MutationTaster	pLoFdamMis	ultra rare	(LoF_HC | missense & 3of5) & CADD_phred_10 & maf0_01 & mac0_ctr
31308240	31308240_m1	31308240_m1	qualified for analyses	maf5	Consequence	pLoFmis	common	(missense | stop_gained | stop_lost | frameshift) & maf5
31308240	31308240_m2	31308240_m2	qualified for analyses	noMAF	Consequence	pLoFmis	common	missense | stop_gained | stop_lost | frameshift
31327507	31327507_m1	31327507_m1	qualified for analyses	mac1, mac0_gnomAD	Consequence, MPC	pLoFdamMis	ultra rare	(transcript_ablation | stop_gained | essential_splice | frameshift | indels | (missense & MPC_gt2)) & mac1 & mac0_gnomAD
31327507	31327507_m2	31327507_m2	qualified for analyses	mac3, mac0_gnomAD	Consequence, MPC	pLoFdamMis	ultra rare	(transcript_ablation | stop_gained | essential_splice | frameshift | indels | (missense & MPC_gt2)) & mac3 & mac0_gnomAD
31327507	31327507_m3	31327507_m3	qualified for analyses	maf1	Consequence	misIndels	low-frequency	indels & maf1
31327507	31327507_m4	31327507_m4	qualified for analyses	maf1	Consequence	pLoF	low-frequency	(transcript_ablation | stop_gained | essential_splice | frameshift) & maf1
31327507	31327507_m5	31327507_m5	qualified for analyses	maf1	Consequence, MPC	damMis	low-frequency	missense & MPC_gt2 & maf1
31327507	31327507_m6	31327507_m6	qualified for analyses	maf1	Consequence, MPC	pLoFdamMis	low-frequency	(transcript_ablation | stop_gained | essential_splice | frameshift | (missense & MPC_gt2)) & maf1
31338326	31338326_m1	31338326_m1	qualified for analyses	maf5	IMPACT, Consequence	coding	common	(incomplete_terminal_codon | start_retained | stop_retained | synonymous | IMPACT_MODERATE | IMPACT_HIGH) & maf5
31383942	31383942_m1	31383942_m1	qualified for analyses	maf0_1	Consequence	pLoF	rare	(stop_gained | stop_lost | frameshift | essential_splice) & maf0_1
31383942	31383942_m10	31383942_m10	qualified for analyses	maf0_1	ClinVar, Consequence	pLoFdamMis	rare	(stop_gained | stop_lost | frameshift | essential_splice | ClinVar_pred_P_or_LP) & maf0_1
31383942	31383942_m3	31383942_m3	qualified for analyses	maf0_1	REVEL, Consequence	pLoFdamMis	rare	(stop_gained | stop_lost | frameshift | essential_splice | (missense & REVEL_score_0_5)) & maf0_1
31383942	31383942_m4	31383942_m4	qualified for analyses	maf0_1	REVEL, Consequence	pLoFdamMis	rare	(stop_gained | stop_lost | frameshift | essential_splice | (missense & REVEL_score_0_55)) & maf0_1
31383942	31383942_m5	31383942_m5	qualified for analyses	maf0_1	REVEL, Consequence	pLoFdamMis	rare	(stop_gained | stop_lost | frameshift | essential_splice | (missense & REVEL_score_0_6)) & maf0_1
31383942	31383942_m6	31383942_m6	qualified for analyses	maf0_1	REVEL, Consequence	pLoFdamMis	rare	(stop_gained | stop_lost | frameshift | essential_splice | (missense & REVEL_score_0_65)) & maf0_1
31383942	31383942_m7	31383942_m7	qualified for analyses	maf0_1	REVEL, Consequence	pLoFdamMis	rare	(stop_gained | stop_lost | frameshift | essential_splice | (missense & REVEL_score_0_7)) & maf0_1
31383942	31383942_m8	31383942_m8	qualified for analyses	maf0_1	REVEL, Consequence	pLoFdamMis	rare	(stop_gained | stop_lost | frameshift | essential_splice | (missense & REVEL_score_0_75)) & maf0_1
31383942	31383942_m9	31383942_m9	qualified for analyses	maf0_1	REVEL, Consequence	pLoFdamMis	rare	(stop_gained | stop_lost | frameshift | essential_splice | (missense & REVEL_score_0_8)) & maf0_1
31383942	31383942_m2	35939579_m1	qualified for analyses	maf0_1	MutationTaster, SIFT, Polyphen2, LRT, Consequence	pLoFdamMis	rare	(stop_gained | stop_lost | essential_splice | frameshift | (missense & Polyphen2_HDIV_pred_D & Polyphen2_HVAR_pred_D & LRT_pred_D & MutationTaster_pred_D_or_A & SIFT_pred_D)) & maf0_1
31562340	31562340_m1	31562340_m1	qualified for analyses	maf5	Consequence	pLoFmis	common	(missense | stop_gained | indels | frameshift) & maf5
31624253	31624253_m1	NA	unclear definition						Mask not clearly defined
31691645	31691645_m1	36848389_m1	qualified for analyses	maf1	LOFTEE	pLoF	low-frequency	LoF_HC & maf1
31700678	31700678_m1	31700678_m1	qualified for analyses	maf0_1	Consequence	misIndels	rare	missense & maf0_1
31771860	31771860_m1	31771860_m1	unqualified for analyses	maf1	Polyphen2	pLoFdamMis	low-frequency	(stop_gained | stop_lost | essential_splice | frameshift | missense & Polyphen2_HDIV) & denovo & maf1
31866045	31866045_m1	31866045_m1	qualified for analyses	maf1	Consequence	pLoFmis	low-frequency	(frameshift | indels | essential_splice | stop_gained | missense | stop_lost) & maf1
31890855	31890855_m1	31890855_m1	qualified for analyses	mac1	IMPACT, Consequence, Polyphen2	pLoFdamMis	ultra rare	(IMPACT_HIGH | (missense & (Polyphen2_HDIV_pred_D | Polyphen2_HVAR_pred_D))) & mac1
31970404	31970404_m1	31970404_m1	qualified for analyses	maf0_1	CADD, Consequence	pLoFdamMis	rare	(stop_gained | stop_lost | frameshift | CADD_phred_20) & maf0_1
31983221	31983221_m1	31983221_m1	qualified for analyses	maf0_01	Consequence	pLoF	ultra rare	(stop_gained | essential_splice | frameshift) & maf0_01
31983221	31983221_m2	31983221_m2	qualified for analyses	maf0_01	Consequence	misIndels	ultra rare	(missense | indels) & maf0_01
32042909	32042909_m4	27346685_m1	qualified for analyses	maf1	Consequence	pLoFmis	low-frequency	(missense | stop_gained | essential_splice) & maf1
32042909	32042909_m3	30377230_m2	qualified for analyses	maf0_1	Consequence	pLoFmis	rare	(stop_gained | essential_splice | missense) & maf0_1
32042909	32042909_m1	32042909_m1	qualified for analyses	maf0_1	CADD	pLoFdamMis	rare	CADD_phred_12_37 & maf0_1
32042909	32042909_m2	33397775_m1	qualified for analyses	maf1	CADD	pLoFdamMis	low-frequency	CADD_phred_12_37 & maf1
32128068	32128068_m1	32128068_m1	qualified for analyses	maf0_5	Polyphen2, Consequence, MutationTaster, SIFT	pLoFdamMis	low-frequency	(stop_gained | essential_splice | frameshift | (missense & (Polyphen2_HDIV_pred_D | Polyphen2_HVAR_pred_D | MutationTaster_pred_D_or_A | SIFT_pred_D))) & maf0_5
32141622	32141622_m2	32141622_m2	qualified for analyses	mac3	Polyphen2, Consequence, SIFT	damMis	ultra rare	(missense & Polyphen2_HDIV_pred_D & Polyphen2_HVAR_pred_D & SIFT_pred_D) & mac3
32141622	32141622_m3	32141622_m3	qualified for analyses	mac3	Polyphen2, Consequence, SIFT	damMis	ultra rare	(missense & Polyphen2_HDIV_pred_B & Polyphen2_HVAR_pred_B & SIFT_pred_B) & mac3
32141622	32141622_m4	32141622_m4	qualified for analyses	noMAF	Consequence	misIndels	common	indels
32141622	32141622_m5	32141622_m5	qualified for analyses	noMAF	Consequence	pLoF	common	stop_gained | frameshift
32141622	32141622_m6	32141622_m6	qualified for analyses	maf1	Consequence	pLoFmis	common	stop_gained | frameshift | (missense & maf1)
32141622	32141622_m7	32141622_m7	qualified for analyses	noMAF	Consequence	coding	common	stop_gained | essential_splice | frameshift | splice_region_variant
32141622	32141622_m8	32141622_m8	qualified for analyses	maf1	Consequence	coding	common	stop_gained | essential_splice | frameshift | splice_region_variant | (missense & maf1)
32141622	32141622_m1	35108381_m2	qualified for analyses	mac1	Consequence	misIndels	ultra rare	missense & mac1
32191290	32191290_m1	NA	unclear definition						Mask not clearly defined
32191290	32191290_m2	NA	unclear definition						Mask not clearly defined
32191290	32191290_m3	NA	unclear definition						Mask not clearly defined
32192357	32192357_m1	31983221_m1	qualified for analyses	maf0_01	Consequence	pLoF	ultra rare	(stop_gained | essential_splice | frameshift) & maf0_01
32192357	32192357_m2	32192357_m2	qualified for analyses	maf0_01	REVEL, Consequence	damMis	ultra rare	(missense & REVEL_score_0_5) & maf0_01
32192357	32192357_m3	34903660_m3	qualified for analyses	maf0_01	REVEL, Consequence	pLoFdamMis	ultra rare	(stop_gained | essential_splice | frameshift | (missense & REVEL_score_0_5)) & maf0_01
32246154	32246154_m1	37381728_m1	qualified for analyses	maf1	CADD	pLoFdamMis	low-frequency	CADD_phred_20 & maf1
32254024	32254024_m1	32254024_m1	qualified for analyses	maf0_01	Consequence	pLoF	ultra rare	(stop_gained | frameshift) & maf0_01
32330418	32330418_m5	32330418_m5	unqualified for analyses	mac3	CADD	other	ultra rare	CADD_phred_10 & mac3 for non-coding
32330418	32330418_m6	32330418_m6	unqualified for analyses	maf0_01	CADD	other	ultra rare	CADD_phred_10 & maf0_01_gnomAD for non-coding
32330418	32330418_m7	32330418_m7	unqualified for analyses	mac3	CADD	other	ultra rare	CADD_phred_15 & mac3 for non-coding
32330418	32330418_m8	32330418_m8	unqualified for analyses	maf0_01	CADD	other	ultra rare	CADD_phred_15 & maf0_01_gnomAD for non-coding
32330418	32330418_m1	NA	unclear definition						Mask not clearly defined
32330418	32330418_m2	NA	unclear definition						Mask not clearly defined
32330418	32330418_m3	NA	unclear definition						Mask not clearly defined
32330418	32330418_m4	NA	unclear definition						Mask not clearly defined
32330418	32330418_m9	NA	unclear definition						LoF not clearly defined
32492392	32492392_m1	32492392_m1	qualified for analyses	maf0_025	Consequence	pLoF	rare	(stop_gained | essential_splice | frameshift) & maf0_025
32492392	32492392_m2	32492392_m2	qualified for analyses	maf0_025	MutationTaster, SIFT, Polyphen2, LRT, Consequence	pLoFdamMis	rare	((stop_gained | essential_splice | frameshift | missense | stop_lost | start_lost | start_retained) & (Polyphen2_HDIV_pred_D_or_P & Polyphen2_HVAR_pred_D_or_P & LRT_pred_D & MutationTaster_pred_D_or_A & SIFT_pred_D)) & maf0_025
32492392	32492392_m3	32492392_m3	qualified for analyses	maf1	MutationTaster, SIFT, Polyphen2, LRT, Consequence	pLoFdamMis	low-frequency	((stop_gained | essential_splice | frameshift | missense | stop_lost | start_lost | start_retained) & (Polyphen2_HDIV_pred_D_or_P | Polyphen2_HVAR_pred_D_or_P | LRT_pred_D | MutationTaster_pred_D_or_A | SIFT_pred_D)) & maf1
32501810	32501810_m1	27120077_m2	qualified for analyses	maf1	MutationTaster, SIFT, Polyphen2, LRT, Consequence	pLoFdamMis	low-frequency	(stop_gained | essential_splice | frameshift | (missense & Polyphen2_HDIV_pred_D & Polyphen2_HVAR_pred_D & LRT_pred_D & MutationTaster_pred_D_or_A & SIFT_pred_D)) & maf1
32531060	32531060_m1	25487149_m3	qualified for analyses	maf1	Consequence	pLoF	low-frequency	(stop_gained | essential_splice | frameshift) & maf1
32640185	32640185_m1	32640185_m1	qualified for analyses	maf5	MutationTaster, SIFT, Polyphen2, LRT, Consequence	pLoFdamMis	common	(stop_gained | stop_lost | essential_splice | frameshift | start_lost | (missense & (Polyphen2_HDIV_pred_D | Polyphen2_HVAR_pred_D | LRT_pred_D | MutationTaster_pred_D_or_A | SIFT_pred_D))) & maf5
32640185	32640185_m2	32640185_m2	qualified for analyses	maf5	MutationTaster, SIFT, Polyphen2, LRT, Consequence	pLoFdamMis	common	(stop_gained | stop_lost | essential_splice | frameshift | start_lost | (missense & Polyphen2_HDIV_pred_D & Polyphen2_HVAR_pred_D & LRT_pred_D & MutationTaster_pred_D_or_A & SIFT_pred_D)) & maf5
32640185	32640185_m3	32640185_m3	qualified for analyses	maf5	Consequence	pLoF	common	(stop_gained | stop_lost | essential_splice | frameshift | start_lost) & maf5
32640185	32640185_m4	32640185_m4	qualified for analyses	maf5	Consequence	pLoFmis	common	(stop_gained | stop_lost | essential_splice | frameshift | start_lost | missense) & maf5
32640185	32640185_m5	32640185_m5	qualified for analyses	maf1	MutationTaster, SIFT, Polyphen2, LRT, Consequence	pLoFdamMis	low-frequency	(stop_gained | stop_lost | essential_splice | frameshift | start_lost | (missense & (Polyphen2_HDIV_pred_D | Polyphen2_HVAR_pred_D | LRT_pred_D | MutationTaster_pred_D_or_A | SIFT_pred_D))) & maf1
32640185	32640185_m6	32640185_m6	qualified for analyses	maf1	MutationTaster, SIFT, Polyphen2, LRT, Consequence	pLoFdamMis	low-frequency	(stop_gained | stop_lost | essential_splice | frameshift | start_lost | (missense & Polyphen2_HDIV_pred_D & Polyphen2_HVAR_pred_D & LRT_pred_D & MutationTaster_pred_D_or_A & SIFT_pred_D)) & maf1
32640185	32640185_m7	32640185_m7	qualified for analyses	maf1	Consequence	pLoF	low-frequency	(stop_gained | stop_lost | essential_splice | frameshift | start_lost) & maf1
32640185	32640185_m8	32640185_m8	qualified for analyses	maf1	Consequence	pLoFmis	low-frequency	(stop_gained | stop_lost | essential_splice | frameshift | start_lost | missense) & maf1
32651235	32651235_m1	32651235_m1	qualified for analyses	maf5	Consequence	pLoF	common	(stop_gained | essential_splice | frameshift) & maf5
32651235	32651235_m2	32651235_m2	unqualified for analyses	maf1	Other annotation	other	low-frequency	CNV & maf1
32746945	32746945_m2	22521419_m1	qualified for analyses	maf1	Consequence	misIndels	low-frequency	missense & maf1
32746945	32746945_m1	29140481_m1	qualified for analyses	maf1	Consequence	pLoF	low-frequency	(stop_gained | stop_lost | essential_splice | frameshift) & maf1
32746945	32746945_m6	29177435_m1	qualified for analyses	maf1	IMPACT, Consequence	coding	low-frequency	(incomplete_terminal_codon | start_retained | stop_retained | synonymous | IMPACT_MODERATE | IMPACT_HIGH) & maf1
32746945	32746945_m3	29955173_m5	qualified for analyses	maf1	Consequence	pLoFmis	low-frequency	(stop_gained | stop_lost | essential_splice | frameshift | missense) & maf1
32746945	32746945_m4	32746945_m4	unqualified for analyses	maf1	ReVe	pLoFdamMis	low-frequency	(ReVe_pred_D | disease_specific) & maf1
32746945	32746945_m7	32746945_m7	unqualified for analyses	maf1	Consequence	other	low-frequency	(UTR | intron) & maf1
32746945	32746945_m8	32746945_m8	unqualified for analyses	maf1	Consequence	other	low-frequency	(promoter | enhancer) & maf1
32746945	32746945_m9	32746945_m9	unqualified for analyses	maf1	Other annotation	other	low-frequency	eQTL & maf1
32746945	32746945_m5	34216101_m10	unqualified for analyses	maf1	Consequence	syn	low-frequency	synonymous & maf1
32853339	32853339_m1	32853339_m1	qualified for analyses	maf1	IMPACT, ClinVar	pLoFdamMis	low-frequency	(IMPACT_HIGH | ClinVar_pred_P_or_LP) & maf1
32866655	32866655_m1	30425093_m1	qualified for analyses	maf1	ClinVar	pLoFdamMis	low-frequency	ClinVar_pred_P_or_LP & maf1
32866655	32866655_m2	30425093_m2	qualified for analyses	maf1	Consequence	pLoF	low-frequency	(stop_gained | frameshift) & maf1
32970752	32970752_m1	32970752_m1	qualified for analyses	maf1	CADD, Consequence	pLoFdamMis	low-frequency	(stop_gained | stop_lost | essential_splice | CADD_phred_20) & maf1
33087929	33087929_m1	33087929_m1	qualified for analyses	maf1	Consequence	pLoF	low-frequency	(stop_gained | essential_splice | frameshift | start_lost) & maf1
33110418	33110418_m1	33110418_m1	qualified for analyses	mac1, mac0_gnomAD	Consequence	pLoF	ultra rare	(stop_gained | essential_splice | frameshift) & mac1 & mac0_gnomAD
33110418	33110418_m2	33110418_m2	qualified for analyses	mac1, mac0_gnomAD	Consequence	misIndels	ultra rare	missense & mac1 & mac0_gnomAD
33157009	33157009_m1	NA	unclear definition						LGD not clearly defined, de novo variants included
33208543	33208543_m4	23408866_m7	unqualified for analyses	maf5	Consequence	syn	common	synonymous & maf5
33208543	33208543_m3	34216101_m10	unqualified for analyses	maf1	Consequence	syn	low-frequency	synonymous & maf1
33208543	33208543_m1	NA	unclear definition						LoF not clearly defined
33208543	33208543_m2	NA	unclear definition						LoF not clearly defined
33239198	33239198_m3	22521419_m1	qualified for analyses	maf1	Consequence	misIndels	low-frequency	missense & maf1
33239198	33239198_m4	25487149_m3	qualified for analyses	maf1	Consequence	pLoF	low-frequency	(stop_gained | essential_splice | frameshift) & maf1
33239198	33239198_m5	29177435_m1	qualified for analyses	maf1	IMPACT, Consequence	coding	low-frequency	(incomplete_terminal_codon | start_retained | stop_retained | synonymous | IMPACT_MODERATE | IMPACT_HIGH) & maf1
33239198	33239198_m1	33239198_m1	qualified for analyses	maf1	Consequence	pLoFmis	low-frequency	(stop_gained | essential_splice | frameshift | missense) & maf1
33239198	33239198_m2	33397775_m1	qualified for analyses	maf1	CADD	pLoFdamMis	low-frequency	CADD_phred_12_37 & maf1
33326012	33326012_m6	33326012_m6	unqualified for analyses	maf0_05, mac0_gnomAD	Consequence	syn	ultra rare	synonymous & maf0_05 & mac0_gnomAD
33326012	33326012_m1	NA	unclear definition						PTV not clearly defined
33326012	33326012_m2	NA	unclear definition						PTV not clearly defined
33326012	33326012_m3	NA	unclear definition						PTV not clearly defined
33326012	33326012_m4	NA	unclear definition						PTV not clearly defined
33326012	33326012_m5	NA	unclear definition						PTV not clearly defined
33349842	33349842_m2	22521419_m1	qualified for analyses	maf1	Consequence	misIndels	low-frequency	missense & maf1
33349842	33349842_m3	29140481_m1	qualified for analyses	maf1	Consequence	pLoF	low-frequency	(stop_gained | stop_lost | essential_splice | frameshift) & maf1
33349842	33349842_m4	33349842_m4	unqualified for analyses	maf1	Consequence	other	low-frequency	(stop_gained | stop_lost | essential_splice | frameshift | missense | regulatory) & maf1
33349842	33349842_m5	33349842_m5	unqualified for analyses	maf1	Consequence	other	low-frequency	regulatory & maf1
33349842	33349842_m6	33349842_m6	unqualified for analyses	maf1	Consequence	other	low-frequency	(coding | non_coding) & maf1
33349842	33349842_m1	33397775_m1	qualified for analyses	maf1	CADD	pLoFdamMis	low-frequency	CADD_phred_12_37 & maf1
33397775	33397775_m2	22521419_m1	qualified for analyses	maf1	Consequence	misIndels	low-frequency	missense & maf1
33397775	33397775_m3	25487149_m3	qualified for analyses	maf1	Consequence	pLoF	low-frequency	(stop_gained | essential_splice | frameshift) & maf1
33397775	33397775_m5	29177435_m1	qualified for analyses	maf1	IMPACT, Consequence	coding	low-frequency	(incomplete_terminal_codon | start_retained | stop_retained | synonymous | IMPACT_MODERATE | IMPACT_HIGH) & maf1
33397775	33397775_m4	33239198_m1	qualified for analyses	maf1	Consequence	pLoFmis	low-frequency	(stop_gained | essential_splice | frameshift | missense) & maf1
33397775	33397775_m1	33397775_m1	qualified for analyses	maf1	CADD	pLoFdamMis	low-frequency	CADD_phred_12_37 & maf1
33432171	33432171_m1	31383942_m1	qualified for analyses	maf0_1	Consequence	pLoF	rare	(stop_gained | stop_lost | frameshift | essential_splice) & maf0_1
33432171	33432171_m2	33432171_m2	qualified for analyses	maf0_1	REVEL, Consequence	damMis	rare	(missense & REVEL_score_0_5) & maf0_1
33483695	33483695_m1	33483695_m1	unqualified for analyses	maf1	InterVar	pLoF	low-frequency	((missense | essential_splice | stop_gained | start_lost | stop_lost) & InterVar) & maf1
33504798	33504798_m2	33504798_m2	qualified for analyses	maf0_1	CADD, Consequence, LOFTEE, MPC	pLoFdamMis	rare	(LoF_HC | indels | (missense & CADD_phred_25 & MPC_gt2)) & maf0_1
33504798	33504798_m1	35568032_m1	qualified for analyses	maf0_1	LOFTEE	pLoF	rare	LoF_HC & maf0_1
33548076	33548076_m1	33548076_m1	qualified for analyses	noMAF	Polyphen2, Consequence, SIFT	pLoFdamMis	common	(missense | stop_gained | stop_lost) & (SIFT_pred_D & Polyphen2_HDIV_pred_D)
33548076	33548076_m2	33548076_m2	qualified for analyses	maf5, mac0_gnomAD	Polyphen2, Consequence, SIFT	pLoFdamMis	common	((missense | stop_gained | stop_lost) & (SIFT_pred_D & Polyphen2_HDIV_pred_D)) & (maf5 | mac0_gnomAD)
33602785	33602785_m1	33602785_m1	qualified for analyses	maf2	Consequence	pLoF	common	(stop_gained | stop_lost | essential_splice | frameshift | start_lost) & maf2
33651715	33651715_m1	33239198_m1	qualified for analyses	maf1	Consequence	pLoFmis	low-frequency	(stop_gained | essential_splice | frameshift | missense) & maf1
33813136	33813136_m2	32651235_m1	qualified for analyses	maf5	Consequence	pLoF	common	(stop_gained | essential_splice | frameshift) & maf5
33813136	33813136_m1	33813136_m1	qualified for analyses	maf5	CADD	pLoFdamMis	common	CADD_phred_20 & maf5
33813136	33813136_m3	33813136_m3	qualified for analyses	maf10	Consequence	misIndels	common	missense & maf10
33813136	33813136_m4	33813136_m4	qualified for analyses	maf10	Consequence	misIndels	common	indels & maf10
33932343	33932343_m5	33326012_m6	unqualified for analyses	maf0_05, mac0_gnomAD	Consequence	syn	ultra rare	synonymous & maf0_05 & mac0_gnomAD
33932343	33932343_m1	33932343_m1	qualified for analyses	maf0_05, mac0_gnomAD	LOFTEE	pLoF	ultra rare	LoF_HC & maf0_05 & mac0_gnomAD
33932343	33932343_m2	33932343_m2	qualified for analyses	maf0_05, mac0_gnomAD	REVEL, Consequence	damMis	ultra rare	(missense & REVEL_score_0_5) & maf0_05 & mac0_gnomAD
33932343	33932343_m3	33932343_m3	qualified for analyses	maf0_05, mac0_gnomAD	REVEL, Consequence, LOFTEE	pLoFdamMis	ultra rare	(LoF_HC | (missense & REVEL_score_0_5)) & maf0_05 & mac0_gnomAD
33932343	33932343_m4	33932343_m4	unqualified for analyses	maf0_05, mac0_gnomAD	REVEL, MTR	pLoFdamMis	ultra rare	(LoF_HC | (missense & REVEL_score_0_5 & MTR_score_0_78)) & maf0_05 & mac0_gnomAD
33971972	33971972_m1	33971972_m1	unqualified for analyses	maf0_01	REVEL	pLoFdamMis	ultra rare	(LGD | missense & optREVEL) & maf0_01
33974636	33974636_m1	33974636_m1	qualified for analyses	maf5	Consequence	misIndels	common	missense & maf5
34113005	34113005_m2	24463508_m4	qualified for analyses	maf0_1	Consequence	pLoF	rare	(stop_gained | essential_splice | frameshift) & maf0_1
34113005	34113005_m1	31700678_m1	qualified for analyses	maf0_1	Consequence	misIndels	rare	missense & maf0_1
34115965	34115965_m2	32640185_m5	qualified for analyses	maf1	MutationTaster, SIFT, Polyphen2, LRT, Consequence	pLoFdamMis	low-frequency	(stop_gained | stop_lost | essential_splice | frameshift | start_lost | (missense & (Polyphen2_HDIV_pred_D | Polyphen2_HVAR_pred_D | LRT_pred_D | MutationTaster_pred_D_or_A | SIFT_pred_D))) & maf1
34115965	34115965_m17	32640185_m6	qualified for analyses	maf1	MutationTaster, SIFT, Polyphen2, LRT, Consequence	pLoFdamMis	low-frequency	(stop_gained | stop_lost | essential_splice | frameshift | start_lost | (missense & Polyphen2_HDIV_pred_D & Polyphen2_HVAR_pred_D & LRT_pred_D & MutationTaster_pred_D_or_A & SIFT_pred_D)) & maf1
34115965	34115965_m12	32640185_m7	qualified for analyses	maf1	Consequence	pLoF	low-frequency	(stop_gained | stop_lost | essential_splice | frameshift | start_lost) & maf1
34115965	34115965_m7	32640185_m8	qualified for analyses	maf1	Consequence	pLoFmis	low-frequency	(stop_gained | stop_lost | essential_splice | frameshift | start_lost | missense) & maf1
34115965	34115965_m1	34115965_m1	qualified for analyses	maf0_1	MutationTaster, SIFT, Polyphen2, LRT, Consequence	pLoFdamMis	rare	(stop_gained | stop_lost | essential_splice | frameshift | start_lost | (missense & (Polyphen2_HDIV_pred_D | Polyphen2_HVAR_pred_D | LRT_pred_D | MutationTaster_pred_D_or_A | SIFT_pred_D))) & maf0_1
34115965	34115965_m10	34115965_m10	qualified for analyses	mac1	Consequence	pLoFmis	ultra rare	(stop_gained | stop_lost | essential_splice | frameshift | start_lost | missense) & mac1
34115965	34115965_m11	34115965_m11	qualified for analyses	maf0_1	Consequence	pLoF	rare	(stop_gained | stop_lost | essential_splice | frameshift | start_lost) & maf0_1
34115965	34115965_m13	34115965_m13	qualified for analyses	maf0_01	Consequence	pLoF	ultra rare	(stop_gained | stop_lost | essential_splice | frameshift | start_lost) & maf0_01
34115965	34115965_m14	34115965_m14	qualified for analyses	maf0_001	Consequence	pLoF	ultra rare	(stop_gained | stop_lost | essential_splice | frameshift | start_lost) & maf0_001
34115965	34115965_m15	34115965_m15	qualified for analyses	mac1	Consequence	pLoF	ultra rare	(stop_gained | stop_lost | essential_splice | frameshift | start_lost) & mac1
34115965	34115965_m16	34115965_m16	qualified for analyses	maf0_1	MutationTaster, SIFT, Polyphen2, LRT, Consequence	pLoFdamMis	rare	(stop_gained | stop_lost | essential_splice | frameshift | start_lost | (missense & Polyphen2_HDIV_pred_D & Polyphen2_HVAR_pred_D & LRT_pred_D & MutationTaster_pred_D_or_A & SIFT_pred_D)) & maf0_1
34115965	34115965_m18	34115965_m18	qualified for analyses	maf0_01	MutationTaster, SIFT, Polyphen2, LRT, Consequence	pLoFdamMis	ultra rare	(stop_gained | stop_lost | essential_splice | frameshift | start_lost | (missense & Polyphen2_HDIV_pred_D & Polyphen2_HVAR_pred_D & LRT_pred_D & MutationTaster_pred_D_or_A & SIFT_pred_D)) & maf0_01
34115965	34115965_m19	34115965_m19	qualified for analyses	maf0_001	MutationTaster, SIFT, Polyphen2, LRT, Consequence	pLoFdamMis	ultra rare	(stop_gained | stop_lost | essential_splice | frameshift | start_lost | (missense & Polyphen2_HDIV_pred_D & Polyphen2_HVAR_pred_D & LRT_pred_D & MutationTaster_pred_D_or_A & SIFT_pred_D)) & maf0_001
34115965	34115965_m20	34115965_m20	qualified for analyses	mac1	MutationTaster, SIFT, Polyphen2, LRT, Consequence	pLoFdamMis	ultra rare	(stop_gained | stop_lost | essential_splice | frameshift | start_lost | (missense & Polyphen2_HDIV_pred_D & Polyphen2_HVAR_pred_D & LRT_pred_D & MutationTaster_pred_D_or_A & SIFT_pred_D)) & mac1
34115965	34115965_m3	34115965_m3	qualified for analyses	maf0_01	MutationTaster, SIFT, Polyphen2, LRT, Consequence	pLoFdamMis	ultra rare	(stop_gained | stop_lost | essential_splice | frameshift | start_lost | (missense & (Polyphen2_HDIV_pred_D | Polyphen2_HVAR_pred_D | LRT_pred_D | MutationTaster_pred_D_or_A | SIFT_pred_D))) & maf0_01
34115965	34115965_m4	34115965_m4	qualified for analyses	maf0_001	MutationTaster, SIFT, Polyphen2, LRT, Consequence	pLoFdamMis	ultra rare	(stop_gained | stop_lost | essential_splice | frameshift | start_lost | (missense & (Polyphen2_HDIV_pred_D | Polyphen2_HVAR_pred_D | LRT_pred_D | MutationTaster_pred_D_or_A | SIFT_pred_D))) & maf0_001
34115965	34115965_m5	34115965_m5	qualified for analyses	mac1	MutationTaster, SIFT, Polyphen2, LRT, Consequence	pLoFdamMis	ultra rare	(stop_gained | stop_lost | essential_splice | frameshift | start_lost | (missense & (Polyphen2_HDIV_pred_D | Polyphen2_HVAR_pred_D | LRT_pred_D | MutationTaster_pred_D_or_A | SIFT_pred_D))) & mac1
34115965	34115965_m6	34115965_m6	qualified for analyses	maf0_1	Consequence	pLoFmis	rare	(stop_gained | stop_lost | essential_splice | frameshift | start_lost | missense) & maf0_1
34115965	34115965_m8	34115965_m8	qualified for analyses	maf0_01	Consequence	pLoFmis	ultra rare	(stop_gained | stop_lost | essential_splice | frameshift | start_lost | missense) & maf0_01
34115965	34115965_m9	34115965_m9	qualified for analyses	maf0_001	Consequence	pLoFmis	ultra rare	(stop_gained | stop_lost | essential_splice | frameshift | start_lost | missense) & maf0_001
34125151	34125151_m1	34125151_m1	qualified for analyses	maf0_04	Consequence	pLoF	rare	(stop_gained | essential_splice | frameshift | stop_lost | start_lost) & maf0_04
34125151	34125151_m2	34125151_m2	qualified for analyses	maf0_04	CADD, Consequence, MetaSVM	pLoFdamMis	rare	(stop_gained | essential_splice | frameshift | stop_lost | start_lost | (missense & (CADD_phred_20 | MetaSVM_pred_D))) & maf0_04
34152079	34152079_m1	34152079_m1	qualified for analyses	maf5	Consequence	pLoF	common	(stop_gained | stop_lost | essential_splice | frameshift | start_lost | transcript_amplification) & maf5
34152079	34152079_m2	34152079_m2	qualified for analyses	maf5	Consequence	pLoFmis	common	(stop_gained | stop_lost | essential_splice | frameshift | start_lost | transcript_amplification | indels | missense | protein_altering_variant) & maf5
34183866	34183866_m2	31983221_m1	qualified for analyses	maf0_01	Consequence	pLoF	ultra rare	(stop_gained | essential_splice | frameshift) & maf0_01
34183866	34183866_m1	34183866_m1	qualified for analyses	maf0_01	Polyphen2, Consequence	pLoFdamMis	ultra rare	(stop_gained | essential_splice | frameshift | indels | (missense & Polyphen2_HDIV_pred_D)) & maf0_01
34216101	34216101_m1	34216101_m1	qualified for analyses	maf1	Consequence	pLoF	low-frequency	(frameshift | stop_gained | transcript_ablation) & maf1
34216101	34216101_m10	34216101_m10	unqualified for analyses	maf1	Consequence	syn	low-frequency	synonymous & maf1
34216101	34216101_m11	34216101_m11	unqualified for analyses	maf1	Consequence	other	low-frequency	5 prime UTR
34216101	34216101_m12	34216101_m12	unqualified for analyses	maf1	Consequence	other	low-frequency	Intronic
34216101	34216101_m2	34216101_m2	qualified for analyses	maf1	Polyphen2	damMis	low-frequency	(Polyphen2_HDIV_pred_D | Polyphen2_HVAR_pred_D) & maf1
34216101	34216101_m3	34216101_m3	qualified for analyses	maf1	Polyphen2	damMis	low-frequency	(Polyphen2_HDIV_pred_P | Polyphen2_HVAR_pred_P) & maf1
34216101	34216101_m4	34216101_m4	qualified for analyses	maf1	SIFT	damMis	low-frequency	SIFT_pred_D & maf1
34216101	34216101_m5	34216101_m5	qualified for analyses	maf1	Consequence	pLoF	low-frequency	essential_splice & maf1
34216101	34216101_m6	34216101_m6	qualified for analyses	maf1	Consequence	pLoFmis	low-frequency	(indels | transcript_amplification) & maf1
34216101	34216101_m7	34216101_m7	qualified for analyses	maf1	Consequence	misIndels	low-frequency	(missense | protein_altering_variant) & maf1
34216101	34216101_m8	34216101_m8	unqualified for analyses	maf1	Consequence	other	low-frequency	3 prime UTR
34216101	34216101_m9	34216101_m9	unqualified for analyses	maf1	Consequence	other	low-frequency	splice region
34263907	34263907_m1	31983221_m1	qualified for analyses	maf0_01	Consequence	pLoF	ultra rare	(stop_gained | essential_splice | frameshift) & maf0_01
34273592	34273592_m1	NA	unclear definition						LoF not clearly defined
34273592	34273592_m2	NA	unclear definition						LoF not clearly defined
34279065	34279065_m1	34279065_m1	unqualified for analyses	maf1	GenePy	pLoFdamMis	low-frequency	0.01
34324492	34324492_m1	34324492_m1	unqualified for analyses	maf1	Consequence	pLoF	low-frequency	0.01
34324492	34324492_m2	34324492_m2	unqualified for analyses	maf1	Consequence	damMis	low-frequency	0.01
34375979	34375979_m1	34375979_m1	qualified for analyses	maf0_1	Consequence	pLoF	rare	(frameshift | start_lost | stop_gained | stop_lost | essential_splice | transcript_ablation) & maf0_1
34375979	34375979_m10	34375979_m10	unqualified for analyses	maf0_025, mac0_gnomAD	REVEL, MTR	pLoFdamMis	ultra rare	Non-synonymous. Predicted to be damaging (REVEL score ≥ 0.25). Ultra-rare (minor allele frequency ≤ 0.00025 within the cohort and absent from gnomAD). Missense variants must fall within a constrained region (MTR < 0.78 or MTR_centile < 0.5)
34375979	34375979_m11	34375979_m11	unqualified for analyses	maf0_05	REVEL, MTR	damMis	ultra rare	Missense variants. Predicted to be damaging (REVEL score ≥ 0.25). Rare (minor allele frequency ≤ 0.0005 within the cohort and within gnomAD). Missense variants must fall within a constrained region (MTR < 0.78 or MTR_centile < 0.5)
34375979	34375979_m12	34375979_m12	unqualified for analyses	maf0_1	MTR	pLoFmis	rare	Non-synonymous. Moderately rare (minor allele frequency ≤ 0.001 within the cohort and within gnomAD). Missense variants must fall within a constrained region (MTR < 0.78 or MTR_centile < 0.5)
34375979	34375979_m2	34375979_m2	qualified for analyses	maf5	Consequence	pLoF	common	(frameshift | start_lost | stop_gained | stop_lost | essential_splice | transcript_ablation) & maf5
34375979	34375979_m3	34375979_m3	qualified for analyses	maf0_1	Consequence	pLoFmis	rare	(frameshift | start_lost | stop_gained | stop_lost | essential_splice | transcript_ablation | indels | missense | protein_altering_variant) & maf0_1
34375979	34375979_m4	34375979_m4	qualified for analyses	maf0_1	REVEL, Consequence	pLoFdamMis	rare	((frameshift | start_lost | stop_gained | stop_lost | essential_splice | transcript_ablation | indels | missense | protein_altering_variant) & REVEL_score_0_25) & maf0_1
34375979	34375979_m5	34375979_m5	qualified for analyses	maf0_1, maf0_05	REVEL, Consequence	pLoFdamMis	rare	(((frameshift | start_lost | stop_gained | stop_lost | essential_splice | transcript_ablation) & maf0_1) | ((indels | missense | protein_altering_variant) & maf0_05)) & REVEL_score_0_25
34375979	34375979_m6	34375979_m6	qualified for analyses	maf0_05	REVEL, Consequence	pLoFdamMis	rare	((indels | missense | protein_altering_variant) & REVEL_score_0_25) & maf0_05
34375979	34375979_m7	34375979_m7	qualified for analyses	maf0_025, mac0_gnomAD	REVEL, Consequence	pLoFdamMis	ultra rare	((frameshift | start_lost | stop_gained | stop_lost | essential_splice | transcript_ablation | indels | missense | protein_altering_variant) & REVEL_score_0_25) & maf0_025 & mac0_gnomAD
34375979	34375979_m8	34375979_m8	unqualified for analyses	maf0_05	Consequence	syn	ultra rare	synonymous & maf0_05
34375979	34375979_m9	34375979_m9	unqualified for analyses	maf0_5	Consequence	pLoFmis	low-frequency	Non-synonymous. Slightly rare (minor allele frequency ≤ 0.005 within the cohort and within gnomAD). Variant must either be homozygous, or there must be two or more such qualifying variants in the gene in the individual
34544842	34544842_m1	34544842_m1	unqualified for analyses	maf0_01	Human Splicing Finder, NetGene, MutationAssessor, FATHMM, CADD, SIFT, Polyphen2	pLoFdamMis	ultra rare	MAF <0.0001
34582791	34582791_m1	34582791_m1	qualified for analyses	maf1	Consequence, MetaSVM, LOFTEE, FATHMM	pLoFdamMis	low-frequency	(LoF_HC | fathmmXF_coding_score_0_5 | (missense & MetaSVM_pred_D)) & maf1
[truncated: 228 more rows]

## Sheet: Table S2b
Filter	Item	Number of publications	Percentage	Description
Annotation	Consequence	173	0.827751
[truncated: 69 more rows]

## Sheet: Table S2c
Decision	Harmonized mask	Annotation type	maxMAF threshold	Mask definition
[truncated: 298 more rows]

[truncated: 32 more sheets: Table S2d, Table S3, Table S4, Table S5a, Table S5b, Table S6, Table S7a, Table S7b, Table S8, Table S9a, Table S9b, Table S9c, Table S9d, Table S10, Table S11, Table S12a, Table S12b, Table S13a, Table S13b, Table S14a …]
